# Supplementary material for: Five new sesquiterpenoids from agarwood of Aquilaria sinensis
Source: publisher site journal article supplement (doi:10.3762/bjoc.19.75), 2023-06-30
Supplement: Additional file 1 [file 1860-5397-19-75-S1.pdf]

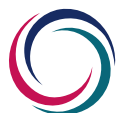

## Supporting Information

for

### **Five new sesquiterpenoids from agarwood of *Aquilaria sinensis***

Hong Zhou, Xu-Yang Li, Hong-Bin Fang, He-Zhong Jiang and Yong-Xian Cheng

*Beilstein J. Org. Chem.* **2023**, *19*, 998–1007. [doi:10.3762/bjoc.19.75](https://doi.org/10.3762/bjoc.19.75)

### **MS, UV, and NMR spectra of compounds 1–5, NMR and ECD calculations, and bioactivity assay data**

## Contents

**Figure S1:** The lowest energy conformers of **1** (the relative populations are in parentheses).

**Figure S2:** The lowest energy conformers of **2** (the relative populations are in parentheses).

**Figure S3:** The lowest energy conformers of **3** (the relative populations are in parentheses).

**Figure S4:** The lowest energy conformers of **4** (the relative populations are in parentheses).

**Figure S5:** The lowest energy conformers of **5** (the relative populations are in parentheses).

**Table 1:** Extracted heats and weighting factors of the optimized conformers of **1–5** at B3LYP/6-31G(d,p) level.

**Table 2:** The Cartesian coordinates of the lowest energy conformers for **1–5**.

**Figure S6:** DP4<sup>+</sup> results of candidate(7*R*,10*R*)-**1** (Isomer 1) and (7*R*,11*S*)-**1** (Isomer 2).

**Figure S7:** DP4<sup>+</sup> results of candidate (7*R*,10*R*, 11*R*)-**3** (Isomer 1) and (7*R*,10*R*,11*S*)-**3** (Isomer 2).

**Figure S8:** DP4<sup>+</sup> results of candidate(7*S*,10*S*,11*S*)-**5** (Isomer 1) and (7*R*,10*R*,11*S*)-**5** (Isomer 2).

**Figure S9:** <sup>1</sup>H NMR (500 MHz) spectrum of **1** in CD<sub>3</sub>OD.

**Figure S10:**  $^{13}\text{C}$  NMR and DEPT (125 MHz) spectra of **1** in  $\text{CD}_3\text{OD}$ .

**Figure S11:**  $^1\text{H}$ - $^1\text{H}$  COSY (500 MHz) spectrum of **1** in  $\text{CD}_3\text{OD}$ .

**Figure S12:** HSQC (500 MHz) spectrum of **1** in  $\text{CD}_3\text{OD}$ .

**Figure S13:** HSBC (500 MHz) spectrum of **1** in  $\text{CD}_3\text{OD}$ .

**Figure S14:** ROSEY (500 MHz) spectrum of **1** in  $\text{CD}_3\text{OD}$ .

**Figure S15:** HRESIMS of **1**.

**Figure S16:**  $^1\text{H}$  NMR (500 MHz) spectrum of **2** in  $\text{CD}_3\text{OD}$ .

**Figure S17:**  $^{13}\text{C}$  NMR (125MHz) spectrum of **2** in  $\text{CD}_3\text{OD}$ .

**Figure S18:**  $^1\text{H}$ - $^1\text{H}$  COSY (500 MHz) spectrum of **2** in  $\text{CD}_3\text{OD}$

**Figure S19:** HSQC (500 MHz) spectrum of **2** in  $\text{CD}_3\text{OD}$ .

**Figure S20:** HSBC (500 MHz) spectrum of **2** in  $\text{CD}_3\text{OD}$ .

**Figure S21:** ROSEY (500 MHz) spectrum of **2** in  $\text{CD}_3\text{OD}$ .

**Figure S22:** HRESIMS of **2**.

**Figure S23:**  $^1\text{H}$  NMR (500 MHz) spectrum of **3** in  $\text{CD}_3\text{OD}$ .

**Figure S24:**  $^{13}\text{C}$  NMR and DEPT (150 MHz) spectra of **3** in  $\text{CD}_3\text{OD}$ .

**Figure S25:**  $^1\text{H}$ - $^1\text{H}$  COSY (600 MHz) spectrum of **3** in  $\text{CD}_3\text{OD}$ .

**Figure S26:** HSQC (600 MHz) spectrum of **3** in  $\text{CD}_3\text{OD}$ .

**Figure S27:** HSBC (600 MHz) spectrum of **3** in  $\text{CD}_3\text{OD}$ .

**Figure S28:** ROSEY (600 MHz) spectrum of **3** in  $\text{CD}_3\text{OD}$ .

**Figure S29:** HRESIMS of **3**.

**Figure S30:**  $^1\text{H}$  NMR (500 MHz) spectrum of **4** in  $\text{CD}_3\text{OD}$ .

**Figure S31:**  $^{13}\text{C}$  NMR and DEPT (150 MHz) spectra of **4** in  $\text{CD}_3\text{OD}$ .

**Figure S32:**  $^1\text{H}$ - $^1\text{H}$  COSY (600 MHz) spectrum of **4** in  $\text{CD}_3\text{OD}$ .

**Figure S33:** HSQC (600 MHz) spectrum of **4** in  $\text{CD}_3\text{OD}$ .

**Figure S34:** HSBC (600 MHz) spectrum of **4** in  $\text{CD}_3\text{OD}$ .

**Figure S35:** ROSEY (600 MHz) spectrum of **4** in  $\text{CD}_3\text{OD}$ .

**Figure S36:** HRESIMS of **4**

**Figure S37:**  $^1\text{H}$  NMR (500 MHz) spectrum of **5** in  $\text{CDCl}_3$ .

**Figure S38:**  $^{13}\text{C}$  NMR and DEPT (150 MHz) spectra of **5** in  $\text{CDCl}_3$ .

**Figure S39:**  $^1\text{H}$ - $^1\text{H}$  COSY (600 MHz) spectrum of **5** in  $\text{CDCl}_3$ .

**Figure S40:** HSQC (600 MHz) spectrum of **5** in  $\text{CDCl}_3$ .

**Figure S41:** HSBC (600 MHz) spectrum of **5** in  $\text{CDCl}_3$

**Figure S42:** ROSEY (600 MHz) spectrum of **5** in  $\text{CDCl}_3$ .

**Figure S43:** HRESIMS of **5**.

**Figure S44:** UV-vis spectra of **1–5**

**Fig A:** human breast cancer cell line (MCF-7) were treated with 40  $\mu\text{M}$  with compounds **1–5** for 24 h, and cell viability was determined by CCK-8 assay.

**Fig B:** RAW 264.7 were treated with 20  $\mu\text{M}$  with compounds **1–5** for 24 h, and cell viability was determined by CCK-8 assay.

**Fig C:** Compounds suppress LPS-induced INOS and COX-2 expression in RAW 264.7 cells.

Selected conformation of **1** and their percentage

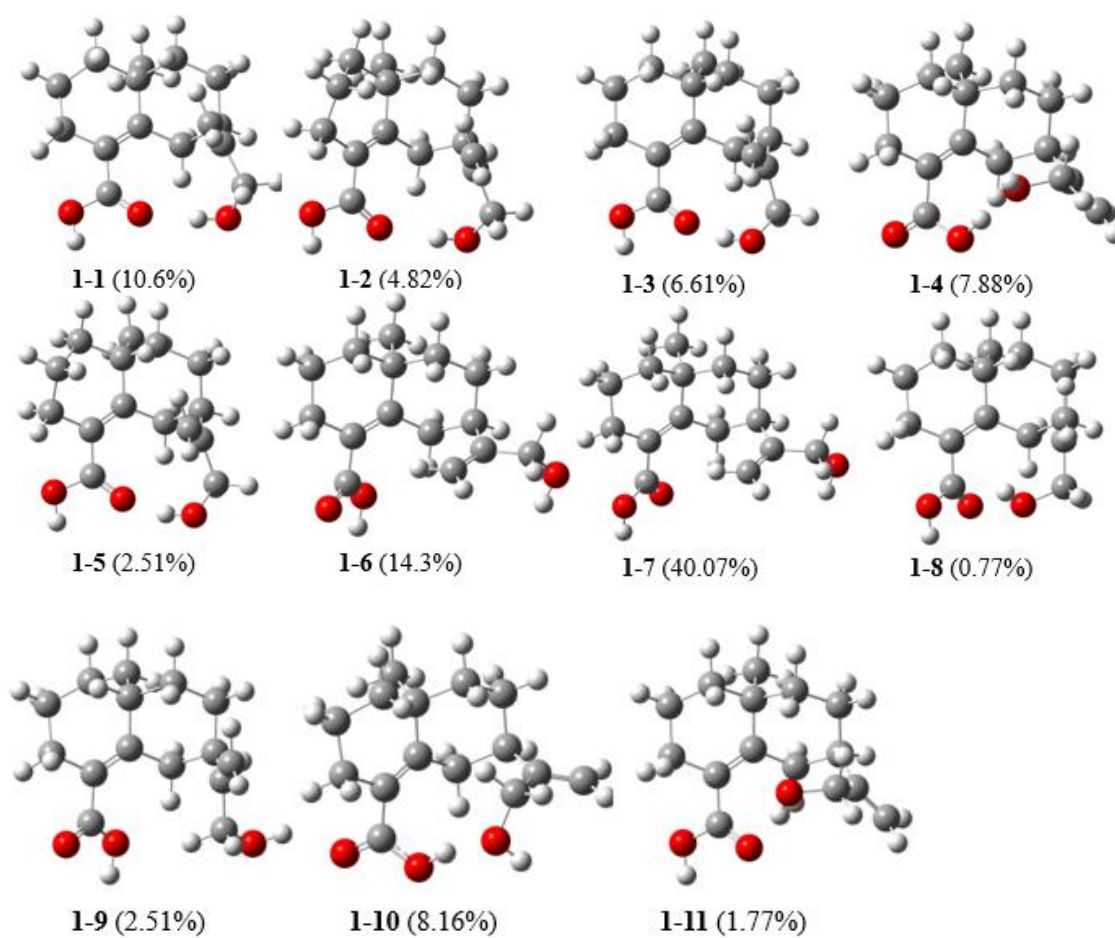

**Figure S1:** The lowest energy conformers of **1** (the relative populations are in parentheses).

Selected conformation of **2** and their percentage

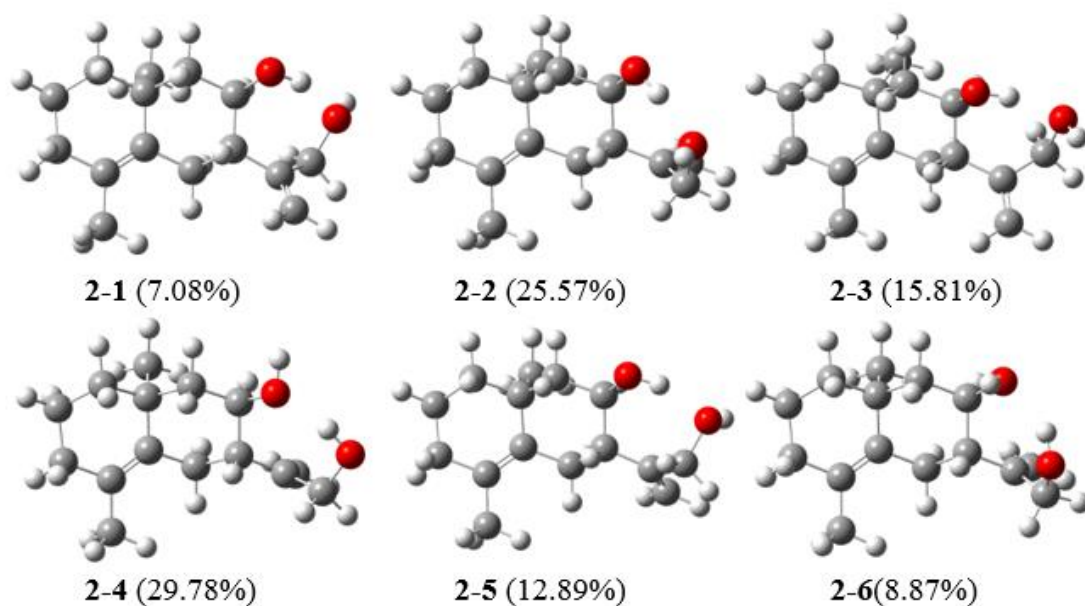

**Figure S2:** The lowest energy conformers of **2** (the relative populations are in parentheses).

Selected conformation of **3** and their percentage

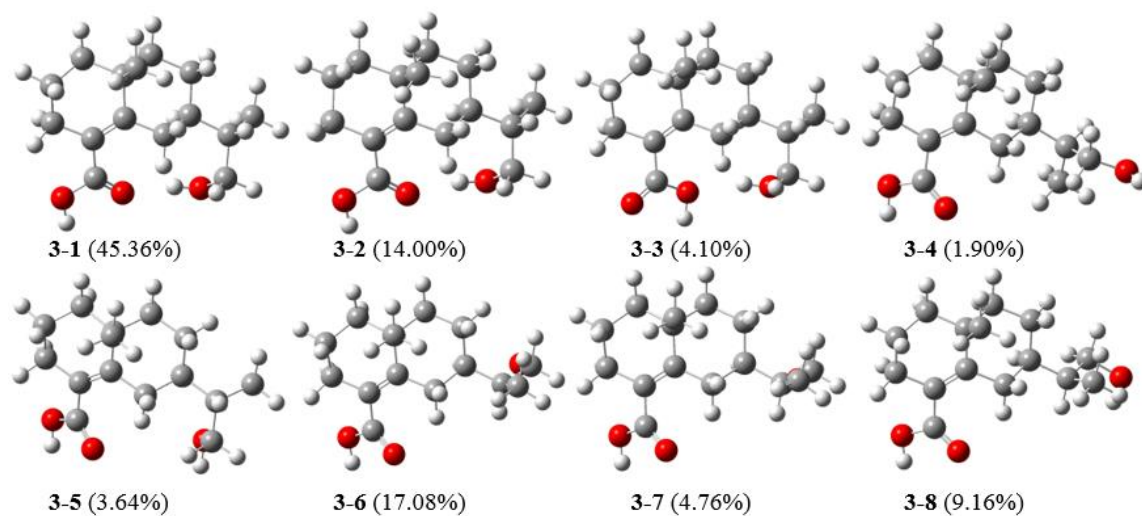

**Figure S3:** The lowest energy conformers of **3** (the relative populations are in parentheses).

Selected conformation of **4** and their percentage

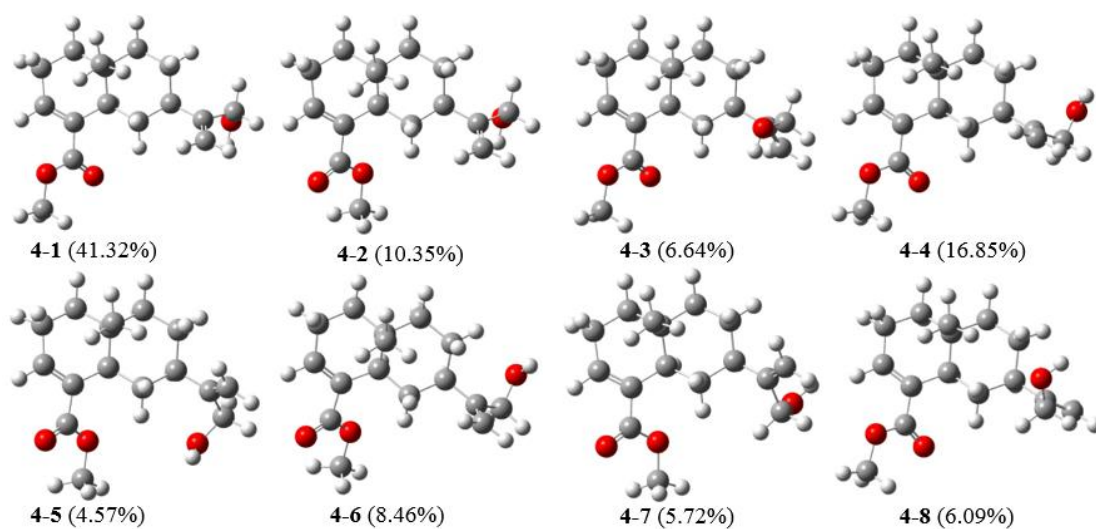

**Figure S4:** The lowest energy conformers of **4** (the relative populations are in parentheses).

Selected conformation of **5** and their percentage

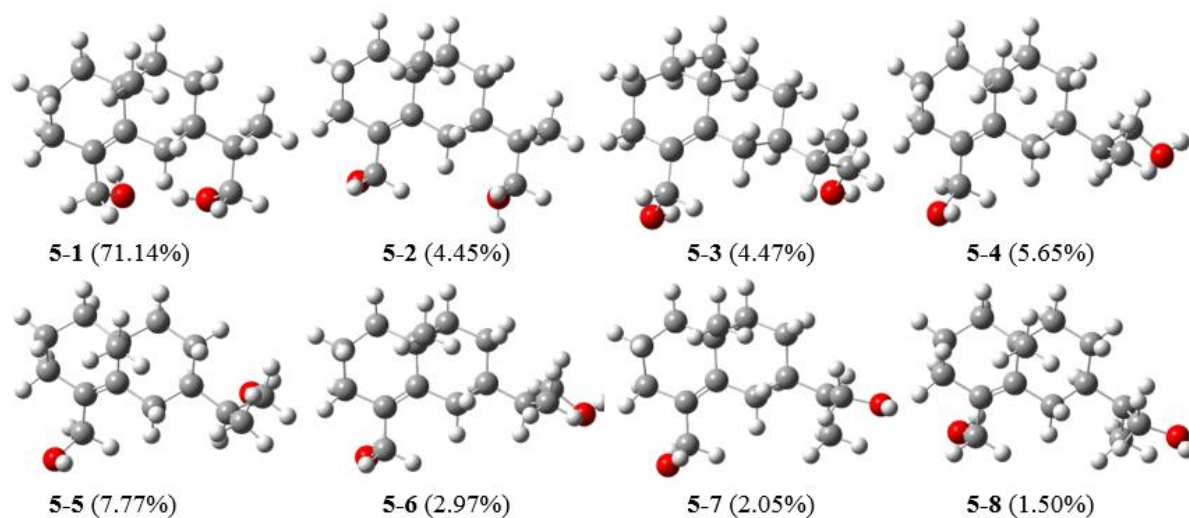

**Figure S5:** The lowest energy conformers of **5** (the relative populations are in parentheses).

**Table S1:** Extracted heats and weighting factors of the optimized conformersof **1–5** at B3LYP/6-31G(d,p) level.

|   |           | B3LYP/6-31G(d,p) |                                       |
|---|-----------|------------------|---------------------------------------|
|   | Conformer | Extracted heats  | Boltzmann-calculated contribution (%) |
| 1 | 1         | -810.42627       | 10.6                                  |
|   | 2         | -810.425526      | 4.82                                  |
|   | 3         | -810.425823      | 6.61                                  |
|   | 4         | -810.42599       | 7.88                                  |
|   | 5         | -810.424909      | 2.51                                  |
|   | 6         | -810.426552      | 14.3                                  |
|   | 7         | -810.427525      | 40.07                                 |
|   | 8         | -810.423792      | 0.77                                  |
|   | 9         | -810.424911      | 2.51                                  |
|   | 10        | -810.426023      | 8.16                                  |
|   | 11        | -810.424577      | 1.77                                  |
| 2 | 1         | -736.181953      | 7.08                                  |
|   | 2         | -736.183165      | 25.57                                 |
|   | 3         | -736.182711      | 15.81                                 |
|   | 4         | -736.183309      | 29.78                                 |
|   | 5         | -736.182518      | 12.89                                 |
|   | 6         | -736.182165      | 8.87                                  |
| 3 | 1         | -811.452558      | 45.36                                 |
|   | 2         | -811.451448      | 14.00                                 |
|   | 3         | -811.450288      | 4.10                                  |
|   | 4         | -811.449562      | 1.90                                  |
|   | 5         | -811.450176      | 3.64                                  |
|   | 6         | -811.451636      | 17.08                                 |
|   | 7         | -811.45043       | 4.76                                  |
|   | 8         | -811.451047      | 9.16                                  |
| 4 | 1         | -849.51583       | 41.32                                 |
|   | 2         | -849.514523      | 10.35                                 |
|   | 3         | -849.514104      | 6.64                                  |
|   | 4         | -849.514983      | 16.85                                 |
|   | 5         | -849.513751      | 4.57                                  |
|   | 6         | -849.514333      | 8.46                                  |
|   | 7         | -849.513963      | 5.72                                  |
|   | 8         | -849.514023      | 6.09                                  |
| 5 | 1         | -737.384987      | 71.14                                 |
|   | 2         | -737.38237       | 4.45                                  |
|   | 3         | -737.382375      | 4.47                                  |
|   | 4         | -737.382596      | 5.65                                  |



|  |   |             |      |
|--|---|-------------|------|
|  | 5 | -737.382896 | 7.77 |
|  | 6 | -737.381988 | 2.97 |
|  | 7 | -737.381638 | 2.05 |
|  | 8 | -737.381342 | 1.5  |

**Table S2.** The Cartesian coordinates of the lowest energy conformers for **1–5**

| <b>1-1</b> | X axis(Å) | Y axis(Å) | Z axis(Å) | <b>1-2</b> | X axis(Å) | Y axis(Å) | Z axis(Å) |
|------------|-----------|-----------|-----------|------------|-----------|-----------|-----------|
| C          | -1.3963   | -1.4589   | -0.5995   | C          | -1.1888   | -1.6092   | -0.4689   |
| C          | -0.5173   | -2.701    | -0.3208   | C          | -0.1583   | -2.6951   | -0.0635   |
| C          | 0.8191    | -2.425    | 0.3812    | C          | 1.1886    | -2.1799   | 0.4746    |
| C          | 1.6341    | -1.2305   | -0.1806   | C          | 1.8169    | -1.0318   | -0.3549   |
| C          | 0.705     | -0.0307   | -0.4031   | C          | 0.7293    | 0.0357    | -0.5441   |
| C          | -0.5323   | -0.3481   | -1.2251   | C          | -0.5008   | -0.4797   | -1.2678   |
| C          | 2.7577    | -0.9124   | 0.8489    | C          | 3.0766    | -0.4883   | 0.3789    |
| C          | 3.3461    | 0.4785    | 0.6543    | C          | 2.749     | 0.5582    | 1.4342    |
| C          | 2.2608    | 1.538     | 0.8198    | C          | 2.0205    | 1.7328    | 0.7914    |
| C          | 0.9895    | 1.1966    | 0.0916    | C          | 0.8471    | 1.2852    | -0.0365   |
| C          | -2.2859   | -0.9581   | 0.546     | C          | -2.0918   | -1.0843   | 0.6558    |
| C          | -2.0438   | -1.1379   | 1.8568    | C          | -1.7544   | -1.0252   | 1.9567    |
| C          | -3.5769   | -0.281    | 0.1309    | C          | -3.4896   | -0.6732   | 0.2416    |
| C          | 2.2979    | -1.634    | -1.5175   | C          | 2.319     | -1.5842   | -1.7108   |
| O          | -3.3213   | 0.9454    | -0.5273   | O          | -3.4539   | 0.4631    | -0.6015   |
| C          | 0.0252    | 2.3085    | -0.0357   | C          | -0.2281   | 2.2944    | -0.1656   |
| O          | -1.1235   | 2.3199    | 0.3702    | O          | -1.4098   | 2.1522    | 0.0906    |
| O          | 0.5678    | 3.3554    | -0.6765   | O          | 0.2672    | 3.4634    | -0.6052   |
| H          | -2.0994   | -1.789    | -1.3792   | H          | -1.8701   | -2.1193   | -1.1664   |
| H          | -1.0827   | -3.4472   | 0.2512    | H          | -0.5988   | -3.3884   | 0.6639    |
| H          | -0.295    | -3.1777   | -1.2852   | H          | 0.0493    | -3.3048   | -0.9531   |
| H          | 0.627     | -2.2654   | 1.4465    | H          | 1.0628    | -1.8569   | 1.5124    |
| H          | 1.4278    | -3.3385   | 0.3396    | H          | 1.8853    | -3.0277   | 0.5214    |
| H          | -1.1257   | 0.5407    | -1.445    | H          | -1.2006   | 0.3176    | -1.5211   |
| H          | -0.204    | -0.6831   | -2.2177   | H          | -0.201    | -0.8688   | -2.2482   |
| H          | 2.3638    | -0.9699   | 1.8729    | H          | 3.6345    | -1.3128   | 0.8406    |
| H          | 3.5563    | -1.6624   | 0.7898    | H          | 3.7624    | -0.0278   | -0.3462   |
| H          | 3.8067    | 0.5629    | -0.337    | H          | 3.6722    | 0.9127    | 1.9066    |
| H          | 4.1426    | 0.6532    | 1.3868    | H          | 2.1337    | 0.1197    | 2.2289    |
| H          | 2.6661    | 2.4962    | 0.4748    | H          | 2.7127    | 2.2983    | 0.1552    |
| H          | 2.0279    | 1.6563    | 1.8857    | H          | 1.6904    | 2.4082    | 1.5902    |
| H          | -2.7339   | -0.7711   | 2.6123    | H          | -2.4525   | -0.6563   | 2.7036    |

|            |         |         |         |            |         |         |         |
|------------|---------|---------|---------|------------|---------|---------|---------|
| H          | -1.1652 | -1.6378 | 2.2367  | H          | -0.7849 | -1.3211 | 2.331   |
| H          | -4.1441 | -0.9276 | -0.5467 | H          | -3.9836 | -1.4899 | -0.2948 |
| H          | -4.2246 | -0.0698 | 0.9887  | H          | -4.1186 | -0.4287 | 1.1045  |
| H          | 3.0373  | -2.4288 | -1.3648 | H          | 3.1584  | -2.2741 | -1.5623 |
| H          | 1.5745  | -2.0148 | -2.2455 | H          | 1.5534  | -2.1385 | -2.2611 |
| H          | 2.8135  | -0.7872 | -1.9838 | H          | 2.6671  | -0.7727 | -2.3608 |
| H          | -2.6516 | 1.4237  | 0.0085  | H          | -2.8303 | 1.1008  | -0.1901 |
| H          | -0.1615 | 4.0069  | -0.7261 | H          | -0.5188 | 4.0439  | -0.669  |
| <b>1-3</b> | X       | Y       | Z       | <b>1-4</b> | X       | Y       | Z       |
|            | axis(Å) | axis(Å) | axis(Å) |            | axis(Å) | axis(Å) | axis(Å) |
| C          | -1.307  | -1.5306 | -0.7969 | C          | -1.8802 | -0.7691 | -0.9117 |
| C          | -0.4232 | -2.7431 | -0.4303 | C          | -1.5885 | -2.1926 | -0.4017 |
| C          | 0.7957  | -2.4054 | 0.4362  | C          | -0.345  | -2.3143 | 0.4828  |
| C          | 1.6531  | -1.2176 | -0.0725 | C          | 0.9279  | -1.6412 | -0.0901 |
| C          | 0.7399  | -0.0351 | -0.4252 | C          | 0.6002  | -0.202  | -0.5014 |
| C          | -0.4157 | -0.3951 | -1.3458 | C          | -0.6068 | -0.0584 | -1.4116 |
| C          | 2.6583  | -0.8609 | 1.0604  | C          | 2.0156  | -1.6936 | 1.0218  |
| C          | 3.2659  | 0.5227  | 0.8806  | C          | 3.1573  | -0.719  | 0.7631  |
| C          | 2.1709  | 1.5842  | 0.8849  | C          | 2.6299  | 0.7107  | 0.7019  |
| C          | 0.977   | 1.2128  | 0.045   | C          | 1.361   | 0.8412  | -0.0943 |
| C          | -2.3004 | -1.0368 | 0.2589  | C          | -2.7488 | 0.1006  | 0.0033  |
| C          | -2.3176 | -1.4097 | 1.552   | C          | -3.7884 | 0.7807  | -0.5196 |
| C          | -3.39   | -0.1143 | -0.2511 | C          | -2.4864 | 0.1759  | 1.4803  |
| C          | 2.4572  | -1.6461 | -1.3218 | C          | 1.4409  | -2.4311 | -1.3159 |
| O          | -3.5003 | 1.0296  | 0.5809  | O          | -1.271  | 0.8781  | 1.7043  |
| C          | 0.0354  | 2.3212  | -0.2204 | C          | 1.0228  | 2.2453  | -0.4303 |
| O          | -1.1633 | 2.3197  | -0.0042 | O          | 1.75    | 2.9765  | -1.0804 |
| O          | 0.6601  | 3.3839  | -0.7507 | O          | -0.1348 | 2.6399  | 0.1357  |
| H          | -1.9356 | -1.8762 | -1.6316 | H          | -2.4887 | -0.9283 | -1.8166 |
| H          | -1.0209 | -3.5194 | 0.063   | H          | -2.4584 | -2.5939 | 0.1329  |
| H          | -0.0654 | -3.1999 | -1.3625 | H          | -1.4529 | -2.8477 | -1.2722 |
| H          | 0.4533  | -2.1918 | 1.4543  | H          | -0.5713 | -1.888  | 1.4663  |
| H          | 1.4217  | -3.3035 | 0.523   | H          | -0.1499 | -3.3796 | 0.6648  |
| H          | -1.0211 | 0.4739  | -1.6147 | H          | -0.8391 | 0.9859  | -1.6445 |
| H          | 0.007   | -0.7222 | -2.305  | H          | -0.3333 | -0.4955 | -2.3817 |
| H          | 2.1555  | -0.8841 | 2.037   | H          | 1.5738  | -1.4465 | 1.9971  |
| H          | 3.4579  | -1.6104 | 1.1138  | H          | 2.4151  | -2.7109 | 1.1187  |
| H          | 3.8342  | 0.5723  | -0.0554 | H          | 3.6696  | -0.9705 | -0.1727 |
| H          | 3.9765  | 0.7268  | 1.6898  | H          | 3.9053  | -0.7993 | 1.5602  |
| H          | 2.6152  | 2.5267  | 0.5447  | H          | 3.4162  | 1.3511  | 0.2846  |
| H          | 1.8292  | 1.7482  | 1.9149  | H          | 2.4353  | 1.0675  | 1.7214  |
| H          | -3.0784 | -1.02   | 2.2255  | H          | -4.4323 | 1.4059  | 0.0926  |
| H          | -1.61   | -2.1001 | 1.9888  | H          | -4.0173 | 0.7513  | -1.5813 |

|            |         |         |         |            |         |         |         |
|------------|---------|---------|---------|------------|---------|---------|---------|
| H          | -3.2104 | 0.2252  | -1.2751 | H          | -3.2815 | 0.719   | 2.0035  |
| H          | -4.3513 | -0.6396 | -0.2508 | H          | -2.4313 | -0.8189 | 1.9292  |
| H          | 3.1709  | -2.4409 | -1.0755 | H          | 1.7292  | -3.4501 | -1.0327 |
| H          | 1.8171  | -2.0338 | -2.1204 | H          | 0.6859  | -2.5219 | -2.1031 |
| H          | 3.0257  | -0.8094 | -1.7426 | H          | 2.3167  | -1.9523 | -1.7674 |
| H          | -2.6437 | 1.5028  | 0.5013  | H          | -1.1415 | 0.8692  | 2.6716  |
| H          | -0.0547 | 4.0401  | -0.8827 | H          | -0.5778 | 1.9137  | 0.6434  |
| <b>1-5</b> | X       | Y       | Z       | <b>1-6</b> | X       | Y       | Z       |
|            | axis(Å) | axis(Å) | axis(Å) |            | axis(Å) | axis(Å) | axis(Å) |
| C          | -0.9711 | -1.7554 | -0.6651 | C          | 1.8218  | -0.2982 | 0.6513  |
| C          | 0.1144  | -2.739  | -0.1634 | C          | 1.7048  | -1.8248 | 0.5104  |
| C          | 1.32    | -2.0875 | 0.5347  | C          | 0.5265  | -2.2341 | -0.3711 |
| C          | 1.9327  | -0.8921 | -0.237  | C          | -0.8393 | -1.6852 | 0.1148  |
| C          | 0.7818  | 0.0755  | -0.5559 | C          | -0.7607 | -0.1738 | 0.3689  |
| C          | -0.3204 | -0.5524 | -1.3912 | C          | 0.4738  | 0.2974  | 1.1296  |
| C          | 3.0551  | -0.242  | 0.6225  | C          | -1.8853 | -2.0361 | -0.9809 |
| C          | 2.5279  | 0.7797  | 1.6183  | C          | -3.1912 | -1.2718 | -0.81   |
| C          | 1.7844  | 1.8848  | 0.878   | C          | -2.9399 | 0.2306  | -0.854  |
| C          | 0.7455  | 1.3365  | -0.0634 | C          | -1.7367 | 0.6625  | -0.0608 |
| C          | -2.0181 | -1.3068 | 0.3592  | C          | 2.4584  | 0.3476  | -0.5882 |
| C          | -1.899  | -1.4174 | 1.6952  | C          | 1.7965  | 1.0658  | -1.5135 |
| C          | -3.2987 | -0.7484 | -0.2301 | C          | 3.9522  | 0.1599  | -0.7268 |
| C          | 2.6247  | -1.3978 | -1.526  | C          | -1.2481 | -2.386  | 1.4325  |
| O          | -3.6867 | 0.4338  | 0.4529  | O          | 4.6076  | 0.8593  | 0.3203  |
| C          | -0.381  | 2.2603  | -0.3265 | C          | -1.7193 | 2.1169  | 0.2031  |
| O          | -1.5705 | 2.0187  | -0.2364 | O          | -1.82   | 2.9908  | -0.6379 |
| O          | 0.0694  | 3.475   | -0.6822 | O          | -1.6702 | 2.3912  | 1.5166  |
| H          | -1.5396 | -2.3184 | -1.4208 | H          | 2.523   | -0.1069 | 1.4764  |
| H          | -0.3265 | -3.4948 | 0.4983  | H          | 2.6242  | -2.257  | 0.0999  |
| H          | 0.4865  | -3.3006 | -1.0304 | H          | 1.593   | -2.2698 | 1.5064  |
| H          | 1.0232  | -1.7614 | 1.537   | H          | 0.7246  | -1.891  | -1.3952 |
| H          | 2.0844  | -2.86   | 0.6924  | H          | 0.4887  | -3.3302 | -0.4223 |
| H          | -1.0771 | 0.1732  | -1.6988 | H          | 0.5703  | 1.3883  | 1.1278  |
| H          | 0.1052  | -0.897  | -2.3414 | H          | 0.3316  | 0.017   | 2.1822  |
| H          | 3.624   | -1.0144 | 1.1553  | H          | -1.4816 | -1.8009 | -1.9755 |
| H          | 3.7776  | 0.2693  | -0.0292 | H          | -2.0897 | -3.1142 | -0.9814 |
| H          | 3.3605  | 1.2124  | 2.1847  | H          | -3.6731 | -1.5436 | 0.136   |
| H          | 1.8647  | 0.2974  | 2.3463  | H          | -3.8924 | -1.549  | -1.6057 |
| H          | 2.4953  | 2.4974  | 0.3097  | H          | -3.8395 | 0.7423  | -0.49   |
| H          | 1.3175  | 2.5395  | 1.6242  | H          | -2.7968 | 0.5413  | -1.8969 |
| H          | -2.7031 | -1.085  | 2.3486  | H          | 2.3092  | 1.5056  | -2.3649 |
| H          | -1.0305 | -1.8319 | 2.1875  | H          | 0.7289  | 1.2429  | -1.4726 |
| H          | -3.1976 | -0.5036 | -1.2914 | H          | 4.2315  | -0.8956 | -0.6721 |

|            |              |              |              |            |              |              |              |
|------------|--------------|--------------|--------------|------------|--------------|--------------|--------------|
| H          | -4.1031      | -1.4862      | -0.1409      | H          | 4.3319       | 0.546        | -1.679       |
| H          | 3.4894       | -2.0263      | -1.2814      | H          | -1.331       | -3.4697      | 1.2907       |
| H          | 1.9697       | -2           | -2.1617      | H          | -0.5252      | -2.219       | 2.2373       |
| H          | 2.985        | -0.5585      | -2.1328      | H          | -2.2147      | -2.0262      | 1.8016       |
| H          | -2.9446      | 1.0643       | 0.3251       | H          | 4.2495       | 1.7635       | 0.3124       |
| H          | -0.7455      | 3.9979       | -0.8287      | H          | -1.705       | 3.3686       | 1.5533       |
| <b>1-7</b> | X<br>axis(Å) | Y<br>axis(Å) | Z<br>axis(Å) | <b>1-8</b> | X<br>axis(Å) | Y<br>axis(Å) | Z<br>axis(Å) |
| C          | 1.8293       | -0.3432      | 0.6339       | C          | 1.3444       | -1.528       | 0.7593       |
| C          | 1.7029       | -1.8617      | 0.429        | C          | 0.4149       | -2.7337      | 0.4954       |
| C          | 0.5018       | -2.2304      | -0.44        | C          | -0.7998      | -2.4008      | -0.3778      |
| C          | -0.8488      | -1.6948      | 0.0999       | C          | -1.6244      | -1.1807      | 0.1031       |
| C          | -0.7564      | -0.1923      | 0.4002       | C          | -0.6923      | -0.0052      | 0.4193       |
| C          | 0.4937       | 0.2415       | 1.159        | C          | 0.5003       | -0.3499      | 1.2984       |
| C          | -1.926       | -2.0068      | -0.9765      | C          | -2.6369      | -0.8313      | -1.0268      |
| C          | -3.2229      | -1.2446      | -0.7411      | C          | -3.2341      | 0.5618       | -0.8672      |
| C          | -2.9657      | 0.2575       | -0.7494      | C          | -2.133       | 1.6168       | -0.8847      |
| C          | -1.7338      | 0.6644       | 0.0153       | C          | -0.9475      | 1.2393       | -0.0451      |
| C          | 2.4506       | 0.3496       | -0.5878      | C          | 2.3112       | -1.1381      | -0.3707      |
| C          | 1.7737       | 1.0863       | -1.4872      | C          | 2.3313       | -1.6843      | -1.6009      |
| C          | 3.9457       | 0.1828       | -0.7403      | C          | 3.395        | -0.1443      | -0.0071      |
| C          | -1.2249      | -2.4384      | 1.4043       | C          | -2.4203      | -1.5556      | 1.3754       |
| O          | 4.6021       | 0.8514       | 0.326        | O          | 2.9251       | 1.1842       | -0.1567      |
| C          | -1.688       | 2.1001       | 0.3737       | C          | -0.0648      | 2.367        | 0.2974       |
| O          | -1.4899      | 2.5756       | 1.4755       | O          | 0.009        | 2.9284       | 1.3729       |
| O          | -1.9082      | 2.8733       | -0.7027      | O          | 0.6949       | 2.7019       | -0.7588      |
| H          | 2.5446       | -0.1913      | 1.4552       | H          | 1.9998       | -1.8459      | 1.5844       |
| H          | 2.6106       | -2.2774      | -0.0229      | H          | 0.9749       | -3.5641      | 0.0484       |
| H          | 1.6144       | -2.3497      | 1.407        | H          | 0.0577       | -3.1139      | 1.4613       |
| H          | 0.677        | -1.8477      | -1.4542      | H          | -0.4597      | -2.2236      | -1.4039      |
| H          | 0.4568       | -3.3233      | -0.5333      | H          | -1.4455      | -3.2873      | -0.4321      |
| H          | 0.6001       | 1.33         | 1.1999       | H          | 1.1429       | 0.5127       | 1.4912       |
| H          | 0.3671       | -0.0794      | 2.2019       | H          | 0.116        | -0.6255      | 2.2896       |
| H          | -1.55        | -1.7401      | -1.974       | H          | -2.1409      | -0.8753      | -2.0063      |
| H          | -2.1346      | -3.0837      | -1.0066      | H          | -3.4431      | -1.5748      | -1.0609      |
| H          | -3.6763      | -1.5423      | 0.2111       | H          | -3.8031      | 0.6283       | 0.0673       |
| H          | -3.95        | -1.4956      | -1.5222      | H          | -3.9432      | 0.7594       | -1.6794      |
| H          | -3.8503      | 0.7624       | -0.3422      | H          | -2.5563      | 2.5687       | -0.5419      |
| H          | -2.8565      | 0.5927       | -1.7889      | H          | -1.7952      | 1.7705       | -1.9174      |
| H          | 2.2759       | 1.5576       | -2.3279      | H          | 3.0716       | -1.3836      | -2.3385      |
| H          | 0.7038       | 1.2438       | -1.4346      | H          | 1.6369       | -2.4489      | -1.9256      |
| H          | 4.2352       | -0.8713      | -0.7241      | H          | 3.7325       | -0.2869      | 1.0244       |
| H          | 4.3152       | 0.6059       | -1.6807      | H          | 4.276        | -0.2597      | -0.6481      |

|            |         |         |         |             |         |         |         |
|------------|---------|---------|---------|-------------|---------|---------|---------|
| H          | -1.3187 | -3.5161 | 1.2278  | H           | -3.1384 | -2.3572 | 1.1667  |
| H          | -0.4791 | -2.3037 | 2.194   | H           | -1.7741 | -1.9099 | 2.1846  |
| H          | -2.1783 | -2.0862 | 1.8129  | H           | -2.9831 | -0.7013 | 1.7673  |
| H          | 4.2086  | 1.7393  | 0.3798  | H           | 2.2493  | 1.1743  | -0.8607 |
| H          | -1.8525 | 3.7832  | -0.3446 | H           | 1.3049  | 3.3748  | -0.386  |
| <b>1-9</b> | X       | Y       | Z       | <b>1-10</b> | X       | Y       | Z       |
|            | axis(Å) | axis(Å) | axis(Å) |             | axis(Å) | axis(Å) | axis(Å) |
| C          | 1.6314  | -1.1012 | 0.6224  | C           | -1.9793 | -0.4815 | -0.9318 |
| C          | 0.9696  | -2.4938 | 0.536   | C           | -1.8844 | -1.9812 | -0.6058 |
| C          | -0.3348 | -2.49   | -0.2679 | C           | -0.775  | -2.3239 | 0.3848  |
| C          | -1.3726 | -1.4326 | 0.1932  | C           | 0.6145  | -1.7578 | -0.0015 |
| C          | -0.7001 | -0.0664 | 0.3949  | C           | 0.5413  | -0.2725 | -0.3903 |
| C          | 0.5924  | -0.1087 | 1.1957  | C           | -0.6015 | 0.1013  | -1.3212 |
| C          | -2.4861 | -1.3796 | -0.8926 | C           | 1.5569  | -1.9816 | 1.2132  |
| C          | -3.3577 | -0.1363 | -0.7761 | C           | 2.8863  | -1.254  | 1.0622  |
| C          | -2.5067 | 1.1208  | -0.9158 | C           | 2.67    | 0.2447  | 0.8867  |
| C          | -1.2386 | 1.0687  | -0.11   | C           | 1.5012  | 0.5986  | 0.0055  |
| C          | 2.3411  | -0.5917 | -0.6466 | C           | -2.7782 | 0.29    | 0.1239  |
| C          | 2.4906  | -1.3015 | -1.7811 | C           | -4.0928 | 0.5174  | -0.0671 |
| C          | 2.9594  | 0.7875  | -0.5706 | C           | -2.1189 | 0.7779  | 1.3824  |
| C          | -2.0115 | -1.88   | 1.5293  | C           | 1.1647  | -2.5516 | -1.2132 |
| O          | 3.868   | 0.8334  | 0.5195  | O           | -1.4594 | 2.0053  | 1.1033  |
| C          | -0.6264 | 2.3983  | 0.0843  | C           | 1.5845  | 1.9836  | -0.5194 |
| O          | -0.2827 | 3.158   | -0.8022 | O           | 2.4558  | 2.3474  | -1.292  |
| O          | -0.5622 | 2.7346  | 1.3825  | O           | 0.657   | 2.8046  | -0.0017 |
| H          | 2.4262  | -1.1962 | 1.3766  | H           | -2.5749 | -0.4212 | -1.8563 |
| H          | 1.6638  | -3.2314 | 0.1164  | H           | -2.8416 | -2.3524 | -0.2179 |
| H          | 0.7578  | -2.8456 | 1.5539  | H           | -1.7124 | -2.5329 | -1.5386 |
| H          | -0.0944 | -2.3253 | -1.3246 | H           | -1.0687 | -1.9723 | 1.3796  |
| H          | -0.7798 | -3.4926 | -0.2202 | H           | -0.7153 | -3.4169 | 0.4755  |
| H          | 1.0509  | 0.8758  | 1.311   | H           | -0.7006 | 1.1835  | -1.4506 |
| H          | 0.3458  | -0.413  | 2.2216  | H           | -0.3422 | -0.2839 | -2.317  |
| H          | -2.0371 | -1.3834 | -1.8954 | H           | 1.0735  | -1.6251 | 2.1334  |
| H          | -3.1161 | -2.2763 | -0.8384 | H           | 1.7427  | -3.0532 | 1.3589  |
| H          | -3.8859 | -0.1281 | 0.1843  | H           | 3.4445  | -1.6524 | 0.2074  |
| H          | -4.1277 | -0.1457 | -1.5562 | H           | 3.5108  | -1.4321 | 1.9456  |
| H          | -3.1136 | 1.984   | -0.616  | H           | 3.5981  | 0.6826  | 0.4997  |
| H          | -2.2436 | 1.2663  | -1.9714 | H           | 2.4965  | 0.6969  | 1.8719  |
| H          | 3.0148  | -0.8916 | -2.6407 | H           | -4.6959 | 1.0518  | 0.6617  |
| H          | 2.1116  | -2.3088 | -1.9059 | H           | -4.6092 | 0.171   | -0.9585 |
| H          | 3.5162  | 1.0438  | -1.4787 | H           | -2.8463 | 0.9598  | 2.1816  |
| H          | 2.2011  | 1.5619  | -0.4348 | H           | -1.3882 | 0.0743  | 1.7794  |
| H          | -2.5526 | -2.8256 | 1.4084  | H           | 1.2981  | -3.6099 | -0.9611 |

|             |              |              |              |   |         |         |         |
|-------------|--------------|--------------|--------------|---|---------|---------|---------|
| H           | -1.2677      | -2.0369      | 2.3168       | H | 0.495   | -2.5074 | -2.0782 |
| H           | -2.7238      | -1.1377      | 1.9063       | H | 2.134   | -2.167  | -1.5488 |
| H           | 4.4936       | 0.1014       | 0.3835       | H | -2.1616 | 2.6112  | 0.7918  |
| H           | -0.1597      | 3.6267       | 1.3751       | H | -0.0108 | 2.3397  | 0.5608  |
| <b>1-11</b> | X<br>axis(Å) | Y<br>axis(Å) | Z<br>axis(Å) |   |         |         |         |
| C           | -1.9252      | -0.6804      | -0.9093      |   |         |         |         |
| C           | -1.6901      | -2.1245      | -0.4318      |   |         |         |         |
| C           | -0.4507      | -2.313       | 0.4455       |   |         |         |         |
| C           | 0.8494       | -1.682       | -0.1177      |   |         |         |         |
| C           | 0.583        | -0.2217      | -0.5018      |   |         |         |         |
| C           | -0.6252      | -0.0122      | -1.3978      |   |         |         |         |
| C           | 1.9325       | -1.8065      | 0.9931       |   |         |         |         |
| C           | 3.1064       | -0.8638      | 0.7681       |   |         |         |         |
| C           | 2.6251       | 0.5831       | 0.7536       |   |         |         |         |
| C           | 1.378        | 0.7827       | -0.0628      |   |         |         |         |
| C           | -2.7566      | 0.208        | 0.0206       |   |         |         |         |
| C           | -3.7545      | 0.9567       | -0.4899      |   |         |         |         |
| C           | -2.5034      | 0.2274       | 1.5052       |   |         |         |         |
| C           | 1.3283       | -2.4679      | -1.3594      |   |         |         |         |
| O           | -1.2425      | 0.7958       | 1.7981       |   |         |         |         |
| C           | 1.0178       | 2.1929       | -0.3084      |   |         |         |         |
| O           | -0.0237      | 2.7335       | 0.0216       |   |         |         |         |
| O           | 1.9945       | 2.8484       | -0.9533      |   |         |         |         |
| H           | -2.541       | -0.7964      | -1.8159      |   |         |         |         |
| H           | -2.5741      | -2.5026      | 0.0966       |   |         |         |         |
| H           | -1.5819      | -2.7656      | -1.3165      |   |         |         |         |
| H           | -0.66        | -1.8959      | 1.437        |   |         |         |         |
| H           | -0.299       | -3.3885      | 0.6076       |   |         |         |         |
| H           | -0.8176      | 1.0439       | -1.6113      |   |         |         |         |
| H           | -0.3741      | -0.4397      | -2.3783      |   |         |         |         |
| H           | 1.4976       | -1.5758      | 1.9754       |   |         |         |         |
| H           | 2.2971       | -2.8393      | 1.0585       |   |         |         |         |
| H           | 3.6123       | -1.1014      | -0.1749      |   |         |         |         |
| H           | 3.8489       | -0.9947      | 1.5637       |   |         |         |         |
| H           | 3.4423       | 1.21         | 0.3782       |   |         |         |         |
| H           | 2.4213       | 0.9078       | 1.782        |   |         |         |         |
| H           | -4.3712      | 1.5929       | 0.1388       |   |         |         |         |
| H           | -3.9774      | 0.9672       | -1.5527      |   |         |         |         |
| H           | -3.2578      | 0.8212       | 2.0337       |   |         |         |         |
| H           | -2.5538      | -0.779       | 1.9291       |   |         |         |         |
| H           | 1.5678       | -3.5053      | -1.0985      |   |         |         |         |
| H           | 0.5721       | -2.5058      | -2.1498      |   |         |         |         |

|            |              |              |              |            |              |              |              |
|------------|--------------|--------------|--------------|------------|--------------|--------------|--------------|
| H          | 2.2272       | -2.0207      | -1.7977      |            |              |              |              |
| H          | -1.1354      | 1.5763       | 1.2166       |            |              |              |              |
| H          | 1.6404       | 3.7549       | -1.0583      |            |              |              |              |
| <b>2-1</b> | X<br>axis(Å) | Y<br>axis(Å) | Z<br>axis(Å) | <b>2-2</b> | X<br>axis(Å) | Y<br>axis(Å) | Z<br>axis(Å) |
| C          | -3.8776      | -0.7045      | 0.0523       | C          | -3.9174      | -0.5331      | -0.2083      |
| C          | -3.699       | 0.7758       | -0.2565      | C          | -3.595       | 0.8762       | -0.6873      |
| C          | -2.3052      | 1.3122       | 0.0044       | C          | -2.2171      | 1.3704       | -0.2945      |
| C          | -1.2418      | 0.5013       | 0.2295       | C          | -1.2558      | 0.541        | 0.1808       |
| C          | -1.3523      | -1.0342      | 0.1641       | C          | -1.4562      | -0.9807      | 0.2827       |
| C          | -2.6914      | -1.4961      | -0.4724      | C          | -2.735       | -1.453       | -0.4625      |
| C          | 0.1536       | 1.0082       | 0.5698       | C          | 0.0995       | 1.0115       | 0.6822       |
| C          | 1.2226       | 0.4443       | -0.3844      | C          | 1.2773       | 0.2975       | -0.0145      |
| C          | 1.181        | -1.0995      | -0.3465      | C          | 1.1246       | -1.2389      | 0.096        |
| C          | -0.213       | -1.6114      | -0.7156      | C          | -0.2575      | -1.7023      | -0.3767      |
| C          | 2.5939       | 1.0594       | -0.0844      | C          | 2.6379       | 0.7833       | 0.5108       |
| C          | 3.0542       | 2.0896       | -0.819       | C          | 2.9162       | 0.9564       | 1.8165       |
| C          | 3.4115       | 0.4957       | 1.0424       | C          | 3.6801       | 1.0743       | -0.5348      |
| O          | 3.9646       | -0.7394      | 0.6084       | O          | 4.0428       | -0.1577      | -1.1399      |
| C          | -2.2619      | 2.8206       | -0.0227      | C          | -2.0649      | 2.8586       | -0.4903      |
| O          | 2.114        | -1.6523      | -1.2768      | O          | 2.0704       | -1.9327      | -0.726       |
| C          | -1.2617      | -1.6163      | 1.5946       | C          | -1.5721      | -1.3967      | 1.7674       |
| H          | -3.9919      | -0.852       | 1.1321       | H          | -4.1717      | -0.5194      | 0.8577       |
| H          | -4.8033      | -1.0661      | -0.4103      | H          | -4.8028      | -0.906       | -0.7361      |
| H          | -4.4291      | 1.339        | 0.3381       | H          | -4.3591      | 1.5548       | -0.2884      |
| H          | -3.942       | 0.9544       | -1.3119      | H          | -3.6744      | 0.9138       | -1.7814      |
| H          | -2.8533      | -2.5661      | -0.291       | H          | -2.995       | -2.4776      | -0.1684      |
| H          | -2.6554      | -1.3742      | -1.5638      | H          | -2.5552      | -1.4847      | -1.546       |
| H          | 0.2119       | 2.0993       | 0.5636       | H          | 0.2337       | 2.0908       | 0.5732       |
| H          | 0.3832       | 0.7222       | 1.6043       | H          | 0.125        | 0.8356       | 1.7641       |
| H          | 0.9548       | 0.7443       | -1.4095      | H          | 1.2296       | 0.5635       | -1.081       |
| H          | 1.449        | -1.4794      | 0.6455       | H          | 1.297        | -1.5669      | 1.1272       |
| H          | -0.395       | -1.3703      | -1.7731      | H          | -0.3         | -1.5665      | -1.4678      |
| H          | -0.2168      | -2.7091      | -0.6719      | H          | -0.3401      | -2.7879      | -0.2273      |
| H          | 4.0268       | 2.5351       | -0.6328      | H          | 3.8932       | 1.2974       | 2.1477       |
| H          | 2.4764       | 2.5049       | -1.6399      | H          | 2.1965       | 0.7385       | 2.5987       |
| H          | 4.235        | 1.1629       | 1.3192       | H          | 3.2857       | 1.7525       | -1.2985      |
| H          | 2.7985       | 0.3266       | 1.9329       | H          | 4.5807       | 1.5264       | -0.1063      |
| H          | 4.5731       | -1.0301      | 1.3099       | H          | 4.7079       | 0.0539       | -1.8186      |
| H          | -1.264       | 3.2332       | -0.178       | H          | -1.0277      | 3.193        | -0.5454      |
| H          | -2.8729      | 3.1995       | -0.8501      | H          | -2.5271      | 3.1625       | -1.4365      |
| H          | -2.6655      | 3.2242       | 0.9114       | H          | -2.5638      | 3.3973       | 0.3215       |
| H          | 2.9972       | -1.3905      | -0.9369      | H          | 2.9003       | -1.4082      | -0.7384      |

|            |              |              |              |            |              |              |              |
|------------|--------------|--------------|--------------|------------|--------------|--------------|--------------|
| H          | -1.3822      | -2.7057      | 1.5823       | H          | -1.7764      | -2.4698      | 1.8589       |
| H          | -0.3007      | -1.4074      | 2.0745       | H          | -0.6555      | -1.2005      | 2.3323       |
| H          | -2.0374      | -1.2045      | 2.2493       | H          | -2.3814      | -0.8605      | 2.275        |
| <b>2-3</b> | X<br>axis(Å) | Y<br>axis(Å) | Z<br>axis(Å) | <b>2-4</b> | X<br>axis(Å) | Y<br>axis(Å) | Z<br>axis(Å) |
| C          | -3.8915      | -0.693       | 0.0342       | C          | -3.9195      | -0.5837      | -0.2007      |
| C          | -3.7014      | 0.7818       | -0.2938      | C          | -3.621       | 0.8253       | -0.696       |
| C          | -2.3079      | 1.3144       | -0.0241      | C          | -2.2503      | 1.3464       | -0.3128      |
| C          | -1.2518      | 0.5013       | 0.2259       | C          | -1.2752      | 0.5409       | 0.175        |
| C          | -1.3697      | -1.0339      | 0.181        | C          | -1.4523      | -0.9814      | 0.3021       |
| C          | -2.7034      | -1.4982      | -0.4649      | C          | -2.7203      | -1.486       | -0.4399      |
| C          | 0.1415       | 1.0055       | 0.5772       | C          | 0.0753       | 1.0439       | 0.6623       |
| C          | 1.2208       | 0.4263       | -0.3571      | C          | 1.2545       | 0.3393       | -0.0409      |
| C          | 1.1697       | -1.1178      | -0.2989      | C          | 1.1301       | -1.1912      | 0.1292       |
| C          | -0.223       | -1.627       | -0.6776      | C          | -0.2386      | -1.6975      | -0.3388      |
| C          | 2.5865       | 1.0479       | -0.0416      | C          | 2.6273       | 0.8598       | 0.4108       |
| C          | 3.0164       | 2.1329       | -0.7127      | C          | 2.9125       | 1.2392       | 1.6706       |
| C          | 3.4279       | 0.4292       | 1.036        | C          | 3.6796       | 0.9803       | -0.6686      |
| O          | 4.0955       | -0.6937      | 0.4742       | O          | 4.2499       | -0.2849      | -0.9527      |
| C          | -2.2556      | 2.822        | -0.0719      | C          | -2.1203      | 2.8335       | -0.5351      |
| O          | 2.1073       | -1.689       | -1.2128      | O          | 2.1278       | -1.8525      | -0.663       |
| C          | -1.2984      | -1.5971      | 1.62         | C          | -1.5682      | -1.3721      | 1.7937       |
| H          | -4.0193      | -0.8242      | 1.1146       | H          | -4.1775      | -0.5613      | 0.8642       |
| H          | -4.8136      | -1.0565      | -0.4341      | H          | -4.7966      | -0.9787      | -0.7262      |
| H          | -4.4354      | 1.3573       | 0.2838       | H          | -4.395       | 1.4962       | -0.3033      |
| H          | -3.9309      | 0.9463       | -1.3546      | H          | -3.7034      | 0.8486       | -1.7903      |
| H          | -2.8732      | -2.5646      | -0.2701      | H          | -2.963       | -2.511       | -0.1326      |
| H          | -2.6539      | -1.3922      | -1.5575      | H          | -2.5368      | -1.5289      | -1.5224      |
| H          | 0.2029       | 2.0963       | 0.5604       | H          | 0.1881       | 2.1241       | 0.5403       |
| H          | 0.3591       | 0.7305       | 1.6175       | H          | 0.1158       | 0.8766       | 1.7453       |
| H          | 0.9714       | 0.7151       | -1.39        | H          | 1.1678       | 0.569        | -1.1134      |
| H          | 1.4255       | -1.4871      | 0.7004       | H          | 1.3077       | -1.4728      | 1.1736       |
| H          | -0.3914      | -1.3984      | -1.7402      | H          | -0.2787      | -1.5905      | -1.433       |
| H          | -0.2328      | -2.7241      | -0.6204      | H          | -0.3009      | -2.78        | -0.1609      |
| H          | 3.9778       | 2.5933       | -0.5052      | H          | 3.9012       | 1.6069       | 1.9339       |
| H          | 2.4149       | 2.5904       | -1.4938      | H          | 2.1963       | 1.1742       | 2.4816       |
| H          | 4.1807       | 1.1215       | 1.4288       | H          | 3.2528       | 1.394        | -1.5881      |
| H          | 2.8169       | 0.099        | 1.8813       | H          | 4.492        | 1.65         | -0.3668      |
| H          | 4.7805       | -0.3263      | -0.1144      | H          | 3.5123       | -0.9319      | -0.9583      |
| H          | -1.2542      | 3.226        | -0.228       | H          | -1.0881      | 3.1801       | -0.6077      |
| H          | -2.8597      | 3.1932       | -0.9079      | H          | -2.5965      | 3.1155       | -1.4812      |
| H          | -2.6618      | 3.2411       | 0.8541       | H          | -2.6178      | 3.3791       | 0.2729       |
| H          | 2.9843       | -1.5403      | -0.8016      | H          | 2.0432       | -2.8079      | -0.4884      |



|            |              |              |              |            |              |              |              |
|------------|--------------|--------------|--------------|------------|--------------|--------------|--------------|
| H          | -1.4245      | -2.686       | 1.621        | H          | -1.7564      | -2.4464      | 1.9039       |
| H          | -0.3419      | -1.3868      | 2.1081       | H          | -0.6573      | -1.1512      | 2.3587       |
| H          | -2.0794      | -1.1725      | 2.2601       | H          | -2.3878      | -0.8394      | 2.2884       |
| <b>2-5</b> | X<br>axis(Å) | Y<br>axis(Å) | Z<br>axis(Å) | <b>2-6</b> | X<br>axis(Å) | Y<br>axis(Å) | Z<br>axis(Å) |
| C          | -3.9291      | -0.6661      | -0.0327      | C          | -3.897       | -0.5156      | -0.2752      |
| C          | -3.694       | 0.7212       | -0.6159      | C          | -3.5606      | 0.9115       | -0.6866      |
| C          | -2.3188      | 1.2924       | -0.3338      | C          | -2.1889      | 1.3847       | -0.2479      |
| C          | -1.2994      | 0.5333       | 0.1377       | C          | -1.2397      | 0.5356       | 0.217        |
| C          | -1.4284      | -0.9825      | 0.3444       | C          | -1.4501      | -0.9893      | 0.2608       |
| C          | -2.7237      | -1.5529      | -0.2966      | C          | -2.7098      | -1.4279      | -0.5352      |
| C          | 0.0585       | 1.0862       | 0.5338       | C          | 0.1116       | 0.9867       | 0.7533       |
| C          | 1.2436       | 0.3958       | -0.183       | C          | 1.2803       | 0.2873       | 0.0326       |
| C          | 1.1513       | -1.1405      | 0.0214       | C          | 1.1264       | -1.2473      | 0.141        |
| C          | -0.2364      | -1.6851      | -0.3409      | C          | -0.2368      | -1.7038      | -0.3866      |
| C          | 2.6139       | 0.9871       | 0.2207       | C          | 2.6537       | 0.7585       | 0.5191       |
| C          | 2.8288       | 1.7843       | 1.2855       | C          | 2.984        | 0.8679       | 1.8189       |
| C          | 3.7659       | 0.6847       | -0.7026      | C          | 3.6465       | 1.1061       | -0.5613      |
| O          | 4.3159       | -0.5681      | -0.3136      | O          | 3.8829       | -0.0341      | -1.3734      |
| C          | -2.2378      | 2.7689       | -0.6333      | C          | -2.0279      | 2.8786       | -0.3891      |
| O          | 2.0557       | -1.8505      | -0.8312      | O          | 2.136        | -1.9286      | -0.6139      |
| C          | -1.4427      | -1.3127      | 1.8546       | C          | -1.6122      | -1.4493      | 1.7285       |
| H          | -4.1249      | -0.5939      | 1.0433       | H          | -4.1806      | -0.5452      | 0.783        |
| H          | -4.8252      | -1.1068      | -0.4847      | H          | -4.7685      | -0.8643      | -0.8413      |
| H          | -4.4631      | 1.3939       | -0.2165      | H          | -4.3303      | 1.5757       | -0.2744      |
| H          | -3.8346      | 0.6851       | -1.7038      | H          | -3.6188      | 0.9953       | -1.7794      |
| H          | -2.9226      | -2.5661      | 0.0743       | H          | -2.979       | -2.4626      | -0.2884      |
| H          | -2.602       | -1.6468      | -1.3846      | H          | -2.5015      | -1.417       | -1.6139      |
| H          | 0.1538       | 0.9627       | 1.62         | H          | 0.2518       | 2.0682       | 0.6818       |
| H          | 0.125        | 2.1641       | 0.3645       | H          | 0.1346       | 0.7707       | 1.8283       |
| H          | 1.1316       | 0.6005       | -1.2583      | H          | 1.2076       | 0.5607       | -1.031       |
| H          | 1.4002       | -1.4045      | 1.0557       | H          | 1.2481       | -1.5705      | 1.1808       |
| H          | -0.347       | -1.6144      | -1.4337      | H          | -0.2477      | -1.5445      | -1.4749      |
| H          | -0.2613      | -2.7632      | -0.1285      | H          | -0.3241      | -2.7917      | -0.2611      |
| H          | 3.8148       | 2.1899       | 1.4986       | H          | 3.9696       | 1.2054       | 2.1283       |
| H          | 2.0495       | 2.0644       | 1.9856       | H          | 2.2934       | 0.6095       | 2.6153       |
| H          | 3.4388       | 0.6237       | -1.7452      | H          | 3.2591       | 1.9112       | -1.1937      |
| H          | 4.5557       | 1.4424       | -0.6525      | H          | 4.6069       | 1.4359       | -0.1517      |
| H          | 4.7284       | -0.4225      | 0.5571       | H          | 4.009        | -0.7843      | -0.7589      |
| H          | -1.2201      | 3.1311       | -0.7886      | H          | -0.9888      | 3.2107       | -0.4148      |
| H          | -2.779       | 2.9957       | -1.5591      | H          | -2.4724      | 3.2172       | -1.332       |
| H          | -2.6956      | 3.343        | 0.1785       | H          | -2.5391      | 3.3907       | 0.4321       |
| H          | 2.9677       | -1.5785      | -0.5956      | H          | 2.2003       | -1.4814      | -1.4807      |

|            |              |              |              |            |              |              |              |
|------------|--------------|--------------|--------------|------------|--------------|--------------|--------------|
| H          | -1.5973      | -2.3854      | 2.0197       | H          | -1.8188      | -2.5245      | 1.7815       |
| H          | -0.5044      | -1.0494      | 2.3525       | H          | -0.7146      | -1.269       | 2.3279       |
| H          | -2.2436      | -0.7779      | 2.3769       | H          | -2.4371      | -0.9283      | 2.2266       |
| <b>3-1</b> | X<br>axis(Å) | Y<br>axis(Å) | Z<br>axis(Å) | <b>3-2</b> | X<br>axis(Å) | Y<br>axis(Å) | Z<br>axis(Å) |
| C          | 3.6311       | -0.5554      | -0.3088      | C          | 3.1718       | -0.4694      | -1.2252      |
| C          | 3.0041       | 0.8216       | -0.5124      | C          | 2.8989       | 0.8853       | -0.58        |
| C          | 1.5812       | 0.9077       | -0.0232      | C          | 1.5412       | 0.9426       | 0.0663       |
| C          | 0.844        | -0.1763      | 0.3188       | C          | 0.8709       | -0.1609      | 0.4756       |
| C          | 1.3396       | -1.6111      | 0.0932       | C          | 1.4276       | -1.5794      | 0.3003       |
| C          | 2.6579       | -1.647       | -0.7311      | C          | 2.887        | -1.5899      | -0.2351      |
| C          | -0.5552      | -0.0981      | 0.8982       | C          | -0.5539      | -0.1366      | 0.9875       |
| C          | -1.5598      | -0.7406      | -0.0697      | C          | -1.465       | -0.7412      | -0.0968      |
| C          | -1.1771      | -2.2285      | -0.2228      | C          | -1.0104      | -2.1949      | -0.3724      |
| C          | 0.2676       | -2.3949      | -0.7165      | C          | 0.4901       | -2.2951      | -0.7111      |
| C          | -3.0299      | -0.53        | 0.3939       | C          | -2.9692      | -0.6305      | 0.2842       |
| C          | -3.3956      | 0.9575       | 0.5861       | C          | -3.4148      | 0.8212       | 0.5602       |
| O          | -3.0859      | 1.7326       | -0.5638      | O          | -3.0938      | 1.6888       | -0.5182      |
| C          | 1.5893       | -2.3055      | 1.4503       | C          | 1.4533       | -2.3603      | 1.6348       |
| C          | -4.0229      | -1.1555      | -0.5979      | C          | -3.8694      | -1.2231      | -0.8106      |
| C          | 0.9824       | 2.2665       | -0.011       | C          | 0.9082       | 2.2845       | 0.0815       |
| O          | -0.1517      | 2.5626       | -0.3485      | O          | -0.245       | 2.5539       | -0.2074      |
| O          | 1.8515       | 3.1954       | 0.4162       | O          | 1.7846       | 3.2312       | 0.4543       |
| H          | 4.5528       | -0.6278      | -0.8975      | H          | 2.5561       | -0.59        | -2.1245      |
| H          | 3.9181       | -0.686       | 0.7412       | H          | 4.2177       | -0.5168      | -1.5496      |
| H          | 3.0193       | 1.0725       | -1.5807      | H          | 2.9895       | 1.6537       | -1.3574      |
| H          | 3.6392       | 1.5544       | -0.0019      | H          | 3.663        | 1.0999       | 0.1773       |
| H          | 2.444        | -1.5125      | -1.8002      | H          | 3.1141       | -2.5571      | -0.7011      |
| H          | 3.1412       | -2.6279      | -0.641       | H          | 3.5919       | -1.483       | 0.6014       |
| H          | -0.5831      | -0.6145      | 1.8656       | H          | -0.6403      | -0.7014      | 1.9222       |
| H          | -0.828       | 0.9266       | 1.1451       | H          | -0.8609      | 0.8713       | 1.2649       |
| H          | -1.4482      | -0.2681      | -1.0564      | H          | -1.3153      | -0.1782      | -1.0298      |
| H          | -1.3089      | -2.7516      | 0.7319       | H          | -1.5666      | -2.6143      | -1.2178      |
| H          | -1.8321      | -2.7237      | -0.947       | H          | -1.2376      | -2.8254      | 0.4954       |
| H          | 0.5184       | -3.4633      | -0.7355      | H          | 0.7628       | -3.3551      | -0.7922      |
| H          | 0.2871       | -2.0606      | -1.7634      | H          | 0.6326       | -1.8672      | -1.7124      |
| H          | -3.1725      | -1.0305      | 1.3608       | H          | -3.1449      | -1.2078      | 1.2015       |
| H          | -4.4695      | 1.0619       | 0.776        | H          | -4.5001      | 0.8619       | 0.7051       |
| H          | -2.8901      | 1.3932       | 1.4536       | H          | -2.9699      | 1.2175       | 1.4781       |
| H          | -2.1324      | 1.9577       | -0.5324      | H          | -2.1492      | 1.9399       | -0.4376      |
| H          | 0.67         | -2.4386      | 2.029        | H          | 0.4566       | -2.5578      | 2.0392       |
| H          | 2.0175       | -3.3043      | 1.3068       | H          | 1.9364       | -3.3361      | 1.504        |
| H          | 2.2852       | -1.733       | 2.0735       | H          | 2.0146       | -1.8114      | 2.4002       |

|            |         |         |         |            |         |         |         |
|------------|---------|---------|---------|------------|---------|---------|---------|
| H          | -5.0558 | -0.9236 | -0.3157 | H          | -4.9274 | -1.0588 | -0.578  |
| H          | -3.9404 | -2.2462 | -0.6122 | H          | -3.7323 | -2.305  | -0.8976 |
| H          | -3.8592 | -0.7842 | -1.6151 | H          | -3.6636 | -0.7702 | -1.7861 |
| H          | 1.3443  | 4.032   | 0.3727  | H          | 1.265   | 4.0608  | 0.4258  |
| <b>3-3</b> | X       | Y       | Z       | <b>3-4</b> | X       | Y       | Z       |
|            | axis(Å) | axis(Å) | axis(Å) |            | axis(Å) | axis(Å) | axis(Å) |
| C          | 3.6501  | -0.5565 | -0.2827 | C          | 3.5561  | -1.2164 | 0.2204  |
| C          | 3.0367  | 0.827   | -0.4762 | C          | 3.342   | 0.2583  | -0.0987 |
| C          | 1.6037  | 0.9198  | -0.0176 | C          | 1.9129  | 0.7062  | 0.0654  |
| C          | 0.8509  | -0.1593 | 0.3045  | C          | 0.8567  | -0.1394 | 0.1425  |
| C          | 1.3462  | -1.5957 | 0.0843  | C          | 1.0425  | -1.664  | 0.0673  |
| C          | 2.6713  | -1.6342 | -0.7284 | C          | 2.4638  | -2.0578 | -0.4246 |
| C          | -0.5491 | -0.0755 | 0.8791  | C          | -0.5856 | 0.3208  | 0.3104  |
| C          | -1.5561 | -0.743  | -0.0733 | C          | -1.5251 | -0.3044 | -0.7387 |
| C          | -1.1609 | -2.2275 | -0.2249 | C          | -1.4152 | -1.8372 | -0.7058 |
| C          | 0.2807  | -2.3814 | -0.7283 | C          | 0.0291  | -2.2844 | -0.9289 |
| C          | -3.0265 | -0.5538 | 0.4028  | C          | -3.0043 | 0.1609  | -0.6176 |
| C          | -3.4099 | 0.9247  | 0.6233  | C          | -3.6213 | -0.0695 | 0.7698  |
| O          | -3.1298 | 1.7271  | -0.5165 | O          | -5.0191 | 0.1964  | 0.7207  |
| C          | 1.5861  | -2.2865 | 1.4458  | C          | 0.8265  | -2.2647 | 1.4768  |
| C          | -4.0194 | -1.1747 | -0.5922 | C          | -3.1576 | 1.6344  | -1.0262 |
| C          | 1.1107  | 2.3165  | 0.0579  | C          | 1.7503  | 2.1718  | 0.2049  |
| O          | 1.7298  | 3.2656  | 0.5025  | O          | 1.1263  | 2.7619  | 1.0665  |
| O          | -0.0911 | 2.4792  | -0.5291 | O          | 2.4135  | 2.8266  | -0.7626 |
| H          | 4.5771  | -0.6299 | -0.863  | H          | 4.5383  | -1.5323 | -0.1499 |
| H          | 3.926   | -0.7017 | 0.7682  | H          | 3.5682  | -1.3688 | 1.3057  |
| H          | 3.076   | 1.0928  | -1.5404 | H          | 3.6514  | 0.4485  | -1.1345 |
| H          | 3.6605  | 1.5539  | 0.0577  | H          | 4.0028  | 0.85    | 0.5468  |
| H          | 2.4674  | -1.4855 | -1.7978 | H          | 2.5356  | -1.9307 | -1.5136 |
| H          | 3.1448  | -2.6204 | -0.645  | H          | 2.6554  | -3.1204 | -0.2291 |
| H          | -0.5758 | -0.5702 | 1.8578  | H          | -0.9112 | 0.0587  | 1.3234  |
| H          | -0.8237 | 0.9561  | 1.0974  | H          | -0.6718 | 1.4062  | 0.2324  |
| H          | -1.4601 | -0.2779 | -1.065  | H          | -1.171  | 0.0153  | -1.7304 |
| H          | -1.2826 | -2.7494 | 0.7317  | H          | -1.783  | -2.2394 | 0.2434  |
| H          | -1.8161 | -2.7303 | -0.9436 | H          | -2.044  | -2.2708 | -1.493  |
| H          | 0.5386  | -3.4479 | -0.7538 | H          | 0.0753  | -3.3799 | -0.8792 |
| H          | 0.2952  | -2.0404 | -1.7731 | H          | 0.3083  | -2.013  | -1.9564 |
| H          | -3.1563 | -1.0713 | 1.3625  | H          | -3.5957 | -0.4123 | -1.3455 |
| H          | -4.4811 | 1.0129  | 0.8354  | H          | -3.4961 | -1.1049 | 1.0968  |
| H          | -2.8919 | 1.3523  | 1.4873  | H          | -3.1773 | 0.5927  | 1.5199  |
| H          | -2.1606 | 1.7668  | -0.6266 | H          | -5.3648 | 0.0716  | 1.6211  |
| H          | 0.6635  | -2.4151 | 2.0202  | H          | -0.1847 | -2.0891 | 1.8573  |
| H          | 2.0129  | -3.2868 | 1.3081  | H          | 0.9826  | -3.3497 | 1.4687  |

|            |         |         |         |            |         |         |         |
|------------|---------|---------|---------|------------|---------|---------|---------|
| H          | 2.279   | -1.7138 | 2.0722  | H          | 1.5187  | -1.8365 | 2.2101  |
| H          | -5.0528 | -0.959  | -0.2991 | H          | -4.2147 | 1.9094  | -1.1059 |
| H          | -3.9249 | -2.2639 | -0.6252 | H          | -2.6986 | 1.8185  | -2.0032 |
| H          | -3.8672 | -0.785  | -1.6042 | H          | -2.6947 | 2.3082  | -0.2984 |
| H          | -0.2338 | 3.4484  | -0.4676 | H          | 2.2279  | 3.7689  | -0.5713 |
| <b>3-5</b> | X       | Y       | Z       | <b>3-6</b> | X       | Y       | Z       |
|            | axis(Å) | axis(Å) | axis(Å) |            | axis(Å) | axis(Å) | axis(Å) |
| C          | 3.5907  | -0.9467 | -0.181  | C          | 3.375   | -1.4711 | -0.3348 |
| C          | 3.1681  | 0.4942  | -0.4399 | C          | 3.2547  | 0.0334  | -0.5463 |
| C          | 1.7501  | 0.7875  | -0.0225 | C          | 1.9545  | 0.6085  | -0.0462 |
| C          | 0.82    | -0.1675 | 0.2244  | C          | 0.8584  | -0.1359 | 0.2388  |
| C          | 1.1506  | -1.6598 | 0.0921  | C          | 0.8571  | -1.6642 | 0.0671  |
| C          | 2.4998  | -1.9029 | -0.6411 | C          | 2.0839  | -2.1638 | -0.7468 |
| C          | -0.6093 | 0.1344  | 0.6532  | C          | -0.4532 | 0.4438  | 0.7495  |
| C          | -1.6842 | -0.6    | -0.1794 | C          | -1.6651 | -0.0176 | -0.0866 |
| C          | -1.3695 | -2.1054 | -0.243  | C          | -1.718  | -1.5513 | -0.1431 |
| C          | 0.0523  | -2.3701 | -0.7333 | C          | -0.4118 | -2.1213 | -0.6978 |
| C          | -3.1227 | -0.3413 | 0.3779  | C          | -2.9899 | 0.6399  | 0.4071  |
| C          | -3.466  | 1.1532  | 0.5152  | C          | -4.1707 | 0.3872  | -0.546  |
| O          | -3.2992 | 1.8205  | -0.7275 | O          | -3.8622 | 0.802   | -1.8696 |
| C          | 1.2398  | -2.2845 | 1.5043  | C          | 0.8928  | -2.3268 | 1.4649  |
| C          | -4.1949 | -1.0166 | -0.492  | C          | -3.3976 | 0.2366  | 1.8275  |
| C          | 1.4612  | 2.2291  | 0.1639  | C          | 1.9853  | 2.0733  | 0.1755  |
| O          | 0.9254  | 2.7548  | 1.1217  | O          | 1.6063  | 2.677   | 1.1614  |
| O          | 1.8966  | 2.949   | -0.8839 | O          | 2.5232  | 2.7117  | -0.8773 |
| H          | 4.5229  | -1.1573 | -0.7179 | H          | 4.2119  | -1.8583 | -0.9273 |
| H          | 3.8043  | -1.091  | 0.8842  | H          | 3.609   | -1.6864 | 0.714   |
| H          | 3.2692  | 0.7096  | -1.5114 | H          | 3.3446  | 0.2518  | -1.6182 |
| H          | 3.8649  | 1.1572  | 0.0877  | H          | 4.1024  | 0.5196  | -0.0478 |
| H          | 2.3704  | -1.7745 | -1.7247 | H          | 1.9269  | -1.98   | -1.8187 |
| H          | 2.8333  | -2.9381 | -0.4957 | H          | 2.1988  | -3.2496 | -0.6382 |
| H          | -0.7196 | -0.1267 | 1.713   | H          | -0.5686 | 0.1475  | 1.7977  |
| H          | -0.8094 | 1.2043  | 0.5777  | H          | -0.4495 | 1.5368  | 0.7395  |
| H          | -1.6363 | -0.2089 | -1.2058 | H          | -1.4904 | 0.3408  | -1.1117 |
| H          | -1.5246 | -2.5672 | 0.7388  | H          | -1.9132 | -1.9725 | 0.8485  |
| H          | -2.0535 | -2.6078 | -0.9356 | H          | -2.5367 | -1.8816 | -0.7915 |
| H          | 0.2296  | -3.4534 | -0.7397 | H          | -0.4742 | -3.2171 | -0.7009 |
| H          | 0.1098  | -2.0449 | -1.7815 | H          | -0.3365 | -1.8169 | -1.7511 |
| H          | -3.1909 | -0.7813 | 1.3819  | H          | -2.8143 | 1.725   | 0.411   |
| H          | -4.5052 | 1.2818  | 0.8376  | H          | -4.4459 | -0.6714 | -0.5763 |
| H          | -2.834  | 1.6387  | 1.2649  | H          | -5.056  | 0.944   | -0.2193 |
| H          | -3.4779 | 2.7632  | -0.5691 | H          | -3.6345 | 1.7468  | -1.8343 |
| H          | 0.2985  | -2.2081 | 2.0577  | H          | 0.0128  | -2.0818 | 2.0679  |

|            |              |              |              |            |              |              |              |
|------------|--------------|--------------|--------------|------------|--------------|--------------|--------------|
| H          | 1.4931       | -3.3494      | 1.4465       | H          | 0.9295       | -3.4191      | 1.3802       |
| H          | 2.0057       | -1.7949      | 2.1157       | H          | 1.7692       | -2.0101      | 2.041        |
| H          | -5.201       | -0.7443      | -0.1542      | H          | -4.3004      | 0.7776       | 2.133        |
| H          | -4.1301      | -2.107       | -0.432       | H          | -2.6196      | 0.4781       | 2.5567       |
| H          | -4.1003      | -0.7236      | -1.5428      | H          | -3.6174      | -0.833       | 1.8987       |
| H          | 1.6425       | 3.8659       | -0.6537      | H          | 2.489        | 3.6547       | -0.616       |
| <b>3-7</b> | X<br>axis(Å) | Y<br>axis(Å) | Z<br>axis(Å) | <b>3-8</b> | X<br>axis(Å) | Y<br>axis(Å) | Z<br>axis(Å) |
| C          | 3.3776       | -1.4709      | -0.342       | C          | 3.5555       | -1.3215      | -0.1976      |
| C          | 3.2575       | 0.0333       | -0.5564      | C          | 3.3696       | 0.1683       | -0.4592      |
| C          | 1.9595       | 0.6083       | -0.0529      | C          | 2.015        | 0.6856       | -0.0482      |
| C          | 0.8638       | -0.1339      | 0.2378       | C          | 0.9446       | -0.1083      | 0.1981       |
| C          | 0.8605       | -1.6619      | 0.0706       | C          | 1.0321       | -1.6384      | 0.0696       |
| C          | 2.0842       | -2.1643      | -0.7465      | C          | 2.3275       | -2.0926      | -0.6603      |
| C          | -0.4453      | 0.4514       | 0.7493       | C          | -0.4209      | 0.4144       | 0.6218       |
| C          | -1.6607      | -0.0121      | -0.0804      | C          | -1.5576      | -0.1305      | -0.2672      |
| C          | -1.7152      | -1.5461      | -0.1306      | C          | -1.5287      | -1.6659      | -0.2867      |
| C          | -0.4117      | -2.1199      | -0.6881      | C          | -0.1659      | -2.1795      | -0.7528      |
| C          | -2.9834      | 0.6486       | 0.4158       | C          | -2.9369      | 0.4681       | 0.1324       |
| C          | -4.1695      | 0.3916       | -0.5286      | C          | -4.0012      | 0.178        | -0.9398      |
| O          | -3.8542      | 0.8212       | -1.8454      | O          | -5.1949      | 0.9069       | -0.6778      |
| C          | 0.9009       | -2.3202      | 1.4702       | C          | 1.0216       | -2.2634      | 1.4849       |
| C          | -3.3834      | 0.2539       | 1.8409       | C          | -3.4383      | 0.0175       | 1.5108       |
| C          | 1.9893       | 2.0726       | 0.1657       | C          | 1.9576       | 2.155        | 0.1325       |
| O          | 1.649        | 2.6728       | 1.1677       | O          | 1.5022       | 2.7625       | 1.0828       |
| O          | 2.4794       | 2.7123       | -0.9093      | O          | 2.5062       | 2.7931       | -0.915       |
| H          | 4.2118       | -1.8601      | -0.9372      | H          | 4.4437       | -1.6789      | -0.7313      |
| H          | 3.6161       | -1.6839      | 0.7063       | H          | 3.7402       | -1.4965      | 0.8684       |
| H          | 3.3436       | 0.2496       | -1.629       | H          | 3.5083       | 0.3632       | -1.5304      |
| H          | 4.1068       | 0.5208       | -0.062       | H          | 4.1612       | 0.7122       | 0.0708       |
| H          | 1.923        | -1.9839      | -1.8183      | H          | 2.2224       | -1.9454      | -1.7441      |
| H          | 2.1991       | -3.2499      | -0.6349      | H          | 2.4922       | -3.1675      | -0.5142      |
| H          | -0.5576      | 0.16         | 1.7992       | H          | -0.581       | 0.1396       | 1.67         |
| H          | -0.4381      | 1.5447       | 0.7346       | H          | -0.4716      | 1.5056       | 0.5816       |
| H          | -1.4893      | 0.3417       | -1.1075      | H          | -1.3498      | 0.2141       | -1.2915      |
| H          | -1.9071      | -1.9632      | 0.8634       | H          | -1.7566      | -2.0737      | 0.7036       |
| H          | -2.5365      | -1.8783      | -0.7746      | H          | -2.2931      | -2.0533      | -0.9691      |
| H          | -0.4756      | -3.2157      | -0.6871      | H          | -0.1718      | -3.2769      | -0.7303      |
| H          | -0.3399      | -1.8193      | -1.7427      | H          | -0.0463      | -1.8964      | -1.8079      |
| H          | -2.8074      | 1.7336       | 0.4109       | H          | -2.8232      | 1.5598       | 0.1869       |
| H          | -4.4398      | -0.6684      | -0.5598      | H          | -3.6461      | 0.4646       | -1.9351      |
| <b>4-1</b> | X<br>axis(Å) | Y<br>axis(Å) | Z<br>axis(Å) | <b>4-2</b> | X<br>axis(Å) | Y<br>axis(Å) | Z<br>axis(Å) |

|   |         |         |         |   |         |         |         |
|---|---------|---------|---------|---|---------|---------|---------|
| C | -2.8328 | 2.3204  | -0.3816 | C | 3.1734  | -1.9746 | -0.4265 |
| C | -2.97   | 0.8263  | -0.3176 | C | 3.1453  | -0.5095 | -0.0984 |
| C | -1.9228 | -0.0239 | -0.3179 | C | 2.0138  | 0.2202  | -0.0501 |
| C | -0.4874 | 0.4622  | -0.4042 | C | 0.6457  | -0.3733 | -0.3128 |
| C | -0.346  | 1.937   | 0.1035  | C | 0.634   | -1.9205 | -0.0727 |
| C | -1.3985 | 2.7979  | -0.6374 | C | 1.8139  | -2.5335 | -0.8679 |
| C | 0.5763  | -0.4306 | 0.2715  | C | -0.5338 | 0.2855  | 0.4337  |
| C | 2.0064  | 0.0687  | -0.0513 | C | -1.8856 | -0.2777 | -0.0693 |
| C | 2.1857  | 1.5518  | 0.3207  | C | -1.932  | -1.8143 | 0.0226  |
| C | 1.0734  | 2.4405  | -0.245  | C | -0.7039 | -2.4834 | -0.6046 |
| C | 3.1322  | -0.7775 | 0.5482  | C | -3.1207 | 0.3377  | 0.5914  |
| C | 2.9993  | -1.5561 | 1.6378  | C | -3.1334 | 0.8726  | 1.8261  |
| C | 4.4602  | -0.7089 | -0.1695 | C | -4.3835 | 0.321   | -0.237  |
| O | 4.322   | -1.2588 | -1.4704 | O | -4.2159 | 1.1744  | -1.3587 |
| C | -0.5703 | 2.0826  | 1.6325  | C | 0.7858  | -2.3116 | 1.4218  |
| H | -0.2546 | 0.4553  | -1.4811 | H | 0.4666  | -0.2013 | -1.3863 |
| C | -2.1967 | -1.4832 | -0.3657 | C | 2.1802  | 1.668   | 0.2126  |
| O | -1.5888 | -2.2639 | -1.0813 | O | 2.8502  | 2.1308  | 1.1221  |
| O | -3.1802 | -1.8064 | 0.513   | O | 1.5137  | 2.3706  | -0.737  |
| C | -3.4894 | -3.1993 | 0.5442  | C | 1.6355  | 3.7854  | -0.5959 |
| H | -3.4831 | 2.7094  | -1.1737 | H | 3.9067  | -2.1535 | -1.2214 |
| H | -3.2018 | 2.7425  | 0.5607  | H | 3.529   | -2.5201 | 0.4556  |
| H | -3.9896 | 0.4464  | -0.2905 | H | 4.1087  | -0.0403 | 0.0967  |
| H | -1.2042 | 2.7592  | -1.7182 | H | 1.6794  | -2.3229 | -1.9379 |
| H | -1.3113 | 3.8533  | -0.3502 | H | 1.8229  | -3.6264 | -0.7715 |
| H | 0.4974  | -1.4629 | -0.0866 | H | -0.5394 | 1.3689  | 0.2686  |
| H | 0.3963  | -0.4667 | 1.3514  | H | -0.4139 | 0.1433  | 1.5131  |
| H | 2.1009  | -0.0055 | -1.1444 | H | -1.9313 | -0.0154 | -1.1364 |
| H | 3.1438  | 1.924   | -0.0622 | H | -2.0325 | -2.1259 | 1.0692  |
| H | 2.236   | 1.6635  | 1.4104  | H | -2.8246 | -2.1954 | -0.4887 |
| H | 1.1889  | 2.485   | -1.3363 | H | -0.7533 | -2.3445 | -1.6929 |
| H | 1.2132  | 3.4659  | 0.1196  | H | -0.757  | -3.5656 | -0.4313 |
| H | 3.8309  | -2.1417 | 2.0208  | H | -4.039  | 1.2982  | 2.2504  |
| H | 2.0705  | -1.6378 | 2.1914  | H | -2.2563 | 0.8988  | 2.4634  |
| H | 4.8096  | 0.3234  | -0.2601 | H | -4.6107 | -0.6876 | -0.5938 |
| H | 5.2409  | -1.2727 | 0.3524  | H | -5.2538 | 0.6719  | 0.3277  |
| H | 3.8324  | -2.0935 | -1.3696 | H | -3.8786 | 2.0192  | -1.0147 |
| H | -0.5371 | 3.1388  | 1.9248  | H | 0.8511  | -3.4011 | 1.5268  |
| H | -1.5367 | 1.6855  | 1.9567  | H | 1.6834  | -1.8861 | 1.8801  |
| H | 0.1898  | 1.5659  | 2.2241  | H | -0.0581 | -1.9844 | 2.0346  |
| H | -3.8444 | -3.536  | -0.4349 | H | 1.2204  | 4.1127  | 0.3625  |
| H | -2.6169 | -3.779  | 0.8614  | H | 2.682   | 4.092   | -0.6909 |
| H | -4.2899 | -3.3524 | 1.2734  | H | 1.0627  | 4.2565  | -1.3994 |

| <b>4-3</b> | X<br>axis(Å) | Y<br>axis(Å) | Z<br>axis(Å) | <b>4-4</b> | X<br>axis(Å) | Y<br>axis(Å) | Z<br>axis(Å) |
|------------|--------------|--------------|--------------|------------|--------------|--------------|--------------|
| C          | -2.7987      | 2.3179       | 0.1526       | C          | -2.7428      | 2.4212       | -0.2863      |
| C          | -2.8931      | 0.8244       | 0.0284       | C          | -2.9565      | 0.9351       | -0.2579      |
| C          | -1.8446      | 0.0291       | -0.2667      | C          | -1.9558      | 0.0325       | -0.3128      |
| C          | -0.4559      | 0.5839       | -0.5228      | C          | -0.4998      | 0.4449       | -0.4286      |
| C          | -0.2575      | 1.9833       | 0.1535       | C          | -0.2654      | 1.8971       | 0.1102       |
| C          | -1.4399      | 2.8883       | -0.2716      | C          | -1.2937      | 2.8307       | -0.5744      |
| C          | 0.7243       | -0.3469      | -0.1685      | C          | 0.5314       | -0.523       | 0.1913       |
| C          | 2.063        | 0.2603       | -0.6396      | C          | 1.9745       | -0.078       | -0.1389      |
| C          | 2.281        | 1.6866       | -0.1054      | C          | 2.2468       | 1.3851       | 0.2492       |
| C          | 1.0706       | 2.5919       | -0.3567      | C          | 1.1673       | 2.3375       | -0.2727      |
| C          | 3.2649       | -0.6365      | -0.3565      | C          | 3.024        | -1.0129      | 0.4534       |
| C          | 4.0822       | -1.0198      | -1.3552      | C          | 3.0875       | -1.308       | 1.7646       |
| C          | 3.5408       | -1.0668      | 1.0619       | C          | 3.9959       | -1.6158      | -0.5268      |
| O          | 2.6614       | -2.1193      | 1.4242       | O          | 4.802        | -0.5839      | -1.0741      |
| C          | -0.2168      | 1.9116       | 1.7035       | C          | -0.4348      | 2.011        | 1.6488       |
| H          | -0.412       | 0.732        | -1.6138      | H          | -0.2974      | 0.4546       | -1.5116      |
| C          | -2.0911      | -1.4213      | -0.4711      | C          | -2.3072      | -1.4086      | -0.3922      |
| O          | -1.6097      | -2.0665      | -1.3897      | O          | -1.7676      | -2.1964      | -1.1532      |
| O          | -2.8896      | -1.9059      | 0.514        | O          | -3.2736      | -1.7074      | 0.5136       |
| C          | -3.1455      | -3.3059      | 0.4113       | C          | -3.6523      | -3.0834      | 0.5178       |
| H          | -3.5837      | 2.7814       | -0.4562      | H          | -3.0609      | 2.8352       | 0.6778       |
| H          | -3.0078      | 2.5926       | 1.1933       | H          | -3.3952      | 2.8654       | -1.0471      |
| H          | -3.8843      | 0.3989       | 0.174        | H          | -3.9933      | 0.6073       | -0.2103      |
| H          | -1.4345      | 3.0038       | -1.3643      | H          | -1.1343      | 2.8119       | -1.6615      |
| H          | -1.326       | 3.8983       | 0.1418       | H          | -1.1429      | 3.8719       | -0.2628      |
| H          | 0.61         | -1.3212      | -0.6562      | H          | 0.3987       | -1.5349      | -0.2079      |
| H          | 0.731        | -0.5438      | 0.9087       | H          | 0.3708       | -0.6042      | 1.2722       |
| H          | 1.9763       | 0.3588       | -1.7328      | H          | 2.0618       | -0.133       | -1.2342      |
| H          | 3.1589       | 2.1315       | -0.5915      | H          | 3.217        | 1.7003       | -0.1558      |
| H          | 2.5085       | 1.6725       | 0.9658       | H          | 2.3318       | 1.4872       | 1.3374       |
| H          | 0.9971       | 2.7808       | -1.436       | H          | 1.2542       | 2.3942       | -1.3659      |
| H          | 1.2477       | 3.5672       | 0.1138       | H          | 1.3679       | 3.3484       | 0.1038       |
| H          | 4.9477       | -1.651       | -1.1748      | H          | 3.8392       | -1.9846      | 2.1609       |
| H          | 3.9091       | -0.7154      | -2.3836      | H          | 2.3933       | -0.8801      | 2.4813       |
| H          | 4.5664       | -1.4334      | 1.1794       | H          | 4.6567       | -2.3519      | -0.057       |
| H          | 3.4129       | -0.2422      | 1.768        | H          | 3.4644       | -2.1189      | -1.3408      |
| H          | 2.6078       | -2.7163      | 0.6578       | H          | 5.1544       | -0.0812      | -0.3201      |
| H          | -0.1476      | 2.9189       | 2.1309       | H          | -0.3265      | 3.0539       | 1.9691       |
| H          | -1.1076      | 1.4388       | 2.1274       | H          | -1.4144      | 1.6654       | 1.992        |
| H          | 0.6402       | 1.3471       | 2.0801       | H          | 0.3076       | 1.4296       | 2.2016       |
| H          | -3.6687      | -3.5329      | -0.523       | H          | -4.0604      | -3.3725      | -0.4558      |

|            |         |         |         |            |         |         |         |
|------------|---------|---------|---------|------------|---------|---------|---------|
| H          | -2.212  | -3.8732 | 0.4812  | H          | -2.7993 | -3.7153 | 0.7846  |
| H          | -3.789  | -3.5952 | 1.2468  | H          | -4.4317 | -3.218  | 1.273   |
| <b>4-5</b> | X       | Y       | Z       | <b>4-6</b> | X       | Y       | Z       |
|            | axis(Å) | axis(Å) | axis(Å) |            | axis(Å) | axis(Å) | axis(Å) |
| C          | 3.3342  | -1.6803 | -0.3604 | C          | 3.0164  | -2.1923 | -0.3565 |
| C          | 3.1267  | -0.2398 | 0.0092  | C          | 3.1147  | -0.7237 | -0.0594 |
| C          | 1.9207  | 0.3605  | 0.0134  | C          | 2.0534  | 0.1061  | -0.0491 |
| C          | 0.6423  | -0.3677 | -0.3448 | C          | 0.642   | -0.3673 | -0.3266 |
| C          | 0.7881  | -1.9156 | -0.1563 | C          | 0.4854  | -1.9022 | -0.0576 |
| C          | 2.0713  | -2.3664 | -0.8983 | C          | 1.6206  | -2.6361 | -0.8147 |
| C          | -0.6395 | 0.1347  | 0.3521  | C          | -0.4853 | 0.4136  | 0.3815  |
| C          | -1.8881 | -0.5694 | -0.2235 | C          | -1.8717 | -0.0512 | -0.1197 |
| C          | -1.7719 | -2.1041 | -0.1989 | C          | -2.0611 | -1.5744 | -0.0108 |
| C          | -0.4473 | -2.6006 | -0.7873 | C          | -0.8869 | -2.3556 | -0.6093 |
| C          | -3.1714 | -0.0895 | 0.4453  | C          | -3.0173 | 0.6996  | 0.5511  |
| C          | -3.4189 | -0.2572 | 1.7571  | C          | -3.1737 | 0.757   | 1.8861  |
| C          | -4.172  | 0.5847  | -0.4553 | C          | -3.9765 | 1.4017  | -0.374  |
| O          | -3.6171 | 1.7999  | -0.9345 | O          | -4.6581 | 0.4347  | -1.1573 |
| C          | 0.898   | -2.3425 | 1.3319  | C          | 0.5714  | -2.2712 | 1.4476  |
| H          | 0.5023  | -0.1764 | -1.4208 | H          | 0.4982  | -0.2033 | -1.4067 |
| C          | 1.9115  | 1.8082  | 0.3255  | C          | 2.3462  | 1.5385  | 0.1872  |
| O          | 2.4731  | 2.3097  | 1.2864  | O          | 3.0441  | 1.9581  | 1.0967  |
| O          | 1.2275  | 2.4653  | -0.6435 | O          | 1.7585  | 2.2779  | -0.786  |
| C          | 1.1812  | 3.8794  | -0.4578 | C          | 2.0033  | 3.6791  | -0.6694 |
| H          | 4.1258  | -1.7497 | -1.1155 | H          | 3.7454  | -2.4543 | -1.132  |
| H          | 3.6983  | -2.2159 | 0.5243  | H          | 3.3044  | -2.7478 | 0.5439  |
| H          | 4.0204  | 0.3244  | 0.2728  | H          | 4.1129  | -0.339  | 0.1454  |
| H          | 1.9739  | -2.1321 | -1.9674 | H          | 1.5263  | -2.4382 | -1.8914 |
| H          | 2.1957  | -3.4547 | -0.8352 | H          | 1.5291  | -3.723  | -0.6957 |
| H          | -0.7628 | 1.2134  | 0.2006  | H          | -0.399  | 1.4871  | 0.1774  |
| H          | -0.5638 | -0.0062 | 1.4365  | H          | -0.3925 | 0.3089  | 1.4684  |
| H          | -1.9383 | -0.285  | -1.285  | H          | -1.8993 | 0.1921  | -1.1923 |
| H          | -2.5986 | -2.5427 | -0.7727 | H          | -2.9801 | -1.8704 | -0.5327 |
| H          | -1.8829 | -2.4874 | 0.8219  | H          | -2.2045 | -1.8718 | 1.0345  |
| H          | -0.4572 | -2.4156 | -1.8697 | H          | -0.9049 | -2.2271 | -1.6998 |
| H          | -0.3843 | -3.6889 | -0.6626 | H          | -1.0365 | -3.4267 | -0.4242 |
| H          | -4.3425 | 0.0883  | 2.2128  | H          | -3.9936 | 1.305   | 2.3417  |
| H          | -2.7065 | -0.7467 | 2.4146  | H          | -2.4908 | 0.2544  | 2.5645  |
| H          | -4.4155 | -0.054  | -1.3103 | H          | -4.7238 | 1.9892  | 0.1696  |
| H          | -5.1077 | 0.8178  | 0.0635  | H          | -3.4404 | 2.0831  | -1.0423 |
| H          | -3.2855 | 2.2778  | -0.1551 | H          | -5.0212 | -0.2178 | -0.5344 |
| H          | 1.0647  | -3.4235 | 1.408   | H          | 0.5254  | -3.3589 | 1.5776  |
| H          | 1.7234  | -1.8484 | 1.8526  | H          | 1.499   | -1.9267 | 1.914   |



|            |         |         |         |            |         |         |         |
|------------|---------|---------|---------|------------|---------|---------|---------|
| H          | -0.0051 | -2.119  | 1.9057  | H          | -0.2455 | -1.846  | 2.0364  |
| H          | 0.6778  | 4.1267  | 0.4821  | H          | 1.6069  | 4.0605  | 0.2769  |
| H          | 2.1903  | 4.3027  | -0.4809 | H          | 3.0738  | 3.8901  | -0.7553 |
| H          | 0.606   | 4.3107  | -1.2817 | H          | 1.4844  | 4.183   | -1.4895 |
| <b>4-7</b> | X       | Y       | Z       | <b>4-8</b> | X       | Y       | Z       |
|            | axis(Å) | axis(Å) | axis(Å) |            | axis(Å) | axis(Å) | axis(Å) |
| C          | 3.2764  | -1.7939 | -0.4479 | C          | -2.6381 | 2.5024  | 0.0302  |
| C          | 3.1472  | -0.3479 | -0.0637 | C          | -2.9021 | 1.0241  | 0.0493  |
| C          | 1.97    | 0.3051  | -0.0093 | C          | -1.9609 | 0.091   | -0.2008 |
| C          | 0.6485  | -0.3644 | -0.3233 | C          | -0.5304 | 0.4589  | -0.5491 |
| C          | 0.7323  | -1.9168 | -0.1407 | C          | -0.1516 | 1.8808  | -0.0122 |
| C          | 1.9634  | -2.4231 | -0.9335 | C          | -1.242  | 2.8738  | -0.484  |
| C          | -0.5894 | 0.1965  | 0.4092  | C          | 0.5538  | -0.5672 | -0.1508 |
| C          | -1.8871 | -0.4468 | -0.1289 | C          | 1.9339  | -0.1551 | -0.71   |
| C          | -1.831  | -1.9869 | -0.0779 | C          | 2.3249  | 1.2772  | -0.3108 |
| C          | -0.5569 | -2.5445 | -0.722  | C          | 1.214   | 2.2867  | -0.6171 |
| C          | -3.1106 | 0.1692  | 0.5486  | C          | 3.0072  | -1.1876 | -0.3769 |
| C          | -3.7058 | -0.3387 | 1.643   | C          | 3.5128  | -1.983  | -1.3381 |
| C          | -3.6355 | 1.436   | -0.083  | C          | 3.4648  | -1.3327 | 1.0517  |
| O          | -4.1809 | 1.128   | -1.3566 | O          | 4.4069  | -0.3159 | 1.3546  |
| C          | 0.8836  | -2.3495 | 1.3423  | C          | -0.0582 | 1.9414  | 1.536   |
| H          | 0.4835  | -0.1662 | -1.3947 | H          | -0.5156 | 0.5049  | -1.65   |
| C          | 2.0384  | 1.7491  | 0.3118  | C          | -2.3771 | -1.3333 | -0.2637 |
| O          | 2.6584  | 2.217   | 1.2535  | O          | -2.007  | -2.1089 | -1.1312 |
| O          | 1.3496  | 2.4447  | -0.6267 | O          | -3.1856 | -1.6337 | 0.7848  |
| C          | 1.3745  | 3.8578  | -0.4288 | C          | -3.6113 | -2.9955 | 0.8118  |
| H          | 4.0315  | -1.8928 | -1.2363 | H          | -3.39   | 2.9955  | -0.5968 |
| H          | 3.6546  | -2.3496 | 0.4183  | H          | -2.7751 | 2.8917  | 1.046   |
| H          | 4.0745  | 0.1741  | 0.1684  | H          | -3.9282 | 0.7298  | 0.2619  |
| H          | 1.8334  | -2.1837 | -1.998  | H          | -1.2669 | 2.8912  | -1.5824 |
| H          | 2.0421  | -3.5159 | -0.8747 | H          | -1.0004 | 3.8967  | -0.1689 |
| H          | -0.656  | 1.2801  | 0.263   | H          | 0.3124  | -1.5565 | -0.5555 |
| H          | -0.5016 | 0.0478  | 1.4922  | H          | 0.5818  | -0.6874 | 0.9378  |
| H          | -1.9517 | -0.1956 | -1.1978 | H          | 1.8226  | -0.1375 | -1.8052 |
| H          | -1.8943 | -2.3532 | 0.9515  | H          | 3.2338  | 1.575   | -0.8489 |
| H          | -2.7024 | -2.4015 | -0.6008 | H          | 2.5711  | 1.3331  | 0.7543  |
| H          | -0.6027 | -2.3592 | -1.8034 | H          | 1.1205  | 2.3817  | -1.7071 |
| H          | -0.5386 | -3.6345 | -0.5974 | H          | 1.5148  | 3.275   | -0.2473 |
| H          | -4.572  | 0.1406  | 2.0915  | H          | 4.2652  | -2.7356 | -1.1199 |
| H          | -3.3482 | -1.2332 | 2.1411  | H          | 3.1838  | -1.9103 | -2.3709 |
| H          | -4.4215 | 1.9045  | 0.5187  | H          | 2.6308  | -1.2615 | 1.7548  |
| H          | -2.8367 | 2.1725  | -0.2114 | H          | 3.9486  | -2.3003 | 1.2242  |
| H          | -4.7801 | 0.3734  | -1.2251 | H          | 5.0239  | -0.277  | 0.604   |

|            |              |              |              |            |              |              |              |
|------------|--------------|--------------|--------------|------------|--------------|--------------|--------------|
| H          | 0.9925       | -3.4382      | 1.4132       | H          | 0.1523       | 2.9654       | 1.8664       |
| H          | 1.7579       | -1.9035      | 1.8253       | H          | -0.9831      | 1.6251       | 2.0273       |
| H          | 0.0217       | -2.0747      | 1.9556       | H          | 0.7353       | 1.3068       | 1.939        |
| H          | 0.9186       | 4.1188       | 0.5314       | H          | -4.1911      | -3.2346      | -0.0853      |
| H          | 2.4002       | 4.2354       | -0.4872      | H          | -2.7505      | -3.6648      | 0.9076       |
| H          | 0.7888       | 4.322        | -1.227       | H          | -4.2544      | -3.1323      | 1.6856       |
| <b>5-1</b> | X<br>axis(Å) | Y<br>axis(Å) | Z<br>axis(Å) | <b>5-2</b> | X<br>axis(Å) | Y<br>axis(Å) | Z<br>axis(Å) |
| C          | 3.7578       | 0.1774       | -0.2218      | C          | 3.7389       | -0.3445      | -0.1466      |
| C          | 2.949        | 1.4674       | -0.3158      | C          | 3.15         | 1.0583       | -0.2113      |
| C          | 1.5209       | 1.3324       | 0.1618       | C          | 1.7041       | 1.1508       | 0.2361       |
| C          | 0.9482       | 0.125        | 0.3897       | C          | 0.9078       | 0.0575       | 0.3594       |
| C          | 1.6311       | -1.2063      | 0.055        | C          | 1.4065       | -1.3602      | 0.038        |
| C          | 2.9438       | -0.9953      | -0.7494      | C          | 2.7596       | -1.3512      | -0.7241      |
| C          | -0.455       | -0.0224      | 0.9455       | C          | -0.5451      | 0.1249       | 0.8107       |
| C          | -1.357       | -0.7259      | -0.0805      | C          | -1.5234      | -0.59        | -0.1455      |
| C          | -0.775       | -2.1321      | -0.3368      | C          | -1.0545      | -2.0373      | -0.3772      |
| C          | 0.6782       | -2.0605      | -0.8274      | C          | 0.3886       | -2.0885      | -0.8736      |
| C          | -2.8447      | -0.7502      | 0.3745       | C          | -2.9946      | -0.54        | 0.3804       |
| C          | -3.408       | 0.6566       | 0.6688       | C          | -3.4826      | 0.8855       | 0.6988       |
| O          | -3.1825      | 1.5519       | -0.4121      | O          | -3.2847      | 1.742        | -0.4168      |
| C          | 1.9668       | -1.9669      | 1.357        | C          | 1.5871       | -2.1438      | 1.3588       |
| C          | -3.7386      | -1.4269      | -0.6763      | C          | -3.9702      | -1.1811      | -0.62        |
| C          | 0.8006       | 2.6508       | 0.3316       | C          | 1.2788       | 2.5715       | 0.522        |
| O          | -0.3925      | 2.655        | -0.4509      | O          | 0.9213       | 3.1961       | -0.7005      |
| H          | 4.6822       | 0.2823       | -0.8013      | H          | 3.9866       | -0.6007      | 0.8899       |
| H          | 4.0577       | -0.0031      | 0.8171       | H          | 4.6799       | -0.3731      | -0.708       |
| H          | 2.9339       | 1.8126       | -1.3573      | H          | 3.2159       | 1.4344       | -1.2402      |
| H          | 3.4652       | 2.2368       | 0.2713       | H          | 3.7783       | 1.7112       | 0.4068       |
| H          | 2.7172       | -0.8003      | -1.8066      | H          | 2.5987       | -1.0996      | -1.7815      |
| H          | 3.555        | -1.9063      | -0.7342      | H          | 3.2113       | -2.3511      | -0.7153      |
| H          | -0.4253      | -0.5961      | 1.8798       | H          | -0.6231      | -0.3103      | 1.8147       |
| H          | -0.8638      | 0.9449       | 1.237        | H          | -0.8662      | 1.1619       | 0.9069       |
| H          | -1.3063      | -0.1721      | -1.0292      | H          | -1.4868      | -0.0701      | -1.1137      |
| H          | -0.8341      | -2.737       | 0.5758       | H          | -1.1611      | -2.6229      | 0.5431       |
| H          | -1.3555      | -2.6576      | -1.102       | H          | -1.6785      | -2.5258      | -1.1332      |
| H          | 1.0724       | -3.0798      | -0.9283      | H          | 0.6834       | -3.1382      | -1.001       |
| H          | 0.6525       | -1.6435      | -1.8441      | H          | 0.4086       | -1.6424      | -1.8779      |
| H          | -2.9245      | -1.3364      | 1.2995       | H          | -3.0542      | -1.1186      | 1.3119       |
| H          | -4.4894      | 0.6055       | 0.8369       | H          | -4.5493      | 0.8828       | 0.9492       |
| H          | -2.978       | 1.0848       | 1.5798       | H          | -2.9503      | 1.3021       | 1.5595       |
| H          | -2.2829      | 1.9278       | -0.3086      | H          | -3.6412      | 2.6145       | -0.1756      |
| H          | 1.0714       | -2.2605      | 1.9136       | H          | 0.6481       | -2.2594      | 1.9092       |

|            |         |         |         |            |         |         |         |
|------------|---------|---------|---------|------------|---------|---------|---------|
| H          | 2.5202  | -2.8882 | 1.1413  | H          | 1.9728  | -3.1518 | 1.1673  |
| H          | 2.5824  | -1.3607 | 2.0308  | H          | 2.2903  | -1.6431 | 2.0334  |
| H          | -4.7949 | -1.3581 | -0.3937 | H          | -5.0075 | -1.0539 | -0.2908 |
| H          | -3.5093 | -2.4924 | -0.7702 | H          | -3.8017 | -2.2581 | -0.7098 |
| H          | -3.6213 | -0.9611 | -1.6604 | H          | -3.8742 | -0.7332 | -1.6146 |
| H          | 0.5448  | 2.8283  | 1.3809  | H          | 0.4428  | 2.6526  | 1.2196  |
| H          | 1.4144  | 3.4921  | -0.0062 | H          | 2.0969  | 3.1423  | 0.9741  |
| H          | -0.1327 | 2.3401  | -1.3358 | H          | 0.2929  | 2.5952  | -1.1393 |
| <b>5-3</b> | X       | Y       | Z       | <b>5-4</b> | X       | Y       | Z       |
|            | axis(Å) | axis(Å) | axis(Å) |            | axis(Å) | axis(Å) | axis(Å) |
| C          | 3.6187  | -0.9022 | -0.3709 | C          | 3.6812  | -0.9864 | -0.27   |
| C          | 3.3557  | 0.5919  | -0.2416 | C          | 3.4045  | 0.4482  | -0.7002 |
| C          | 1.9897  | 0.944   | 0.3179  | C          | 2.0232  | 0.9586  | -0.3371 |
| C          | 0.9787  | 0.0406  | 0.3905  | C          | 1.0274  | 0.1337  | 0.0747  |
| C          | 1.1328  | -1.4072 | -0.1132 | C          | 1.1988  | -1.3952 | 0.1382  |
| C          | 2.4106  | -1.5962 | -0.9749 | C          | 2.4863  | -1.8689 | -0.5894 |
| C          | -0.3975 | 0.3542  | 0.963   | C          | -0.3431 | 0.6186  | 0.5252  |
| C          | -1.5372 | -0.0098 | -0.0095 | C          | -1.4782 | -0.0608 | -0.2634 |
| C          | -1.4387 | -1.4907 | -0.4023 | C          | -1.3731 | -1.5875 | -0.1171 |
| C          | -0.0708 | -1.8008 | -1.0102 | C          | 0.0014  | -2.0902 | -0.5644 |
| C          | -2.9313 | 0.399   | 0.5574  | C          | -2.8716 | 0.5135  | 0.1197  |
| C          | -4.0524 | 0.2907  | -0.4893 | C          | -3.9578 | 0.0412  | -0.8604 |
| O          | -3.7345 | 1.0748  | -1.6307 | O          | -5.1558 | 0.7764  | -0.6403 |
| C          | 1.2124  | -2.3591 | 1.1036  | C          | 1.2752  | -1.8449 | 1.6162  |
| C          | -3.3433 | -0.3686 | 1.8171  | C          | -3.2951 | 0.215   | 1.5642  |
| C          | 1.9138  | 2.3818  | 0.7742  | C          | 1.9059  | 2.4553  | -0.4962 |
| O          | 1.8301  | 3.2188  | -0.3693 | O          | 2.5094  | 3.0858  | 0.6228  |
| H          | 4.4992  | -1.0657 | -1.0032 | H          | 4.5715  | -1.3592 | -0.7895 |
| H          | 3.8568  | -1.3284 | 0.6103  | H          | 3.9091  | -1.02   | 0.8015  |
| H          | 3.4552  | 1.0635  | -1.2276 | H          | 3.5221  | 0.5266  | -1.7887 |
| H          | 4.1427  | 1.0157  | 0.3941  | H          | 4.1716  | 1.0905  | -0.2507 |
| H          | 2.2528  | -1.1882 | -1.9829 | H          | 2.3347  | -1.857  | -1.6775 |
| H          | 2.6281  | -2.6632 | -1.1094 | H          | 2.7154  | -2.9091 | -0.3259 |
| H          | -0.5038 | -0.1934 | 1.906   | H          | -0.4408 | 0.4094  | 1.5964  |
| H          | -0.5074 | 1.4102  | 1.2176  | H          | -0.4521 | 1.7017  | 0.4362  |
| H          | -1.3713 | 0.5835  | -0.9204 | H          | -1.3188 | 0.1804  | -1.3252 |
| H          | -1.6118 | -2.1377 | 0.464   | H          | -1.5544 | -1.8929 | 0.9188  |
| H          | -2.2067 | -1.7424 | -1.1414 | H          | -2.1355 | -2.0827 | -0.7284 |
| H          | -0.0235 | -2.8702 | -1.2536 | H          | 0.0525  | -3.1754 | -0.4071 |
| H          | -0.0055 | -1.267  | -1.9686 | H          | 0.0725  | -1.9355 | -1.6501 |
| H          | -2.8562 | 1.4618  | 0.8278  | H          | -2.8161 | 1.608   | 0.0346  |
| H          | -4.2123 | -0.7443 | -0.8067 | H          | -3.6453 | 0.2115  | -1.8958 |
| H          | -4.9942 | 0.6676  | -0.0755 | H          | -4.1827 | -1.0219 | -0.73   |

|            |         |         |         |            |         |         |         |
|------------|---------|---------|---------|------------|---------|---------|---------|
| H          | -4.4749 | 0.9847  | -2.2549 | H          | -5.8112 | 0.4535  | -1.2821 |
| H          | 0.2992  | -2.346  | 1.7067  | H          | 0.3519  | -1.6397 | 2.1667  |
| H          | 1.3681  | -3.3953 | 0.7815  | H          | 1.4554  | -2.9237 | 1.6887  |
| H          | 2.038   | -2.093  | 1.7727  | H          | 2.0843  | -1.3369 | 2.1523  |
| H          | -4.2942 | 0.0154  | 2.2033  | H          | -4.2356 | 0.7223  | 1.8056  |
| H          | -2.6064 | -0.2598 | 2.6174  | H          | -2.5514 | 0.5678  | 2.2839  |
| H          | -3.4794 | -1.4357 | 1.6161  | H          | -3.4504 | -0.856  | 1.7272  |
| H          | 1.0702  | 2.605   | 1.4282  | H          | 2.4263  | 2.7865  | -1.4016 |
| H          | 2.8118  | 2.6563  | 1.3382  | H          | 0.8796  | 2.8141  | -0.5902 |
| H          | 1.1186  | 2.8523  | -0.923  | H          | 2.173   | 2.6268  | 1.4114  |
| <b>5-5</b> | X       | Y       | Z       | <b>5-6</b> | X       | Y       | Z       |
|            | axis(Å) | axis(Å) | axis(Å) |            | axis(Å) | axis(Å) | axis(Å) |
| C          | 3.5254  | -1.1044 | -0.3933 | C          | 3.7423  | -0.8765 | -0.1987 |
| C          | 3.2871  | 0.349   | -0.7815 | C          | 3.4612  | 0.6198  | -0.1856 |
| C          | 1.9516  | 0.9088  | -0.3315 | C          | 2.061   | 0.9945  | 0.2655  |
| C          | 0.9465  | 0.1182  | 0.1223  | C          | 1.0535  | 0.087   | 0.339   |
| C          | 1.0542  | -1.4171 | 0.1474  | C          | 1.2496  | -1.3907 | -0.0518 |
| C          | 2.2775  | -1.9295 | -0.6604 | C          | 2.5768  | -1.6227 | -0.8236 |
| C          | -0.3752 | 0.6511  | 0.657   | C          | -0.3556 | 0.4208  | 0.8112  |
| C          | -1.583  | 0.0371  | -0.0764 | C          | -1.4347 | -0.0271 | -0.1947 |
| C          | -1.5343 | -1.4954 | 0.0345  | C          | -1.2994 | -1.5298 | -0.4782 |
| C          | -0.2095 | -2.0455 | -0.4993 | C          | 0.1035  | -1.8616 | -0.9861 |
| C          | -2.9286 | 0.6605  | 0.4054  | C          | -2.8596 | 0.4011  | 0.259   |
| C          | -4.1238 | 0.2421  | -0.4667 | C          | -3.884  | 0.2171  | -0.8726 |
| O          | -3.8817 | 0.5786  | -1.8254 | O          | -5.1083 | 0.8498  | -0.5193 |
| C          | 1.193   | -1.9009 | 1.61    | C          | 1.2672  | -2.2545 | 1.2316  |
| C          | -3.2567 | 0.3809  | 1.8752  | C          | -3.347  | -0.3016 | 1.5334  |
| C          | 1.8865  | 2.4115  | -0.461  | C          | 1.9522  | 2.4584  | 0.623   |
| O          | 2.5663  | 2.9976  | 0.6388  | O          | 1.9736  | 3.2228  | -0.5734 |
| H          | 4.3685  | -1.5036 | -0.969  | H          | 4.6594  | -1.0719 | -0.7664 |
| H          | 3.811   | -1.1694 | 0.6628  | H          | 3.9258  | -1.2336 | 0.8211  |
| H          | 3.3471  | 0.4444  | -1.8733 | H          | 3.6175  | 1.0254  | -1.1933 |
| H          | 4.1047  | 0.9496  | -0.3646 | H          | 4.2052  | 1.0938  | 0.4664  |
| H          | 2.0661  | -1.889  | -1.7378 | H          | 2.475   | -1.2849 | -1.8642 |
| H          | 2.4761  | -2.9835 | -0.4291 | H          | 2.8095  | -2.6939 | -0.8729 |
| H          | -0.4209 | 0.4237  | 1.728   | H          | -0.5095 | -0.06   | 1.7835  |
| H          | -0.4417 | 1.7395  | 0.5947  | H          | -0.4905 | 1.4905  | 0.9832  |
| H          | -1.4694 | 0.2937  | -1.1397 | H          | -1.231  | 0.5052  | -1.1361 |
| H          | -2.3487 | -1.9459 | -0.5431 | H          | -1.5146 | -2.1182 | 0.4198  |
| H          | -1.6712 | -1.8155 | 1.0727  | H          | -2.023  | -1.8418 | -1.2391 |
| H          | -0.1967 | -3.135  | -0.3662 | H          | 0.1754  | -2.9443 | -1.1519 |
| H          | -0.1925 | -1.8704 | -1.5841 | H          | 0.2181  | -1.3935 | -1.9738 |
| H          | -2.8226 | 1.7488  | 0.2923  | H          | -2.8276 | 1.4748  | 0.4917  |

|            |         |         |         |            |         |         |         |
|------------|---------|---------|---------|------------|---------|---------|---------|
| H          | -4.318  | -0.8328 | -0.3992 | H          | -3.5241 | 0.6769  | -1.7988 |
| H          | -5.0288 | 0.7703  | -0.1468 | H          | -4.0901 | -0.8411 | -1.061  |
| H          | -4.6646 | 0.3036  | -2.3324 | H          | -5.7239 | 0.7151  | -1.26   |
| H          | 0.3117  | -1.6682 | 2.2156  | H          | 0.3204  | -2.2117 | 1.7791  |
| H          | 1.3296  | -2.9877 | 1.652   | H          | 1.4512  | -3.3084 | 0.9926  |
| H          | 2.0522  | -1.4394 | 2.109   | H          | 2.0498  | -1.9313 | 1.9268  |
| H          | -4.1764 | 0.9009  | 2.166   | H          | -4.3106 | 0.1066  | 1.8572  |
| H          | -2.4658 | 0.7355  | 2.5416  | H          | -2.6491 | -0.1622 | 2.3634  |
| H          | -3.4119 | -0.6863 | 2.0609  | H          | -3.4835 | -1.376  | 1.3759  |
| H          | 2.3766  | 2.739   | -1.3845 | H          | 1.055   | 2.7229  | 1.1833  |
| H          | 0.8717  | 2.811   | -0.5003 | H          | 2.7988  | 2.7673  | 1.2455  |
| H          | 2.2568  | 2.5288  | 1.4326  | H          | 1.3223  | 2.8153  | -1.1695 |
| <b>5-7</b> | X       | Y       | Z       | <b>5-8</b> | X       | Y       | Z       |
|            | axis(Å) | axis(Å) | axis(Å) |            | axis(Å) | axis(Å) | axis(Å) |
| C          | 3.6923  | -0.8095 | 0.1324  | C          | -3.6926 | -0.8724 | -0.2518 |
| C          | 3.3777  | 0.6034  | -0.341  | C          | -3.3937 | 0.6185  | -0.1767 |
| C          | 1.9191  | 0.9996  | -0.2135 | C          | -1.9307 | 0.9789  | -0.3622 |
| C          | 0.9372  | 0.095   | 0.0304  | C          | -0.9377 | 0.0561  | -0.2791 |
| C          | 1.217   | -1.4166 | 0.1231  | C          | -1.2207 | -1.4266 | 0.0331  |
| C          | 2.6407  | -1.7795 | -0.3795 | C          | -2.6668 | -1.6529 | 0.5507  |
| C          | -0.5235 | 0.4681  | 0.2438  | C          | 0.5377  | 0.3794  | -0.4811 |
| C          | -1.453  | -0.2904 | -0.7197 | C          | 1.4132  | -0.1144 | 0.6859  |
| C          | -1.2514 | -1.8066 | -0.5518 | C          | 1.2076  | -1.6224 | 0.8972  |
| C          | 0.2119  | -2.1953 | -0.7681 | C          | -0.2661 | -1.9397 | 1.1439  |
| C          | -2.9521 | 0.1021  | -0.5917 | C          | 2.9209  | 0.2381  | 0.5383  |
| C          | -3.5231 | -0.0578 | 0.8252  | C          | 3.5606  | -0.2762 | -0.76   |
| O          | -4.9296 | 0.1588  | 0.8012  | O          | 4.9665  | -0.0576 | -0.7192 |
| C          | 1.0828  | -1.8759 | 1.5941  | C          | -1.0212 | -2.2595 | -1.2553 |
| C          | -3.1961 | 1.53    | -1.1049 | C          | 3.1543  | 1.7502  | 0.6828  |
| C          | 1.7119  | 2.4839  | -0.3981 | C          | -1.7417 | 2.4495  | -0.6535 |
| O          | 2.0593  | 3.1511  | 0.8053  | O          | -1.9525 | 3.1832  | 0.5435  |
| H          | 4.6832  | -1.1054 | -0.2312 | H          | -4.6986 | -1.0644 | 0.1391  |
| H          | 3.7413  | -0.8371 | 1.2269  | H          | -3.6969 | -1.2029 | -1.2967 |
| H          | 3.6676  | 0.7027  | -1.395  | H          | -3.7215 | 1.0039  | 0.7973  |
| H          | 4.006   | 1.2993  | 0.2283  | H          | -4.0035 | 1.1201  | -0.9381 |
| H          | 2.6712  | -1.7672 | -1.4777 | H          | -2.7474 | -1.3409 | 1.6012  |
| H          | 2.9048  | -2.8014 | -0.0796 | H          | -2.9187 | -2.7207 | 0.5304  |
| H          | -0.785  | 0.238   | 1.2833  | H          | 0.8607  | -0.0797 | -1.4225 |
| H          | -0.6905 | 1.5408  | 0.1409  | H          | 0.7039  | 1.4501  | -0.5991 |
| H          | -1.1445 | -0.0406 | -1.7459 | H          | 1.0579  | 0.3852  | 1.5997  |
| H          | -1.5737 | -2.1392 | 0.44    | H          | 1.5673  | -2.1951 | 0.0366  |
| H          | -1.8714 | -2.3455 | -1.2786 | H          | 1.7913  | -1.9589 | 1.7626  |
| H          | 0.3224  | -3.275  | -0.604  | H          | -0.3816 | -3.0243 | 1.2673  |

|   |         |         |         |   |         |         |         |
|---|---------|---------|---------|---|---------|---------|---------|
| H | 0.448   | -2.0216 | -1.8272 | H | -0.5465 | -1.4913 | 2.1072  |
| H | -3.5274 | -0.5557 | -1.2584 | H | 3.4555  | -0.2263 | 1.3789  |
| H | -3.3529 | -1.0654 | 1.2132  | H | 3.3991  | -1.3497 | -0.8871 |
| H | -3.0818 | 0.6655  | 1.5181  | H | 3.1632  | 0.2459  | -1.636  |
| H | -5.2525 | 0.0484  | 1.7119  | H | 5.3336  | -0.3956 | -1.5539 |
| H | 0.0685  | -1.7472 | 1.9843  | H | 0.0074  | -2.2176 | -1.627  |
| H | 1.3309  | -2.9386 | 1.697   | H | -1.2555 | -3.3159 | -1.0796 |
| H | 1.7511  | -1.3141 | 2.2559  | H | -1.6658 | -1.9084 | -2.0686 |
| H | -4.2685 | 1.7391  | -1.1822 | H | 4.2234  | 1.9742  | 0.7624  |
| H | -2.7655 | 1.6654  | -2.1026 | H | 2.6729  | 2.1351  | 1.588   |
| H | -2.7601 | 2.2813  | -0.4392 | H | 2.7635  | 2.3057  | -0.1754 |
| H | 2.3527  | 2.864   | -1.2013 | H | -0.7594 | 2.7107  | -1.0482 |
| H | 0.6918  | 2.7598  | -0.671  | H | -2.4664 | 2.7913  | -1.4003 |
| H | 1.6526  | 2.645   | 1.529   | H | -1.4286 | 2.7403  | 1.2329  |

| Functional<br>mPW1PW91 | Solvent?<br>PCI                                                                            |                                                                                             | Basis Set<br>6-311+G(d,p) |          | Type of Data<br>Unscaled Shifts |          |
|------------------------|--------------------------------------------------------------------------------------------|---------------------------------------------------------------------------------------------|---------------------------|----------|---------------------------------|----------|
|                        | Isomer 1                                                                                   | Isomer 2                                                                                    | Isomer 3                  | Isomer 4 | Isomer 5                        | Isomer 6 |
| sDP4+ (H data)         | 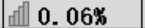 0.06%    |  99.94%    | -                         | -        | -                               | -        |
| sDP4+ (C data)         |  0.92%   |  99.08%   | -                         | -        | -                               | -        |
| sDP4+ (all data)       |  0.00%  |  100.00% | -                         | -        | -                               | -        |
| uDP4+ (H data)         |  0.53%  |  99.47%  | -                         | -        | -                               | -        |
| uDP4+ (C data)         |  62.69% |  37.31%  | -                         | -        | -                               | -        |
| uDP4+ (all data)       |  0.88%  |  99.12%  | -                         | -        | -                               | -        |
| DP4+ (H data)          |  0.00%  |  100.00% | -                         | -        | -                               | -        |
| DP4+ (C data)          |  1.53%  |  98.47%  | -                         | -        | -                               | -        |
| DP4+ (all data)        |  0.00%  |  100.00% | -                         | -        | -                               | -        |

**Figure S6:** DP4<sup>+</sup> results of candidate(7*R*,10*R*)-1 (Isomer 1) and (7*R*,11*S*)-1 (Isomer 2).

| Functional<br>mPW1PW91 | Solvent?<br>PCI                                                                           |                                                                                             | Basis Set<br>6-311+G(d,p) |          | Type of Data<br>Unscaled Shifts |          |
|------------------------|-------------------------------------------------------------------------------------------|---------------------------------------------------------------------------------------------|---------------------------|----------|---------------------------------|----------|
|                        | Isomer 1                                                                                  | Isomer 2                                                                                    | Isomer 3                  | Isomer 4 | Isomer 5                        | Isomer 6 |
| sDP4+ (H data)         |  0.00% |  100.00% | -                         | -        | -                               | -        |
| sDP4+ (C data)         |  2.67% |  97.33%  | -                         | -        | -                               | -        |
| sDP4+ (all data)       |  0.00% |  100.00% | -                         | -        | -                               | -        |
| uDP4+ (H data)         |  0.00% |  100.00% | -                         | -        | -                               | -        |
| uDP4+ (C data)         |  0.02% |  99.98%  | -                         | -        | -                               | -        |
| uDP4+ (all data)       |  0.00% |  100.00% | -                         | -        | -                               | -        |
| DP4+ (H data)          |  0.00% |  100.00% | -                         | -        | -                               | -        |
| DP4+ (C data)          |  0.00% |  100.00% | -                         | -        | -                               | -        |
| DP4+ (all data)        |  0.00% |  100.00% | -                         | -        | -                               | -        |

**Figure S7:** DP4<sup>+</sup> results of candidate(7*R*,10*R*,11*R*)-3 (Isomer 1) and (7*R*,10*R*,11*S*)-3 (Isomer 2).

| Functional       | Solvent? |          | Basis Set    |          | Type of Data    |          |
|------------------|----------|----------|--------------|----------|-----------------|----------|
| mPW1PW91         | PCI      |          | 6-311+G(d,p) |          | Unscaled Shifts |          |
|                  | Isomer 1 | Isomer 2 | Isomer 3     | Isomer 4 | Isomer 5        | Isomer 6 |
| sDP4+ (H data)   | 0.00%    | 100.00%  | -            | -        | -               | -        |
| sDP4+ (C data)   | 62.34%   | 37.66%   | -            | -        | -               | -        |
| sDP4+ (all data) | 0.00%    | 100.00%  | -            | -        | -               | -        |
| uDP4+ (H data)   | 0.00%    | 100.00%  | -            | -        | -               | -        |
| uDP4+ (C data)   | 0.20%    | 99.80%   | -            | -        | -               | -        |
| uDP4+ (all data) | 0.00%    | 100.00%  | -            | -        | -               | -        |
| DP4+ (H data)    | 0.00%    | 100.00%  | -            | -        | -               | -        |
| DP4+ (C data)    | 0.33%    | 99.67%   | -            | -        | -               | -        |
| DP4+ (all data)  | 0.00%    | 100.00%  | -            | -        | -               | -        |

**Figure S8:** DP4<sup>+</sup> results of candidate(7S,10S,11S)-5 (Isomer 1) and (7R,10R,11S)-5 (Isomer 2).

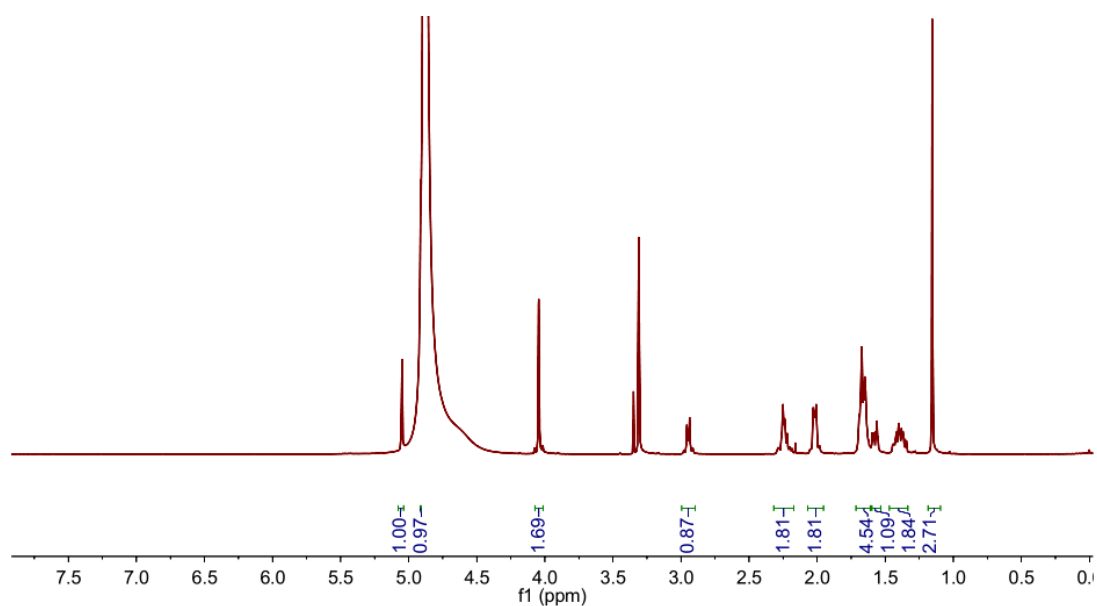

**Figure S9:** <sup>1</sup>H NMR (500 MHz) spectrum of 1 in CD<sub>3</sub>OD.

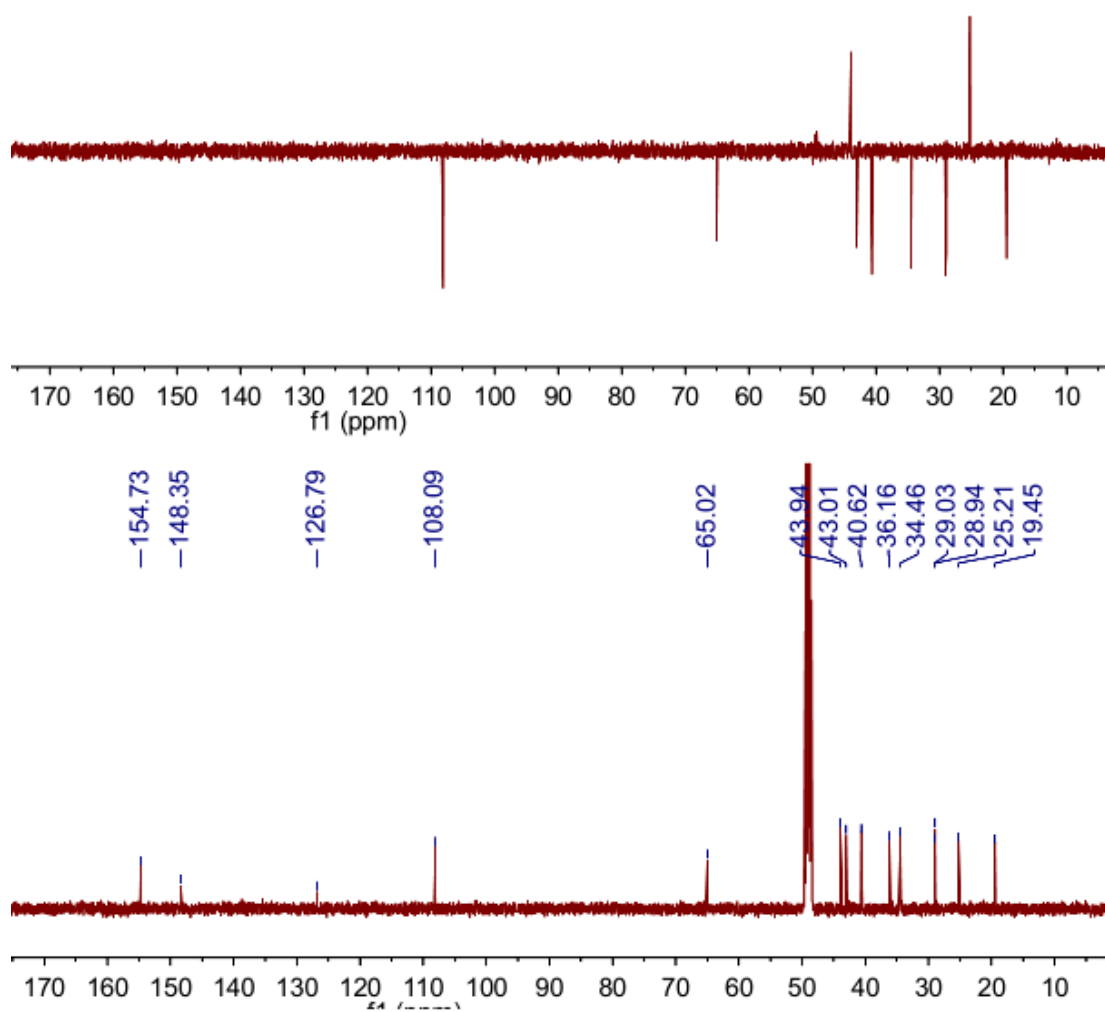

**Figure S10:**  $^{13}\text{C}$  NMR and DEPT (125 MHz) spectra of **1** in  $\text{CD}_3\text{OD}$ .



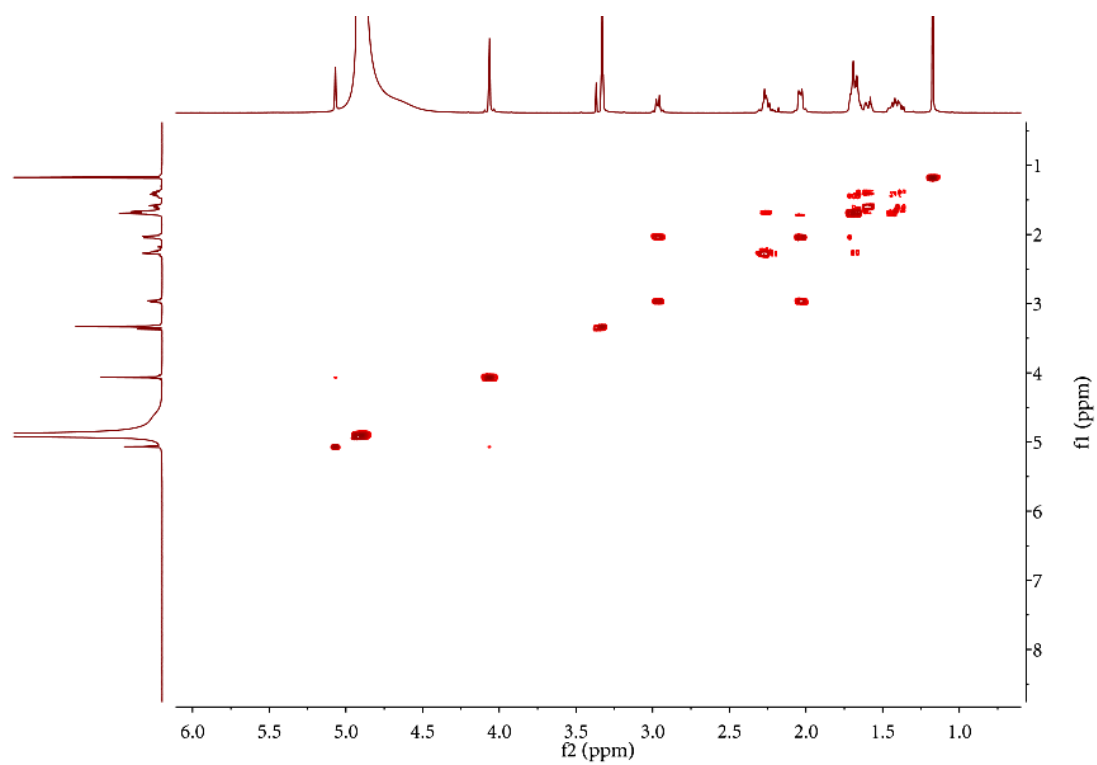

**Figure S11:**  $^1\text{H}$ - $^1\text{H}$  COSY (500 MHz) spectrum of **1** in  $\text{CD}_3\text{OD}$ .

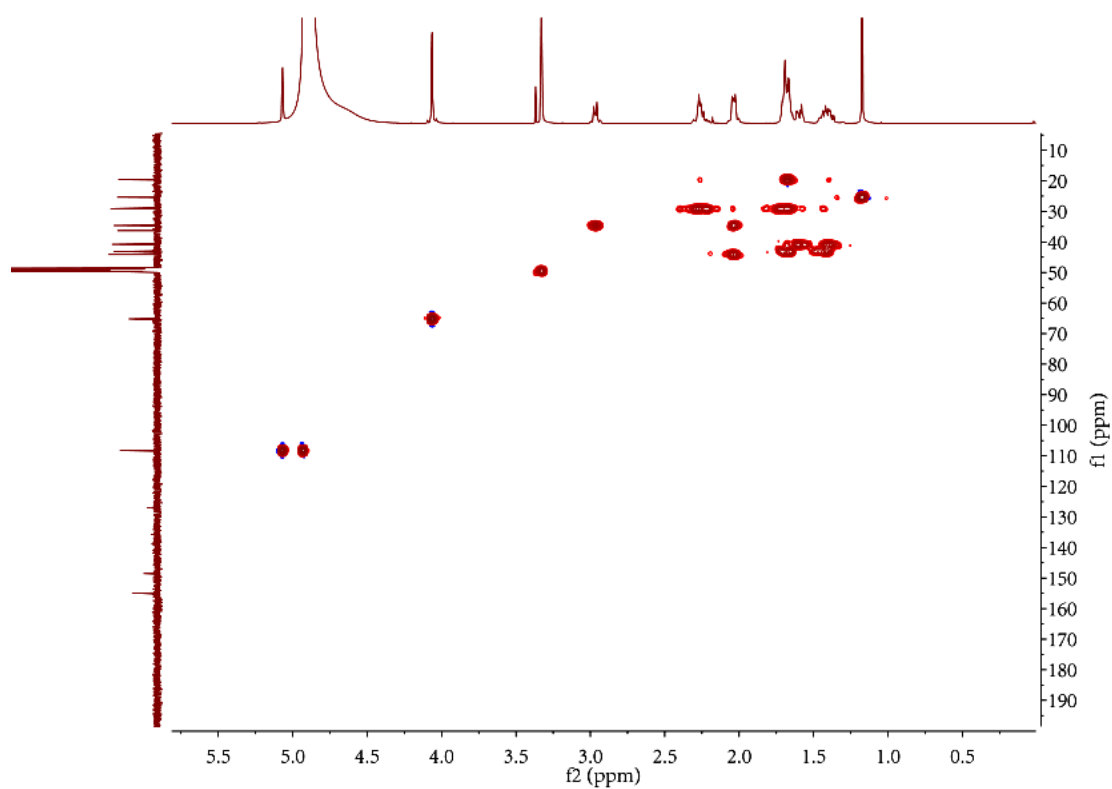

**Figure S12:** HSQC (500 MHz) spectrum of **1** in  $\text{CD}_3\text{OD}$ .

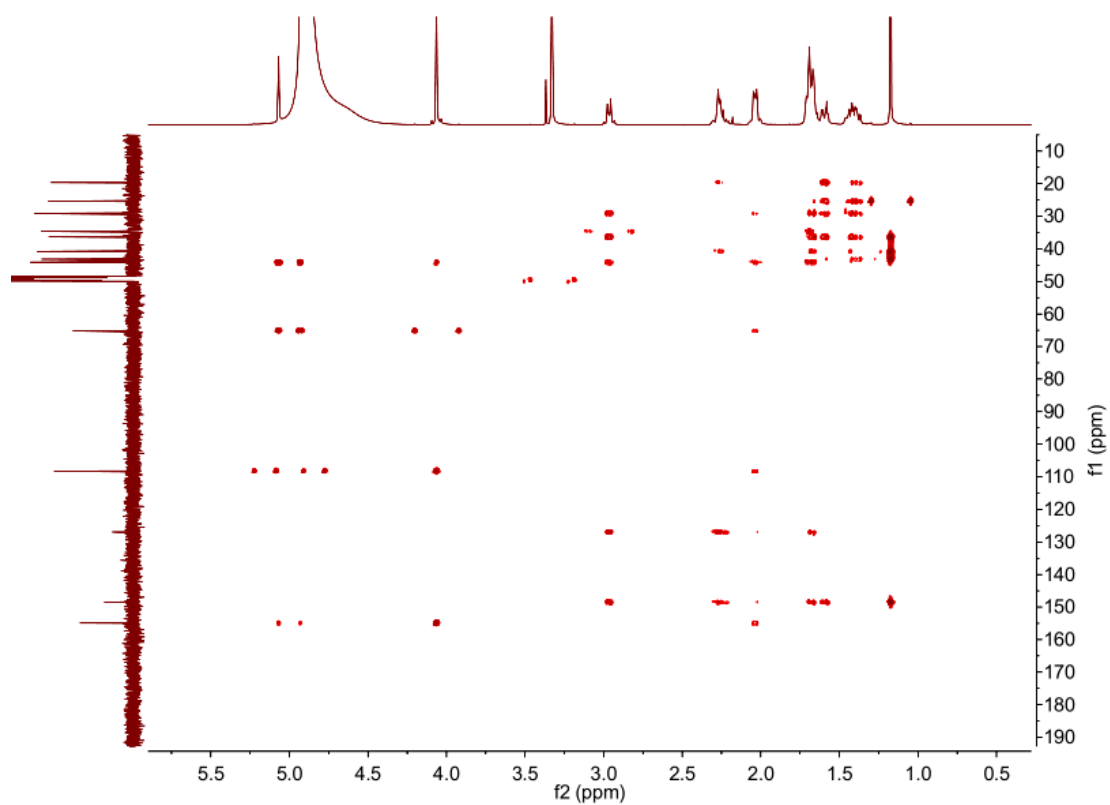

**Figure S13:** HSQC (500 MHz) spectrum of **1** in CD<sub>3</sub>OD.

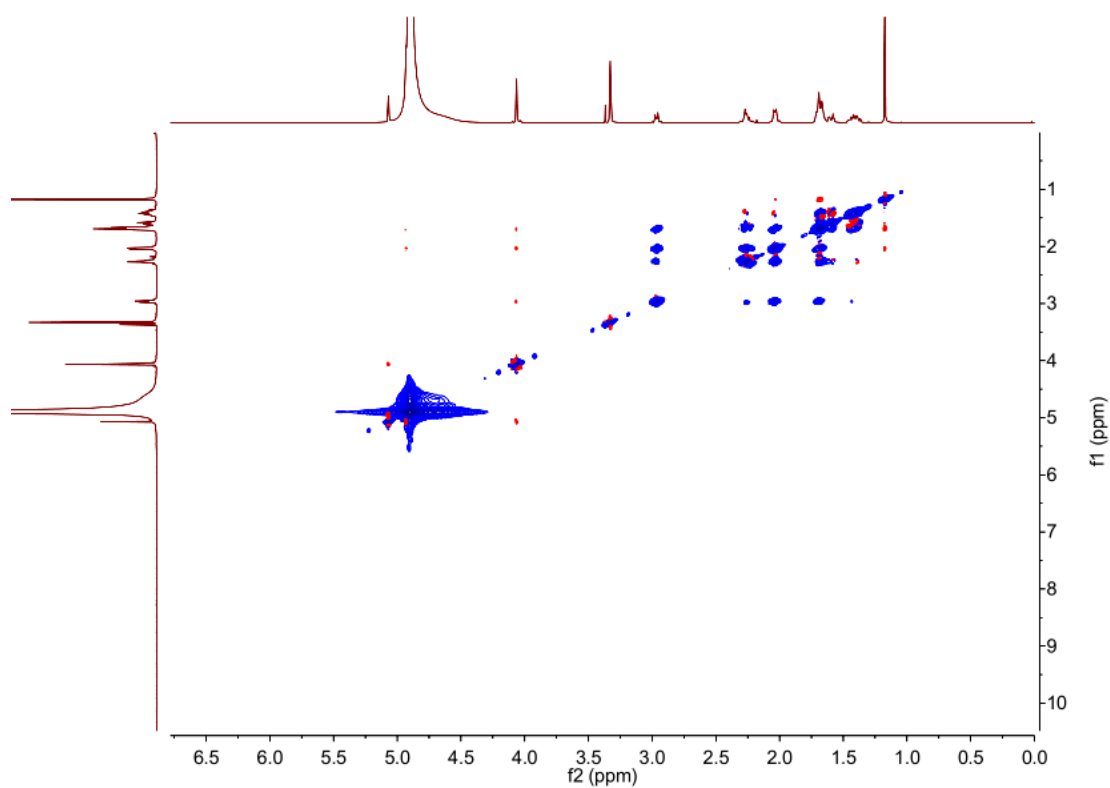

**Figure S14:** ROSEY (500 MHz) spectrum of **1** in CD<sub>3</sub>OD.

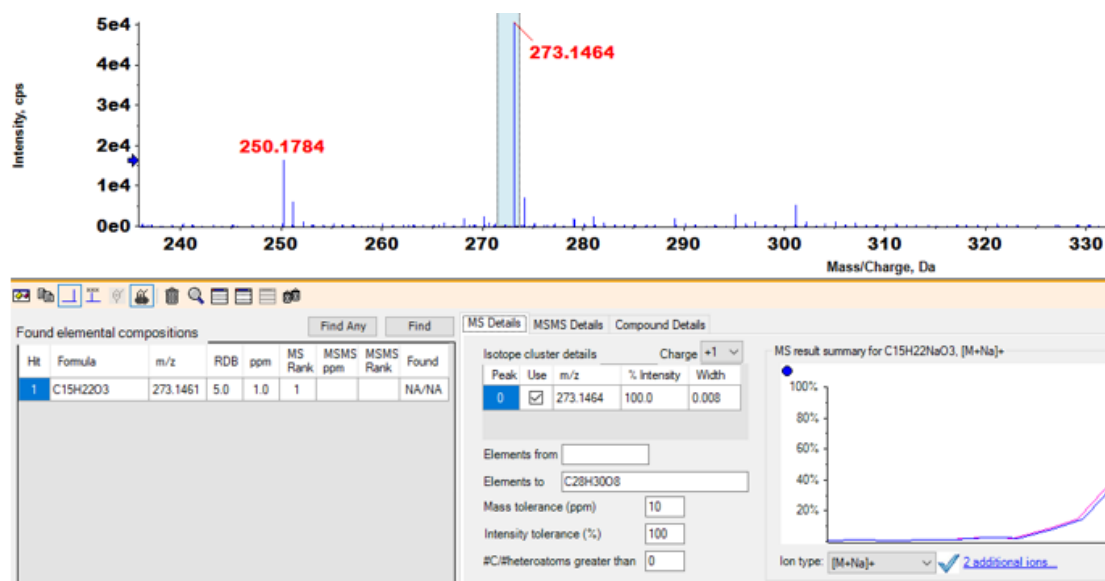

Figure S15: HRESIMS of **1**.

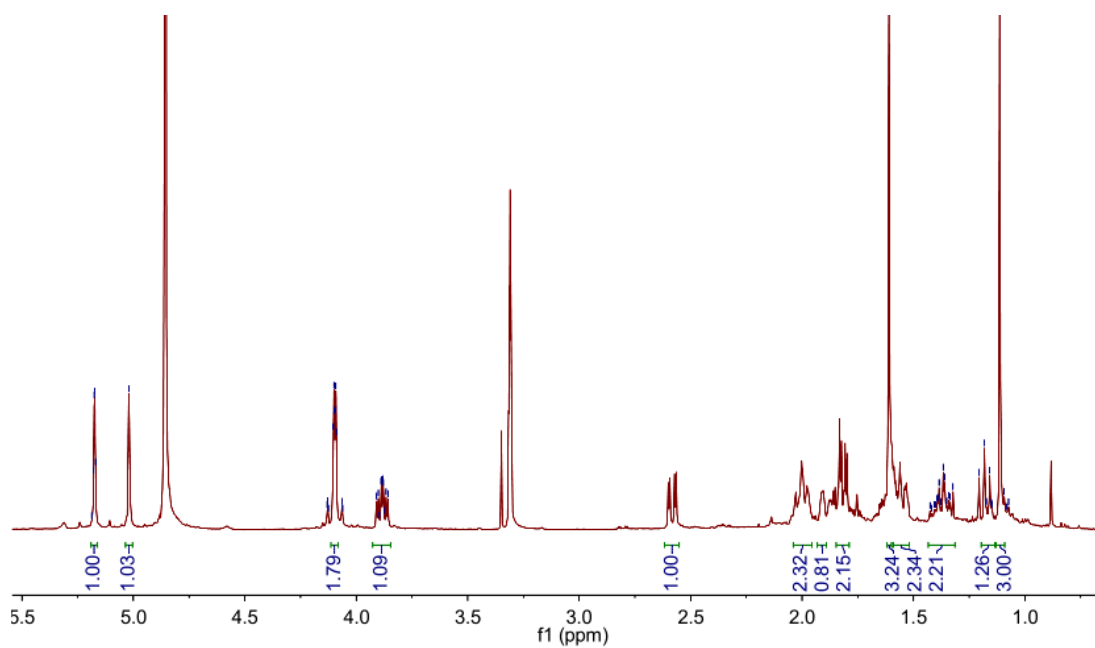

Figure S16: <sup>1</sup>H NMR (500 MHz) spectrum of **2** in CD<sub>3</sub>OD.

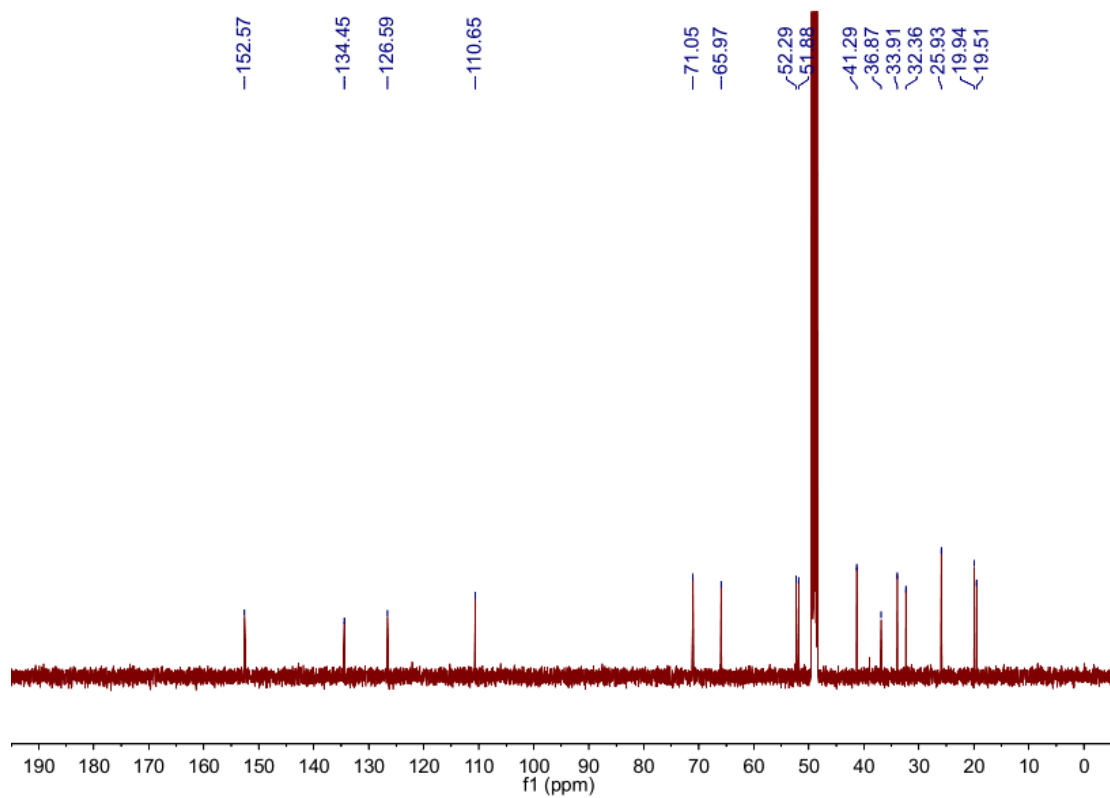

**Figure S17:**  $^{13}\text{C}$  NMR (125MHz) spectrum of **2** in  $\text{CD}_3\text{OD}$ .

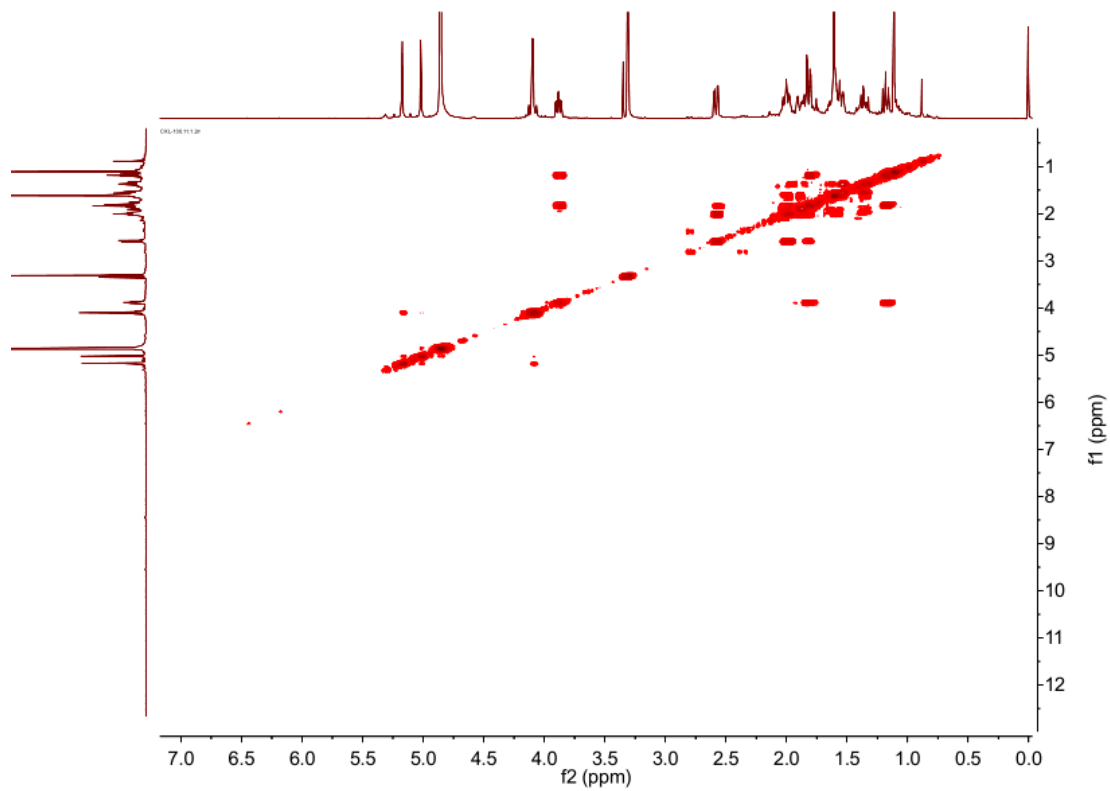

**Figure S18:**  $^1\text{H}$ - $^1\text{H}$  COSY (500 MHz) spectrum of **2** in  $\text{CD}_3\text{OD}$ .

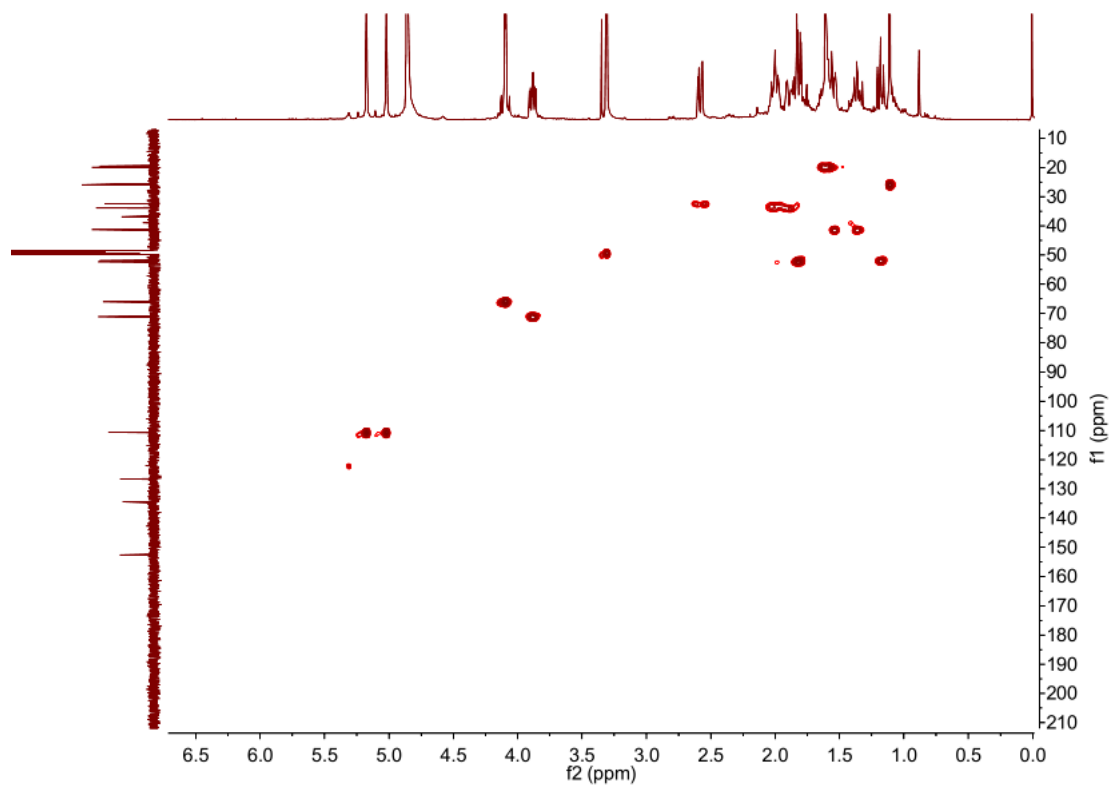

**Figure S19:** HSQC (500 MHz) spectrum of **2** in CD<sub>3</sub>OD.

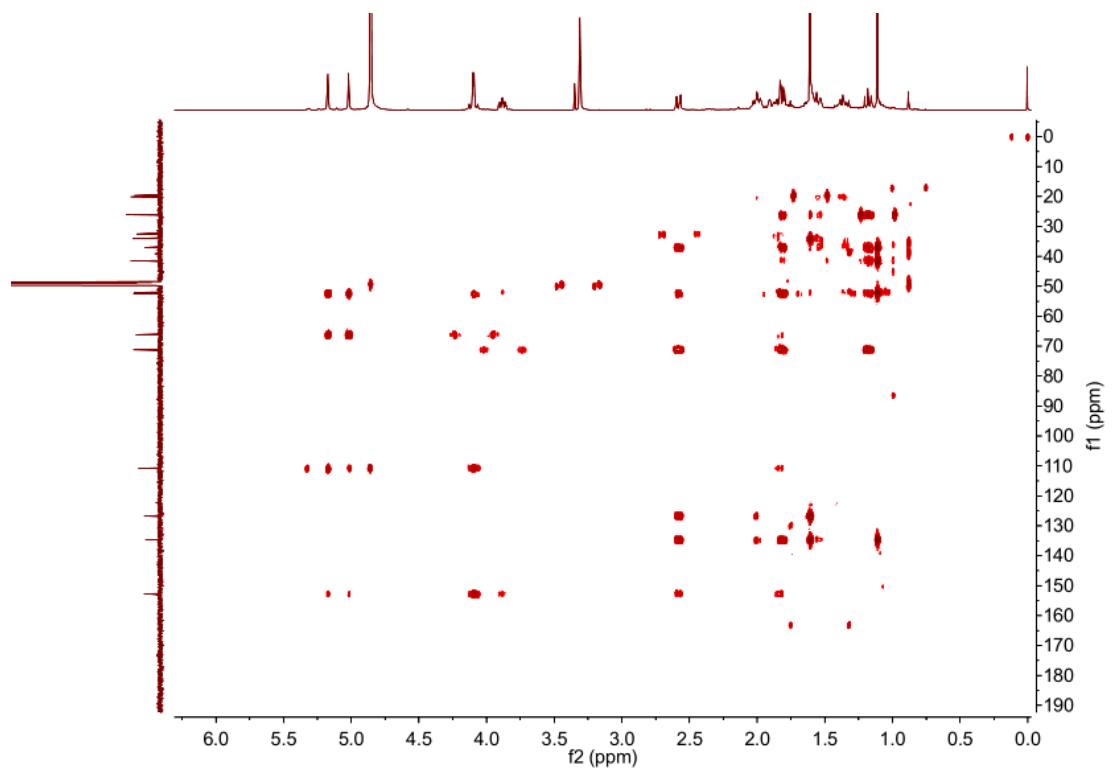

**Figure S20:** HSBC (500 MHz) spectrum of **2** in CD<sub>3</sub>OD.

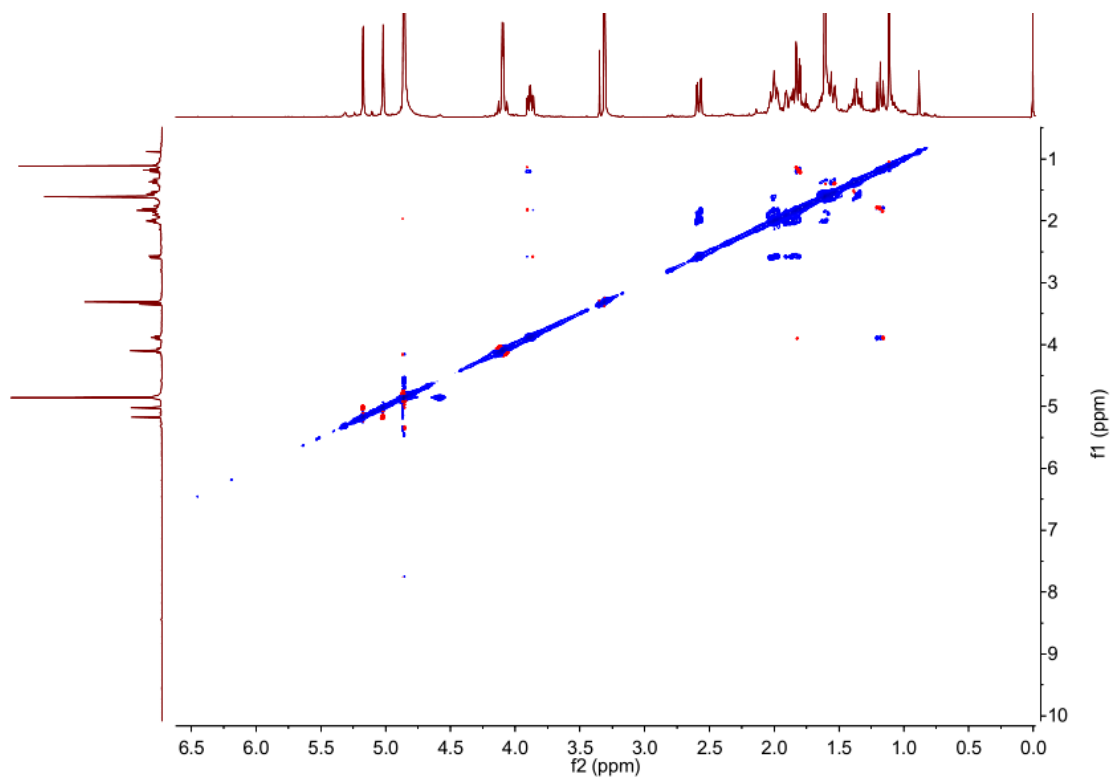

Figure S21: ROSEY (500 MHz) spectrum of **2** in CD<sub>3</sub>OD.

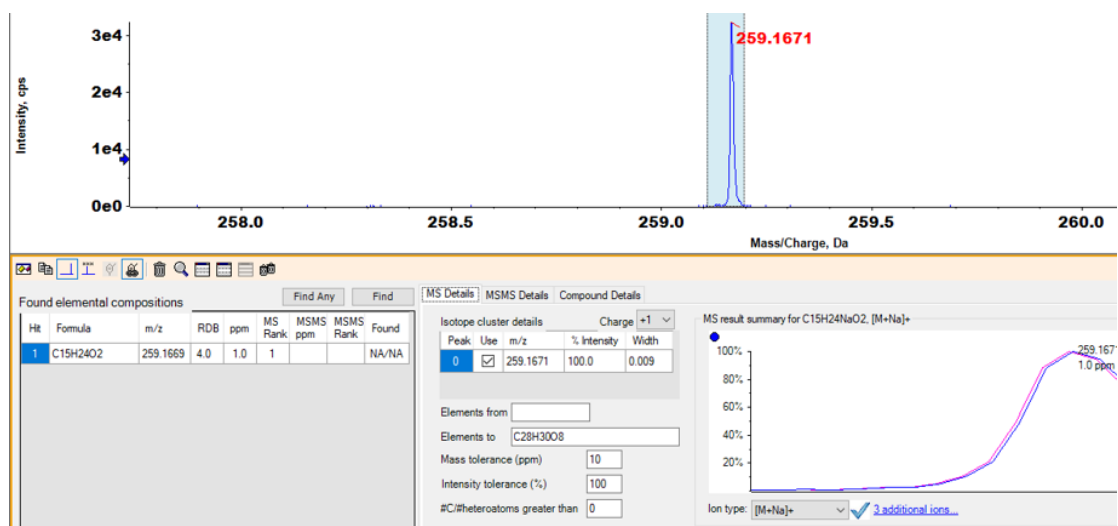

Figure S22: HRESIMS of **2**.

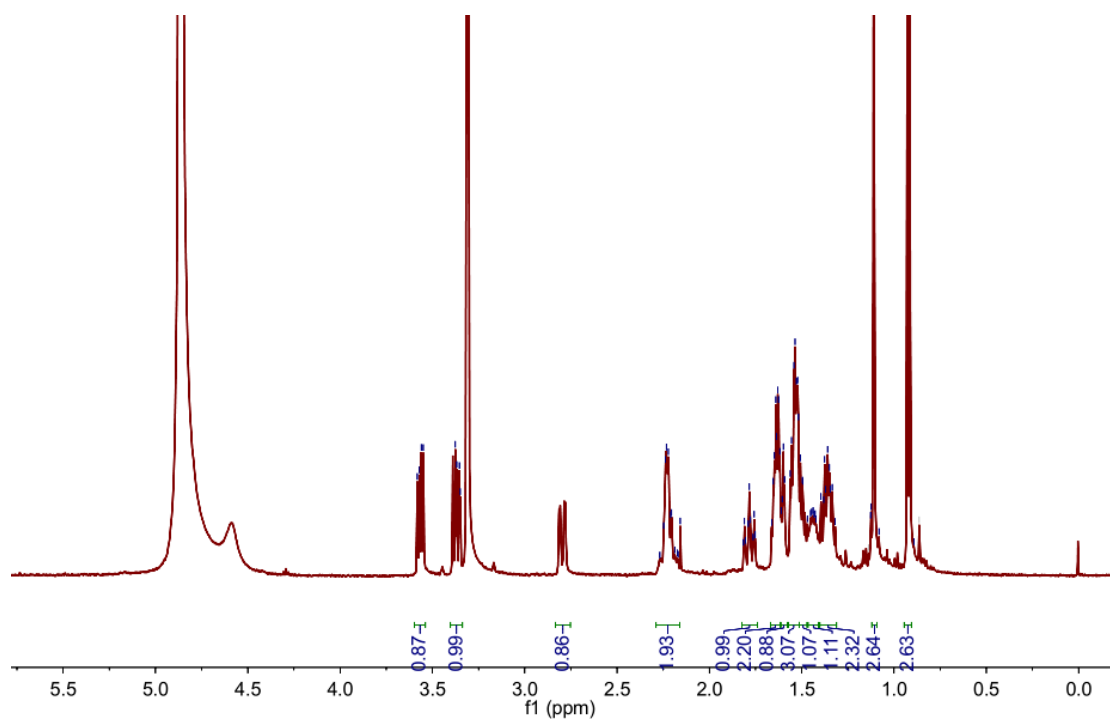

Figure S23:  $^1\text{H}$  NMR (500 MHz) spectrum of **3** in  $\text{CD}_3\text{OD}$ .

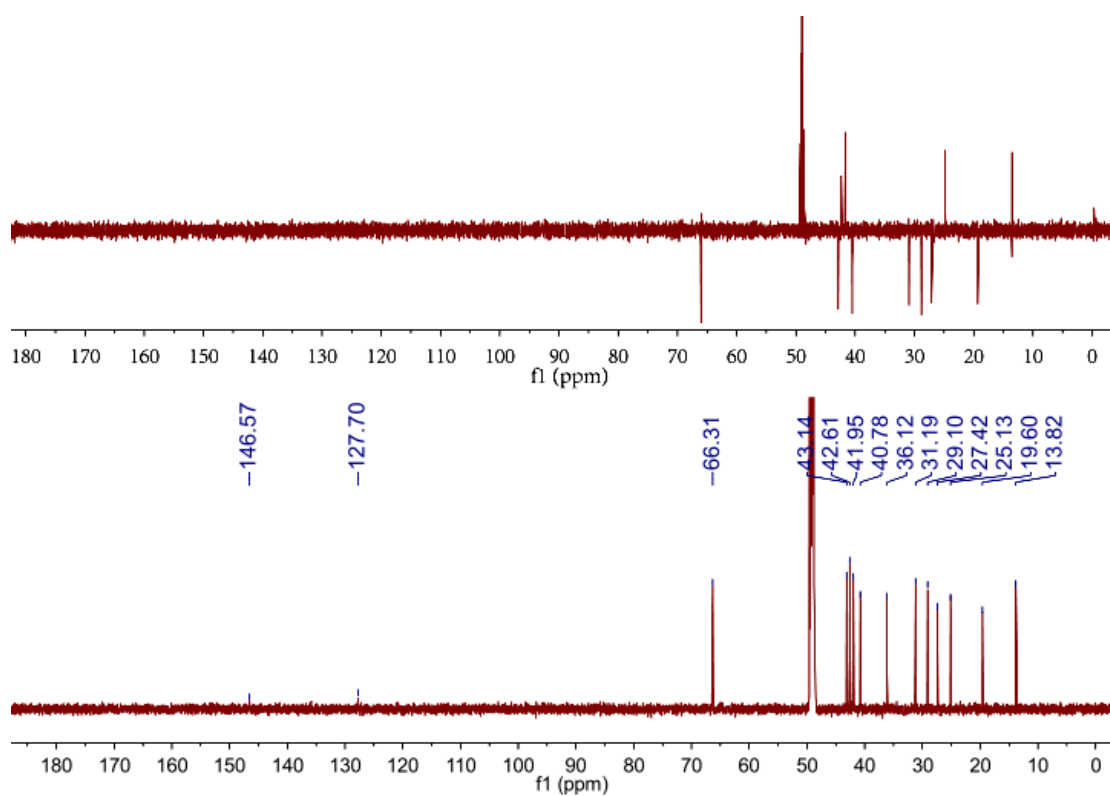

Figure S24:  $^{13}\text{C}$  NMR and DEPT (150 MHz) spectra of **3** in  $\text{CD}_3\text{OD}$ .

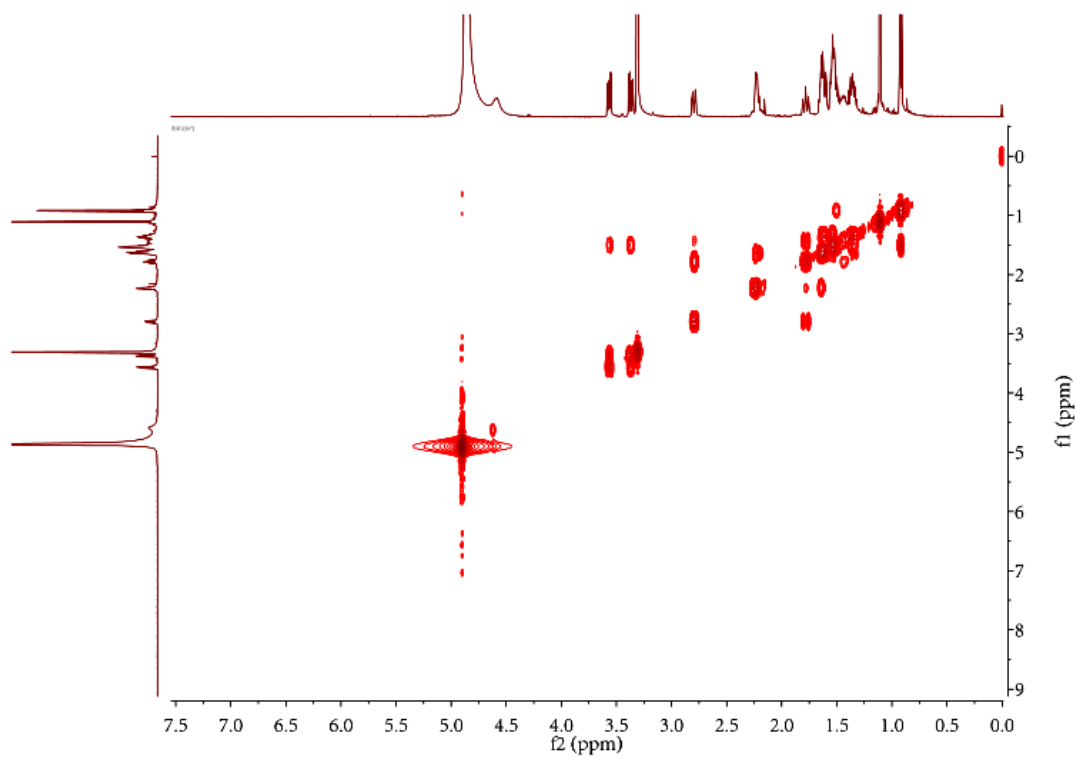

**Figure S25:**  $^1\text{H}$ - $^1\text{H}$  COSY (600 MHz) spectrum of **3** in  $\text{CD}_3\text{OD}$ .

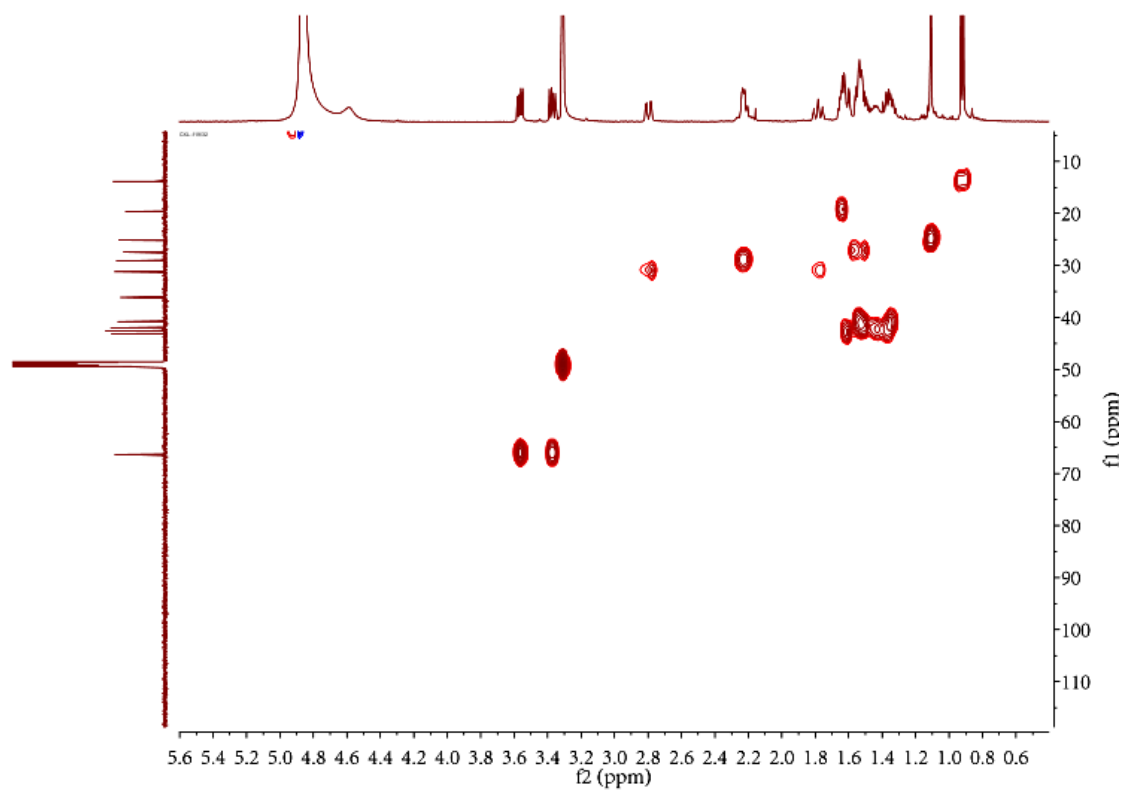

**Figure S26:** HSQC (600 MHz) spectrum of **3** in  $\text{CD}_3\text{OD}$ .



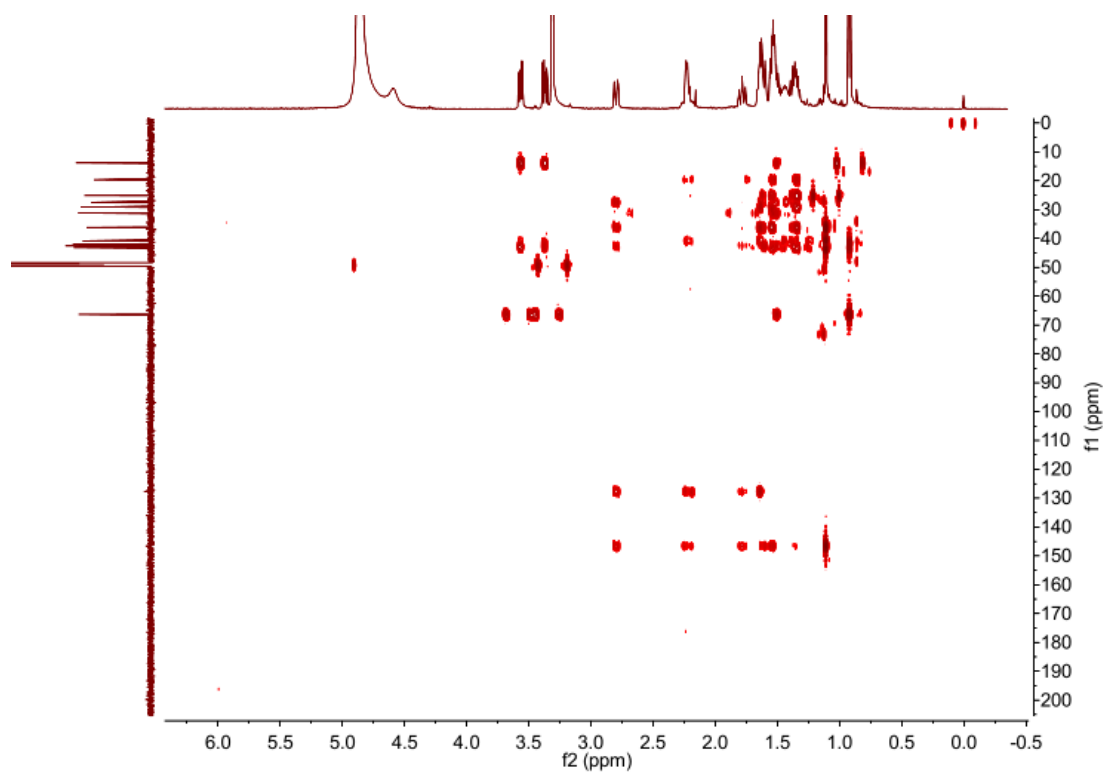

**Figure S27:** HSBC (600 MHz) spectrum of **3** in CD<sub>3</sub>OD.

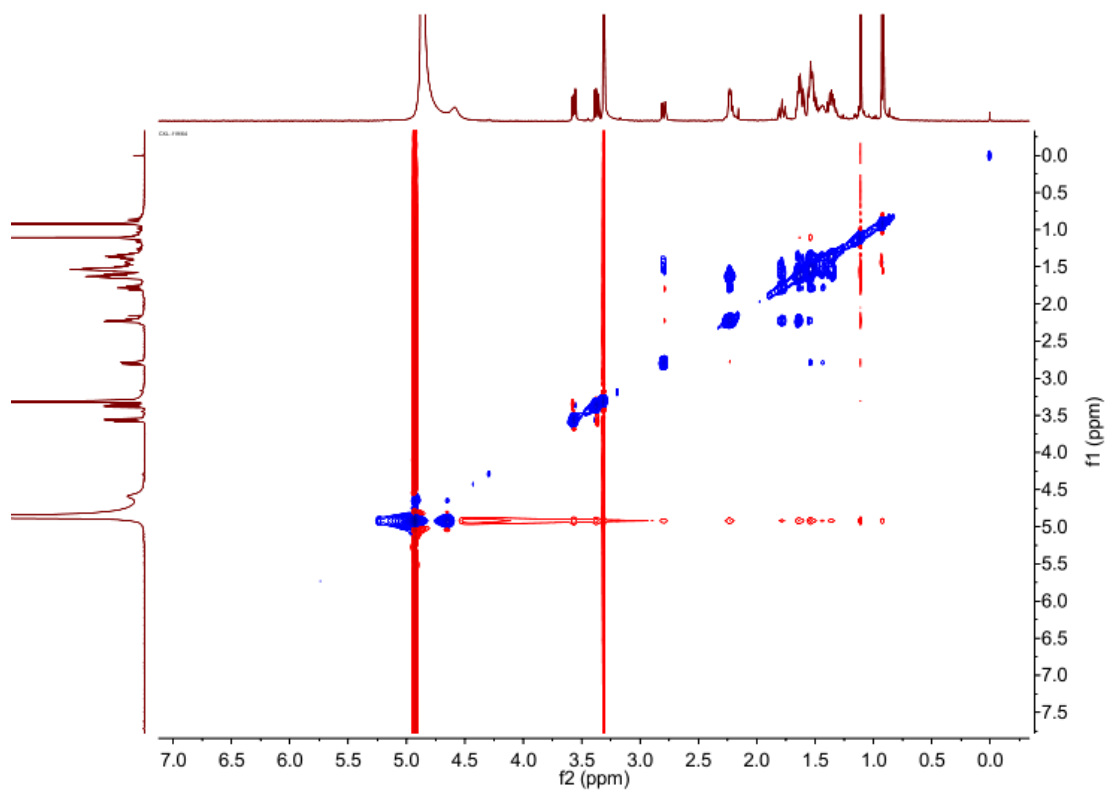

**Figure S28:** ROSEY (600 MHz) spectrum of **3** in CD<sub>3</sub>OD.

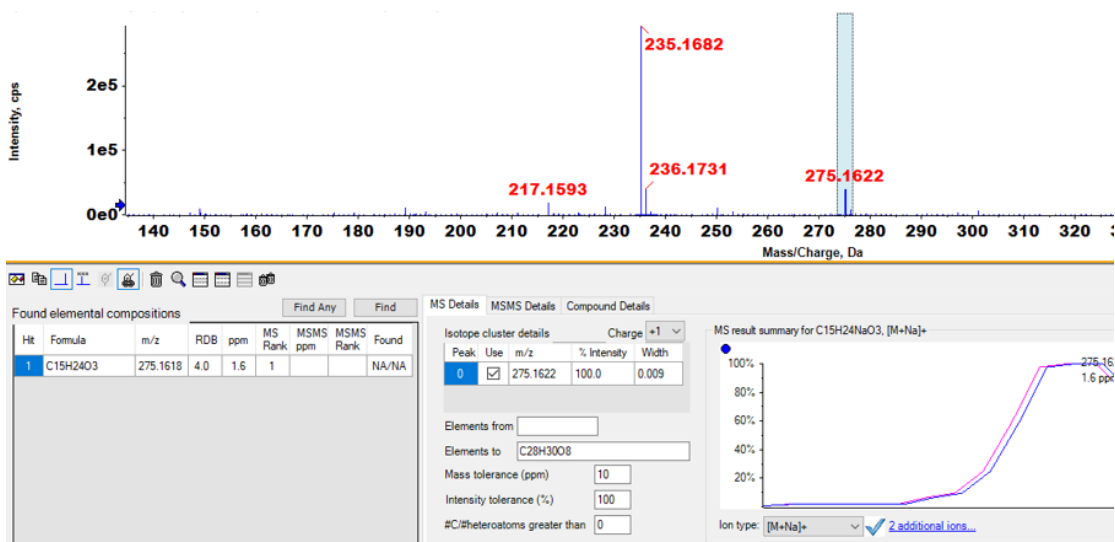

Figure S29: HRESIMS of **3**.

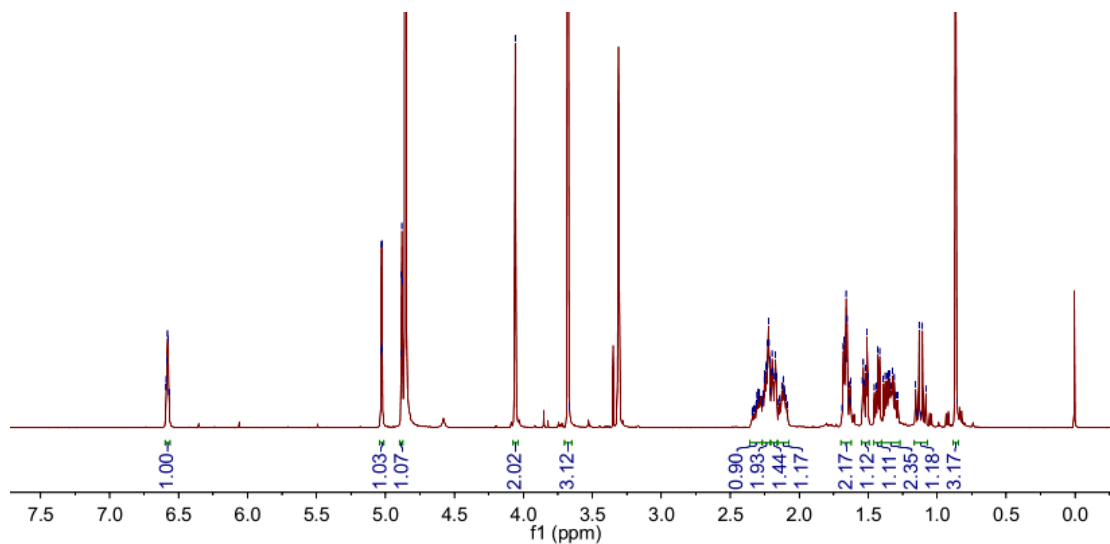

Figure S30: <sup>1</sup>H NMR (500 MHz) spectrum of **4** in CD<sub>3</sub>OD.

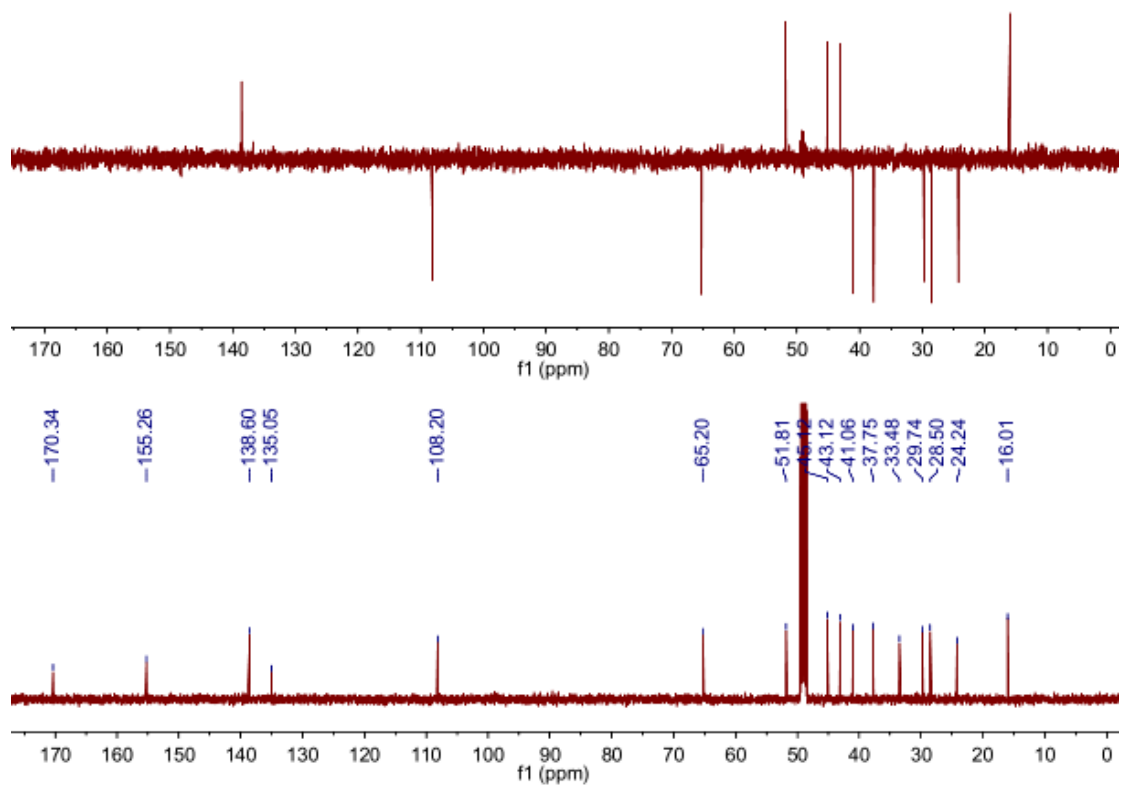

**Figure S31:**  $^{13}\text{C}$  NMR and DEPT (150 MHz) spectra of **4** in  $\text{CD}_3\text{OD}$ .

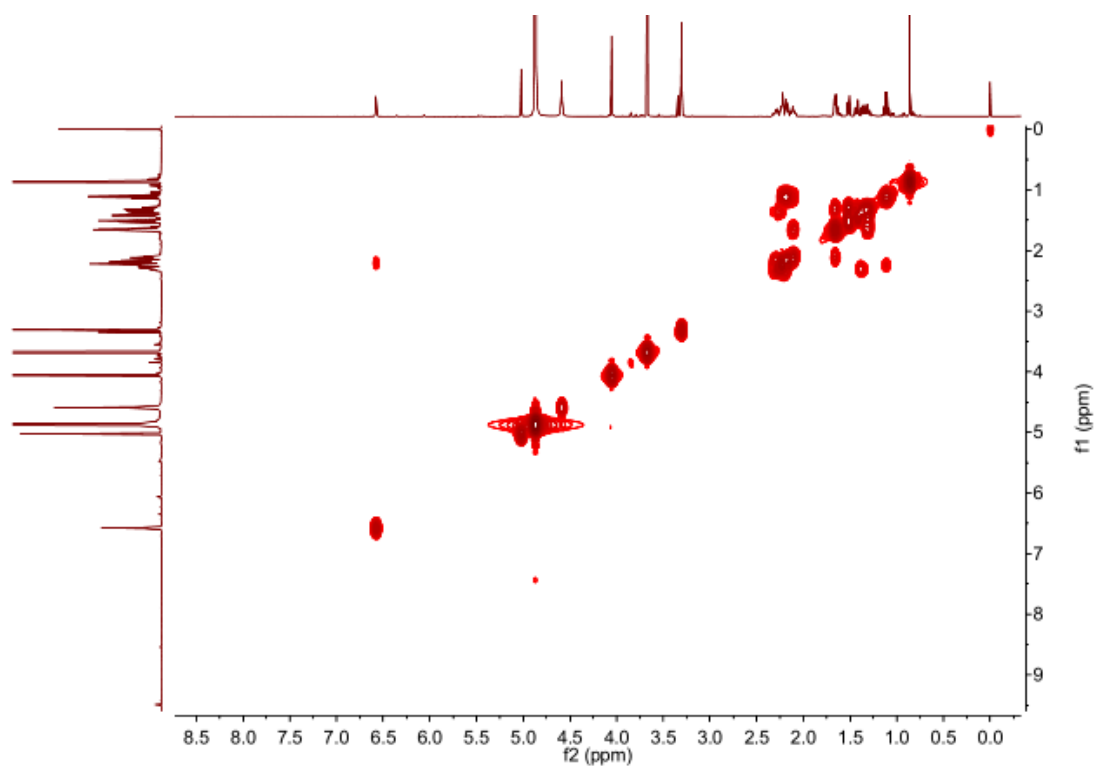

**Figure S32:**  $^1\text{H}$ - $^1\text{H}$  COSY (600 MHz) spectrum of **4** in  $\text{CD}_3\text{OD}$ .

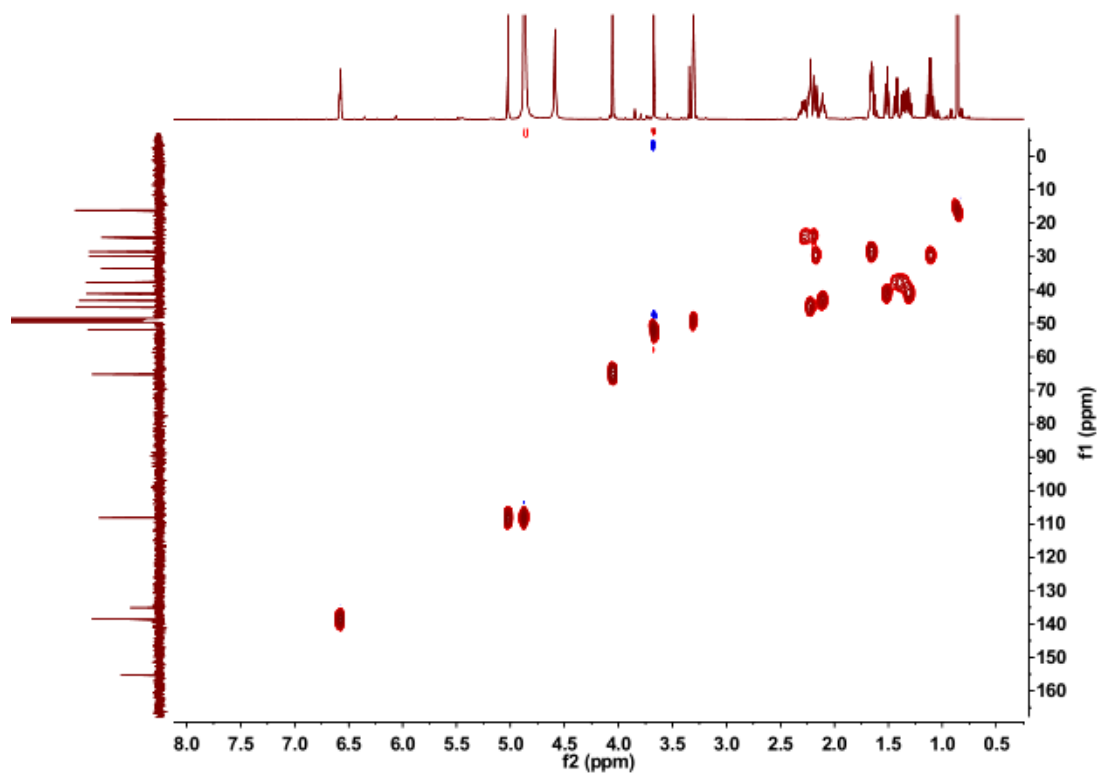

**Figure S33:** HSQC (600 MHz) spectrum of **4** in CD<sub>3</sub>OD.

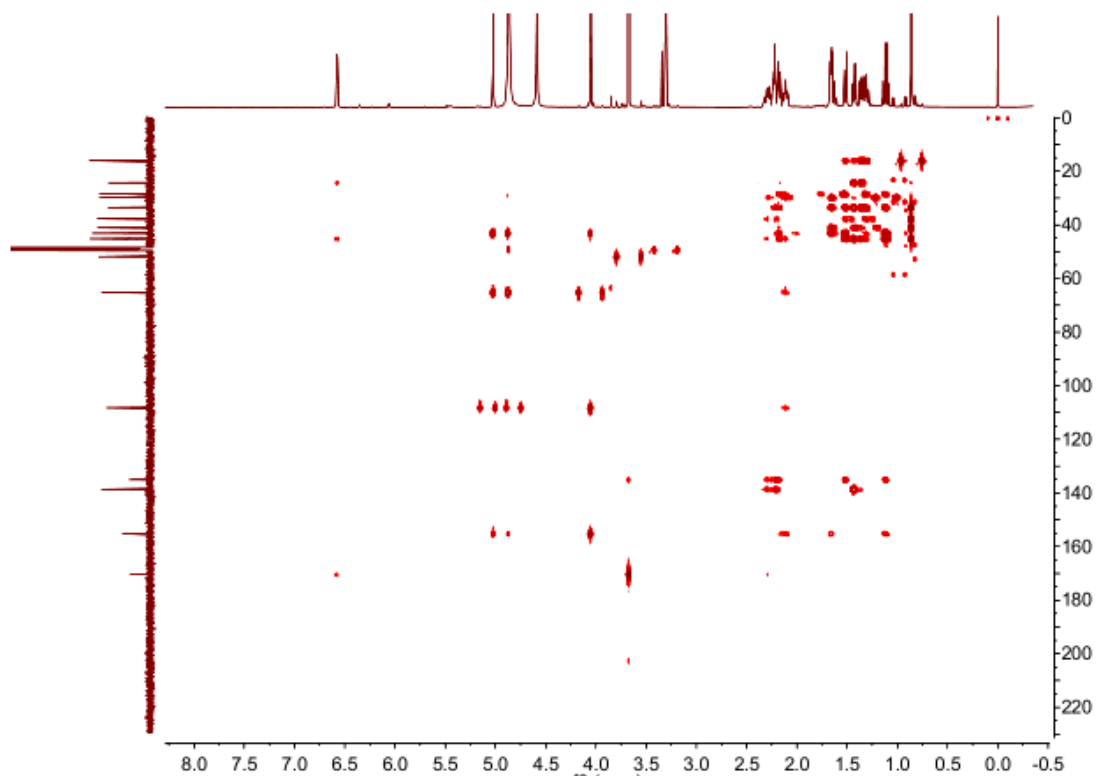

**Figure S34:** HSBC (600 MHz) spectrum of **4** in CD<sub>3</sub>OD.

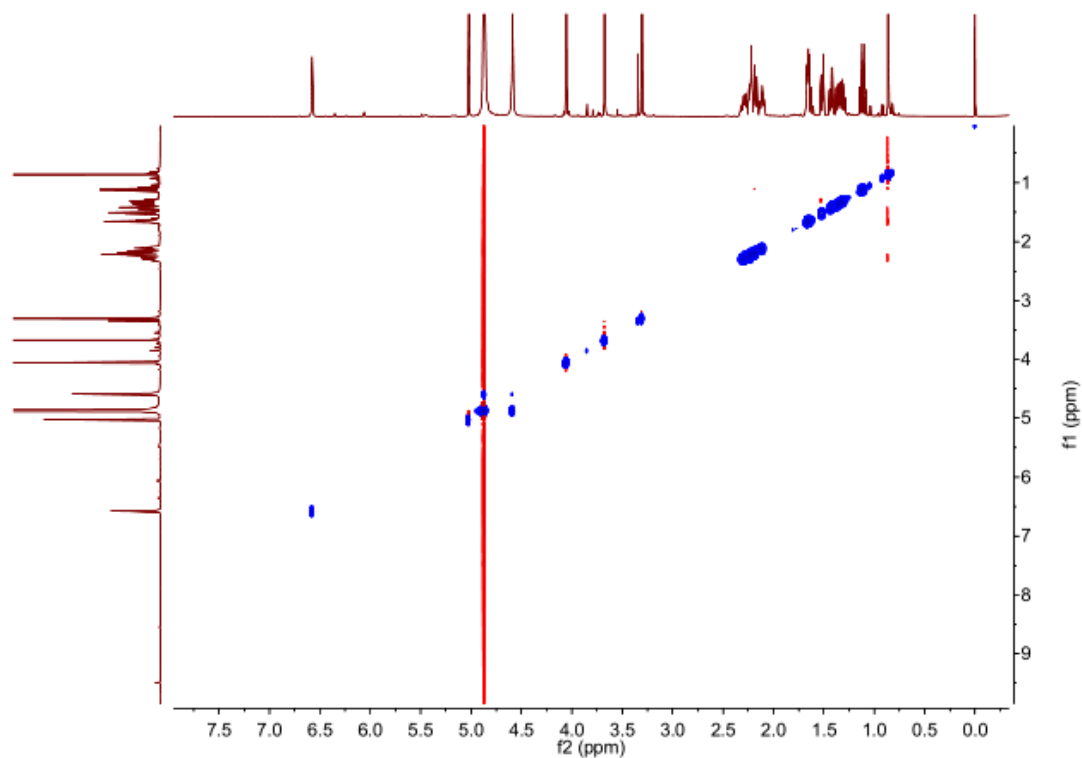

Figure S35: ROSEY (600 MHz) spectrum of **4** in CD<sub>3</sub>OD.

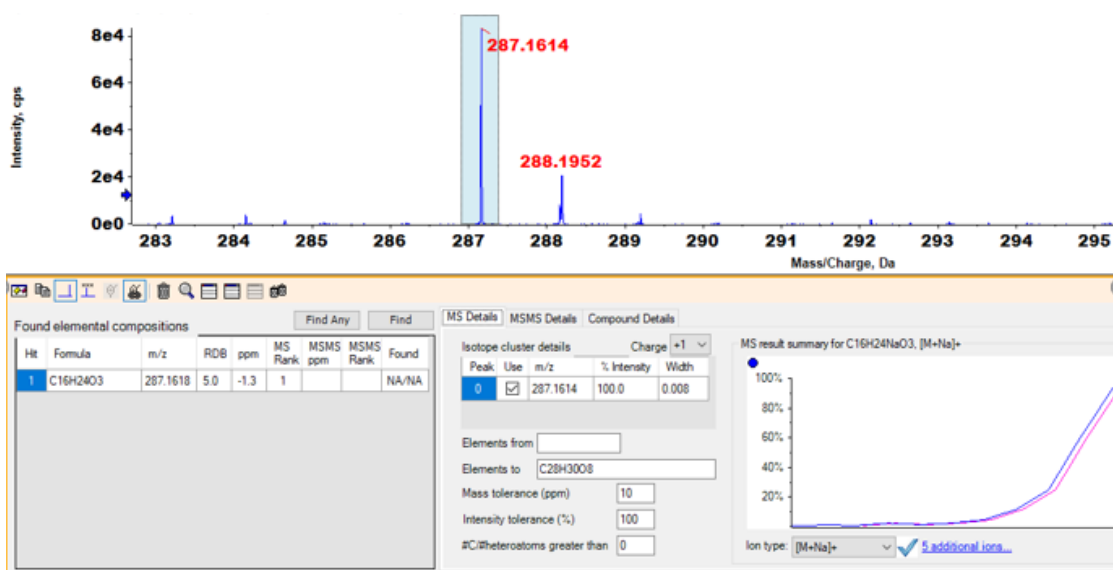

Figure S36: HRESIMS of **4**.

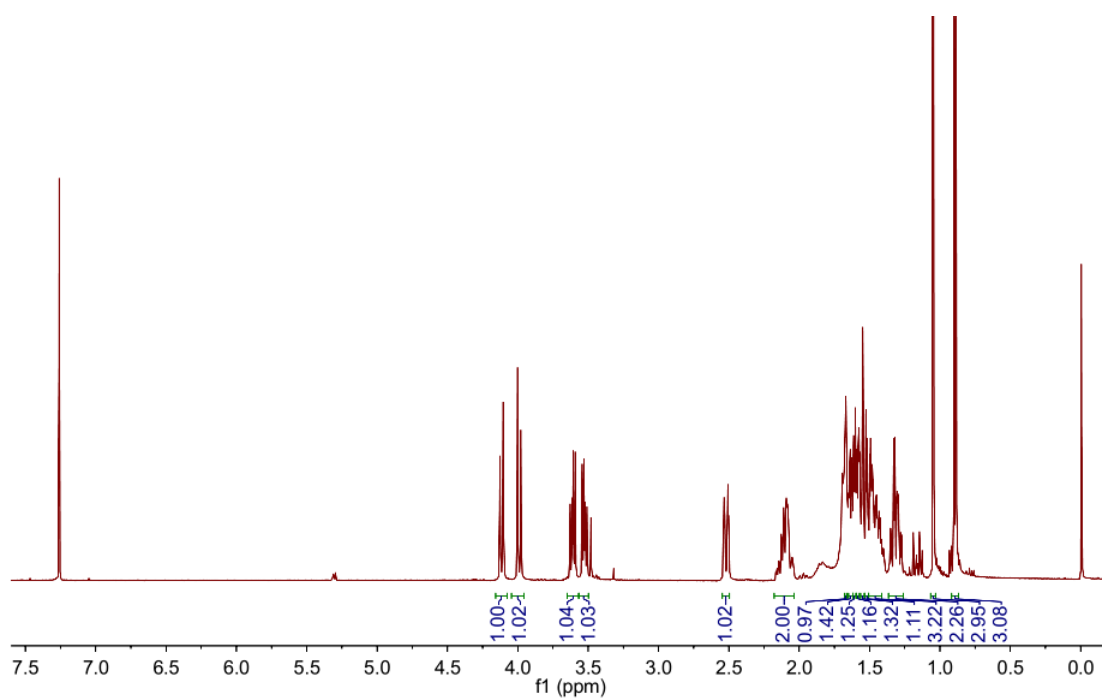

**Figure S37:**  $^1\text{H}$  NMR (500 MHz) spectrum of **5** in  $\text{CDCl}_3$ .

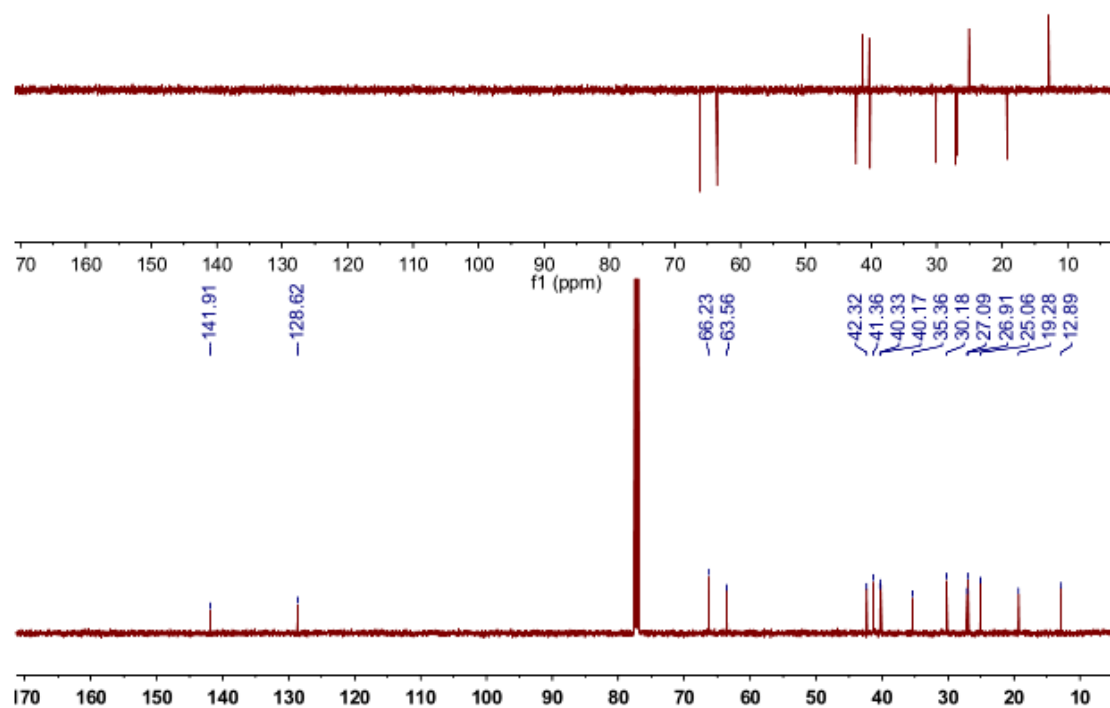

**Figure S38:**  $^{13}\text{C}$  NMR and DEPT (150 MHz) spectra of **5** in  $\text{CDCl}_3$ .

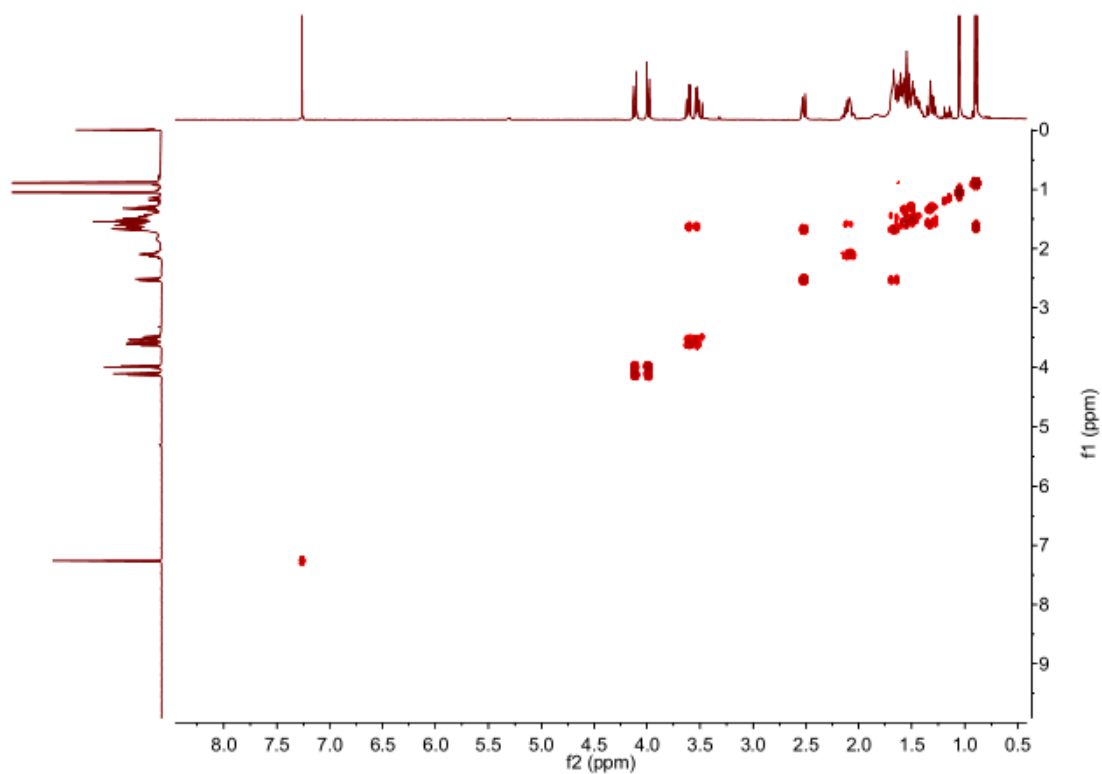

**Figure S39:**  $^1\text{H}$ - $^1\text{H}$  COSY (600 MHz) spectrum of **5** in  $\text{CDCl}_3$ .

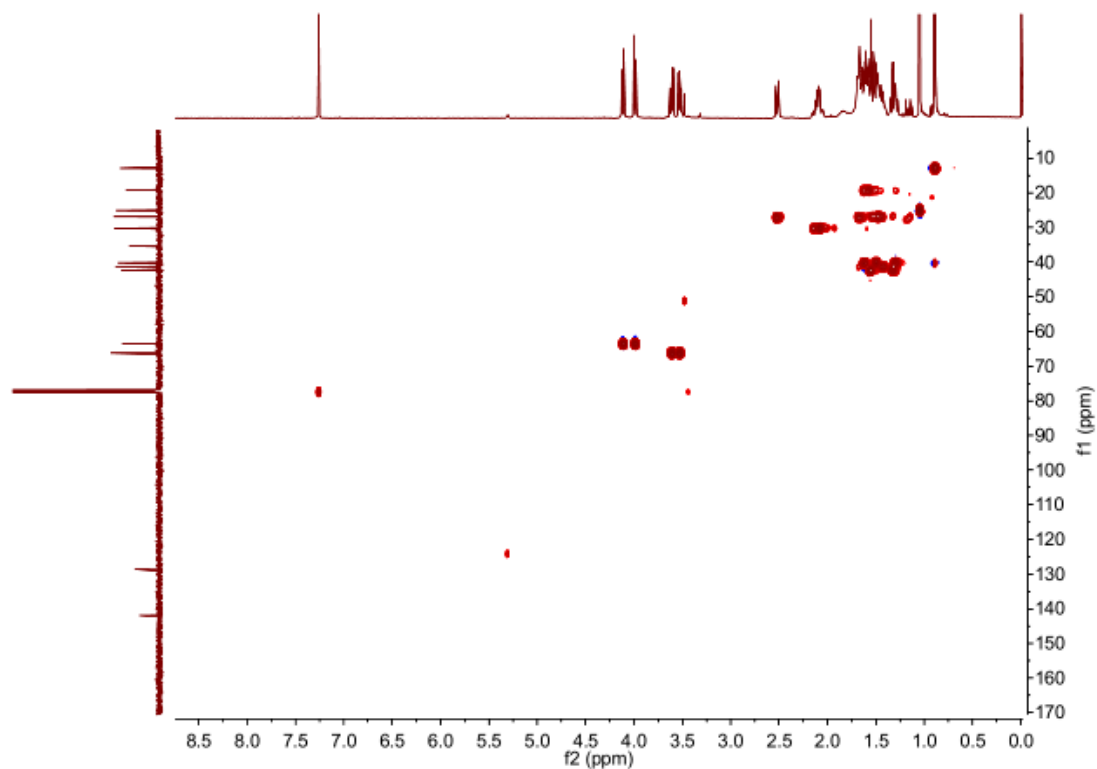

**Figure S40:** HSQC (600 MHz) spectrum of **5** in  $\text{CDCl}_3$ .

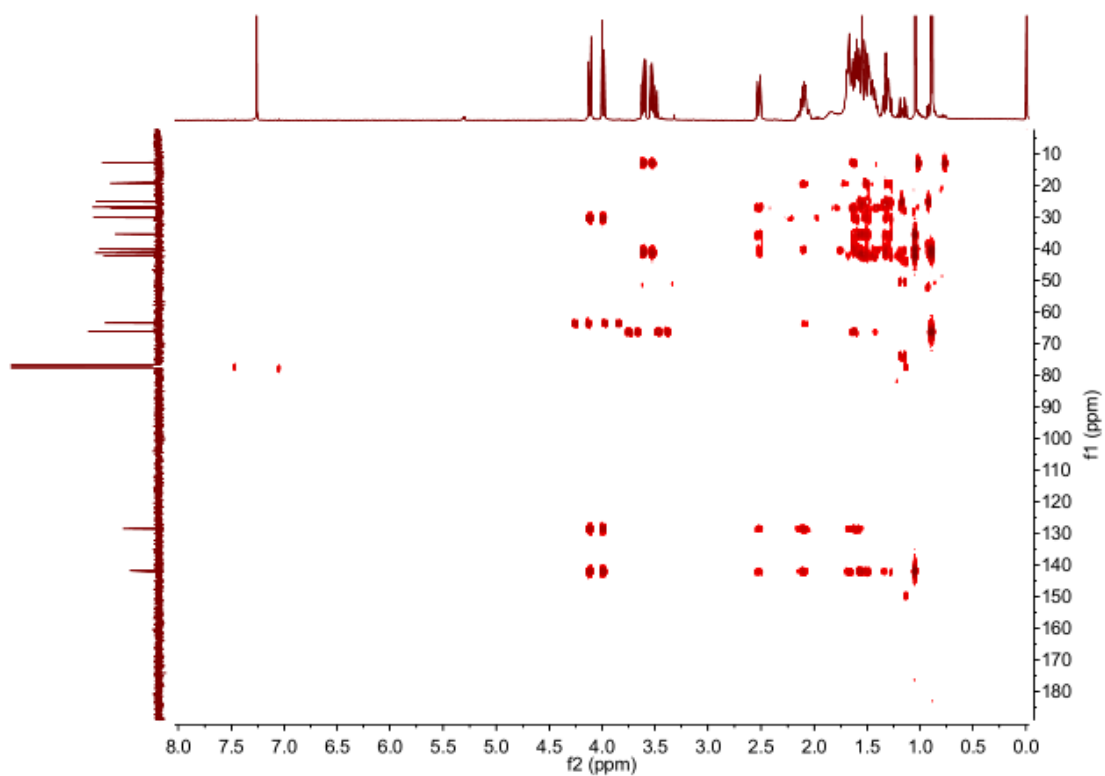

**Figure S41:** HSBC (600 MHz) spectrum of **5** in  $\text{CDCl}_3$ .

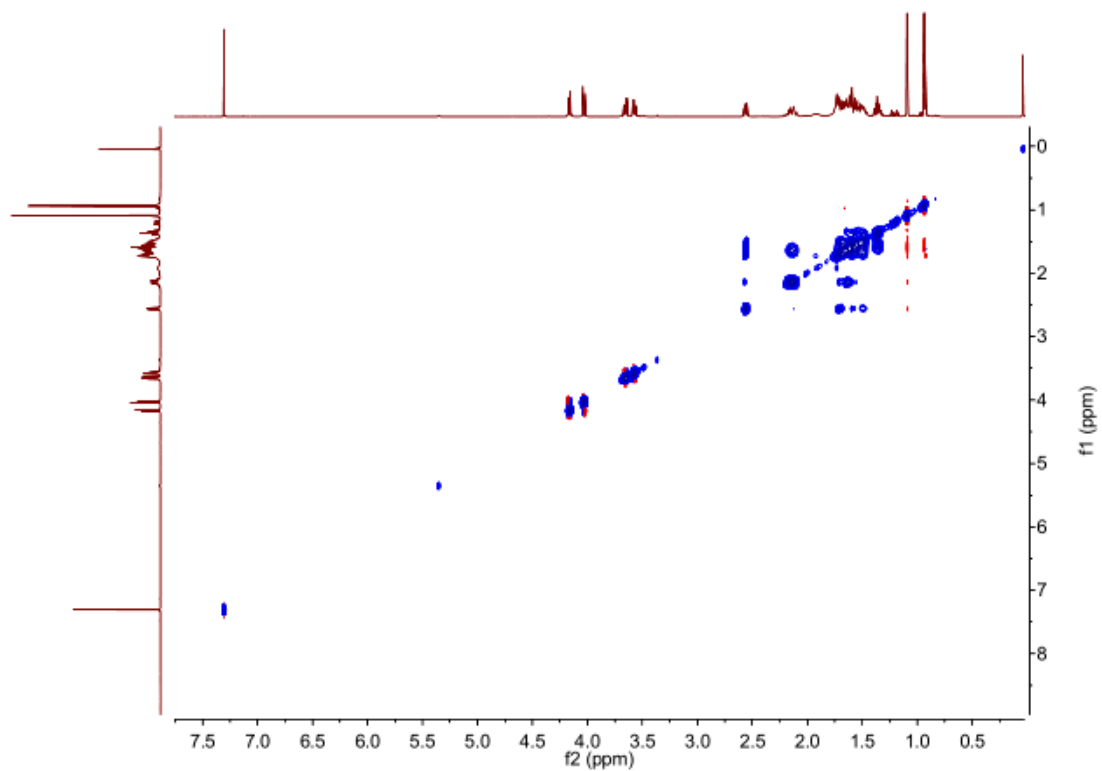

**Figure S42:** ROSEY (600 MHz) spectrum of **5** in  $\text{CDCl}_3$ .



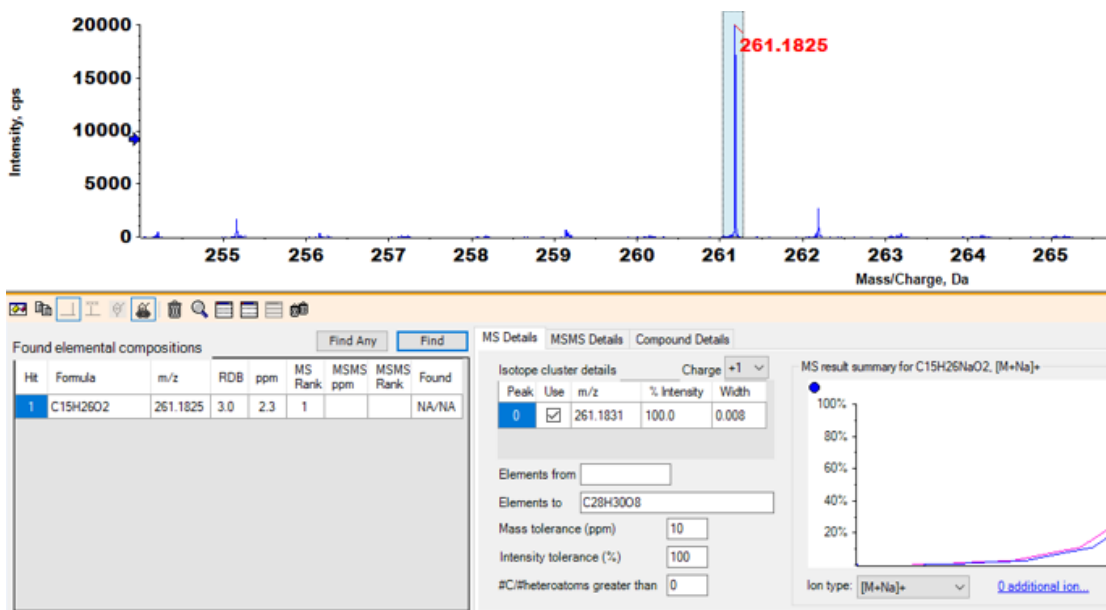

Figure S43: HRESIMS of 5.

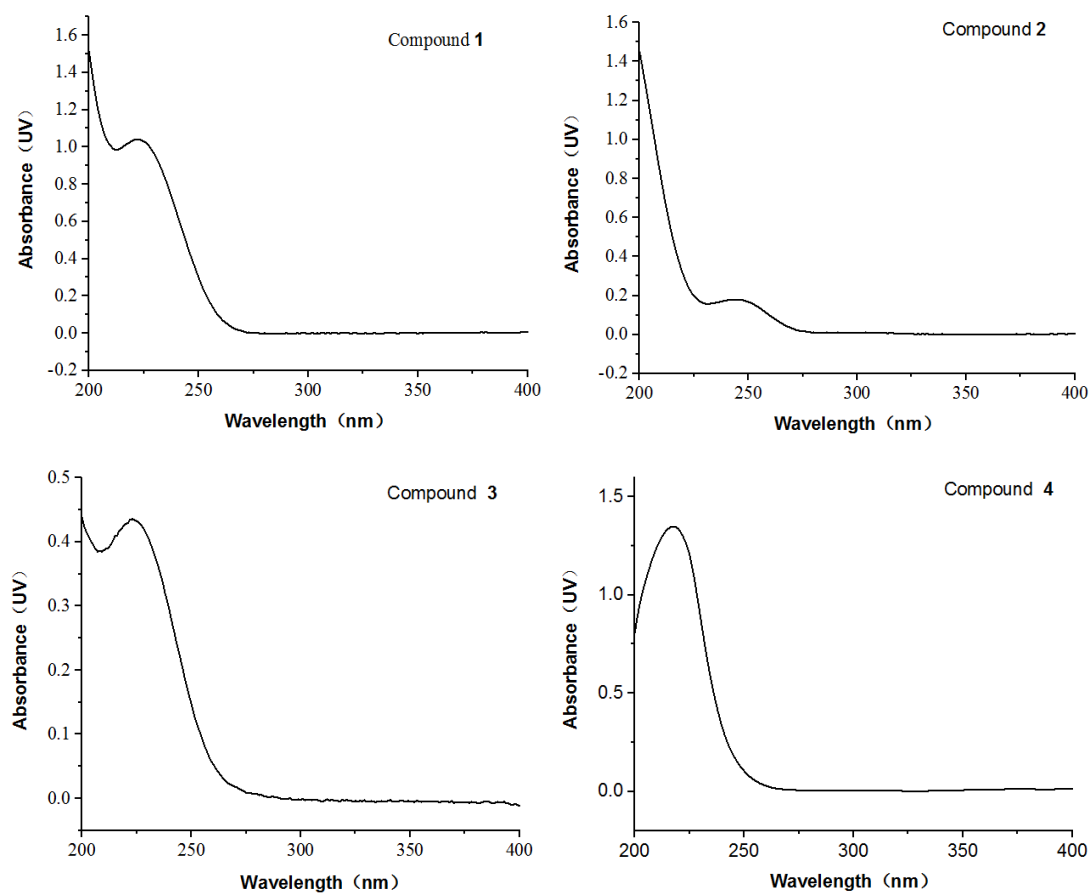

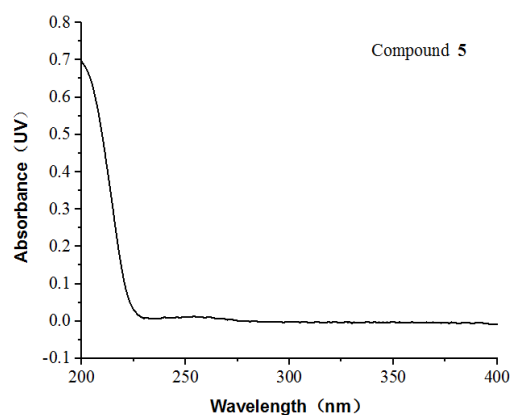

**Figure S44:** UV-vis spectra of 1–5

## Bioactivity assay data

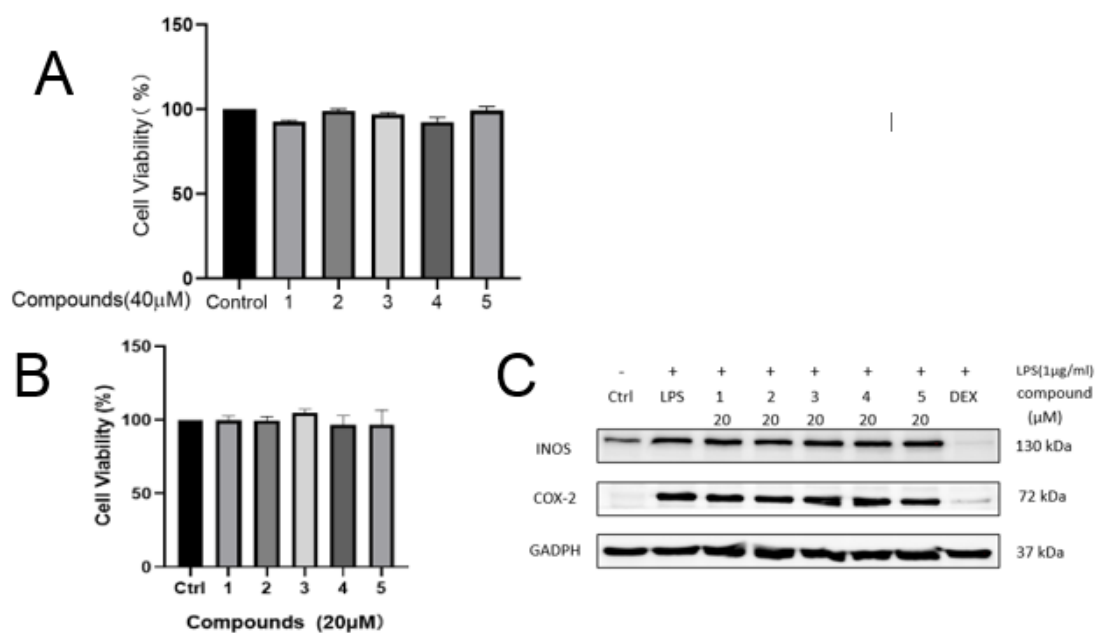

**Fig A:** human breast cancer cell line (MCF-7) were treated with 40 μM with compounds 1–5 for 24 h, and cell viability was determined by CCK-8 assay.

**Fig B:** RAW 264.7 were treated with 20 μM with compounds 1–5 for 24 h, and cell viability was determined by CCK-8 assay.

**Fig C:** Compounds suppress LPS-induced INOS and COX-2 expression in RAW 264.7 cells. Data represent mean ±SEM values of three experiments.
